# Supplementary material for: RNA helicase DDX5-induced circPHF14 promotes gastric cancer cell progression
Source: Aging (Albany NY). 2023 Mar 30;15(7):2525–40. doi: 10.18632/aging.204623 (PMC10120908; doi:10.18632/aging.204623)
Supplement: Supplementary Table 1 [file aging-15-204623-s002.xlsx]

## Sheet: D-NC1,D-NC2--D1,D2.different.ci
Supplementary Table 1. circRNA-seq data by CIRCexplorer2 and CIRI2software and 7587 circular RNAs were found in the control group and DDX5 overexpressed cells.
circName	gene symbol	D-NC1	D-NC2	D1	D2	log2(Fold_change)	p-value	circBase	Web
hsa_circ:chr5:72157635-72161556	TNPO1	0	0	50.4379	49.2396	8.23802	2.40595e-06	hsa_circ_0002692	http://www.circbase.org/cgi-bin/singlerecord.cgi?id=hsa_circ_0002692
hsa_circ:chr19:11289021-11289396	KANK2	0	0	28.1288	53.929	7.9556	1.66046e-05	hsa_circ_0008554	http://www.circbase.org/cgi-bin/singlerecord.cgi?id=hsa_circ_0008554
hsa_circ:chr1:11133991-11137005	EXOSC10	0	0	21.3391	29.3093	7.26055	0.00116695	hsa_circ_0002448	http://www.circbase.org/cgi-bin/singlerecord.cgi?id=hsa_circ_0002448
hsa_circ:chr1:235316021-235318427	RBM34	0	0	16.4893	32.8264	7.22141	0.00151746	hsa_circ_0017041	http://www.circbase.org/cgi-bin/singlerecord.cgi?id=hsa_circ_0017041
hsa_circ:chr13:111870026-111885640	ARHGEF7	0	0	16.4893	31.654	7.18678	0.00181317	NA	NA
hsa_circ:chr7:11101418-11151094	PHF14	0	0	40.7383	7.03422	7.17878	0.00534537	hsa_circ_0079440	http://www.circbase.org/cgi-bin/singlerecord.cgi?id=hsa_circ_0079440
hsa_circ:chr3:50004903-50012825	RBM6	0	0	19.3992	25.7922	7.09618	0.00277289	hsa_circ_0065769	http://www.circbase.org/cgi-bin/singlerecord.cgi?id=hsa_circ_0065769
hsa_circ:chr21:33750754-33756773	URB1	0	0	20.3691	23.4474	7.05188	0.00342226	hsa_circ_0001183	http://www.circbase.org/cgi-bin/singlerecord.cgi?id=hsa_circ_0001183
hsa_circ:chr17:37840850-37842272	PGAP3	0	0	28.1288	14.0684	6.99899	0.00460058	hsa_circ_0007990	http://www.circbase.org/cgi-bin/singlerecord.cgi?id=hsa_circ_0007990
hsa_circ:chr10:12039671-12056183	UPF2	0	0	17.4593	24.6198	6.99315	0.00453581	hsa_circ_0000213	http://www.circbase.org/cgi-bin/singlerecord.cgi?id=hsa_circ_0000213
hsa_circ:chr19:58755331-58758160	ZNF544	0	0	8.72963	32.8264	6.97375	0.00562406	hsa_circ_0000967	http://www.circbase.org/cgi-bin/singlerecord.cgi?id=hsa_circ_0000967
hsa_circ:chr12:120588949-120589195	GCN1	0	0	18.4292	22.275	6.94551	0.00556781	NA	NA
hsa_circ:chr5:21491430-21497305	GUSBP1	0	0	18.4292	22.275	6.94551	0.00556781	NA	NA
hsa_circ:chr4:40892381-40937156	APBB2	0	0	15.5193	24.6198	6.92488	0.00616194	hsa_circ_0008547	http://www.circbase.org/cgi-bin/singlerecord.cgi?id=hsa_circ_0008547
hsa_circ:chr2:109388157-109389502	RANBP2	0	0	10.6695	29.3093	6.91831	0.0067299	hsa_circ_0006965	http://www.circbase.org/cgi-bin/singlerecord.cgi?id=hsa_circ_0006965
hsa_circ:chr19:36584933-36590519	WDR62	0	0	8.72963	29.3093	6.84636	0.00919493	hsa_circ_0050715	http://www.circbase.org/cgi-bin/singlerecord.cgi?id=hsa_circ_0050715
hsa_circ:chr4:6995911-7002978	TBC1D14	0	0	20.3691	17.5856	6.84518	0.00842253	hsa_circ_0006681	http://www.circbase.org/cgi-bin/singlerecord.cgi?id=hsa_circ_0006681
hsa_circ:chr15:64592518-64592922	CSNK1G1	0	0	19.3992	17.5856	6.80775	0.00970867	hsa_circ_0007949	http://www.circbase.org/cgi-bin/singlerecord.cgi?id=hsa_circ_0007949
hsa_circ:chr1:210003453-210004388	DIEXF	0	0	19.3992	17.5856	6.80775	0.00970867	hsa_circ_0016330	http://www.circbase.org/cgi-bin/singlerecord.cgi?id=hsa_circ_0016330
hsa_circ:chr17:35604935-35609962	ACACA	0	0	25.2189	11.7237	6.80714	0.0101577	hsa_circ_0043256	http://www.circbase.org/cgi-bin/singlerecord.cgi?id=hsa_circ_0043256
hsa_circ:chr14:68228083-68229536	ZFYVE26	0	0	15.5193	21.1027	6.79286	0.0102995	hsa_circ_0000545	http://www.circbase.org/cgi-bin/singlerecord.cgi?id=hsa_circ_0000545
hsa_circ:chr20:34312492-34313077	RBM39	0	0	15.5193	21.1027	6.79286	0.0102995	hsa_circ_0007632	http://www.circbase.org/cgi-bin/singlerecord.cgi?id=hsa_circ_0007632
hsa_circ:chr9:131379919-131380387	SPTAN1	0	0	13.5794	22.275	6.76201	0.011615	NA	NA
hsa_circ:chr1:93301747-93303190	RPL5	0	0	22.3091	12.8961	6.73731	0.0127598	hsa_circ_0003069	http://www.circbase.org/cgi-bin/singlerecord.cgi?id=hsa_circ_0003069
hsa_circ:chr3:50144200-50145737	RBM5	0	0	9.69959	24.6198	6.69828	0.0149116	hsa_circ_0005545	http://www.circbase.org/cgi-bin/singlerecord.cgi?id=hsa_circ_0005545
hsa_circ:chr19:11223954-11224438	LDLR	0	0	15.5193	18.7579	6.6976	0.0143046	hsa_circ_0002579	http://www.circbase.org/cgi-bin/singlerecord.cgi?id=hsa_circ_0002579
hsa_circ:chrX:53588717-53589205	HUWE1	0	0	10.6695	23.4474	6.68994	0.0151234	hsa_circ_0090739	http://www.circbase.org/cgi-bin/singlerecord.cgi?id=hsa_circ_0090739
hsa_circ:chr9:138741983-138774924	CAMSAP1	0	0	22.3091	11.7237	6.68857	0.0151016	hsa_circ_0004338	http://www.circbase.org/cgi-bin/singlerecord.cgi?id=hsa_circ_0004338
hsa_circ:chr4:139993020-139994721	ELF2	0	0	17.4593	16.4132	6.68086	0.0150939	hsa_circ_0002594	http://www.circbase.org/cgi-bin/singlerecord.cgi?id=hsa_circ_0002594
hsa_circ:chr15:44048847-44055404	PDIA3	0	0	21.3391	11.7237	6.64678	0.0171885	hsa_circ_0002891	http://www.circbase.org/cgi-bin/singlerecord.cgi?id=hsa_circ_0002891
hsa_circ:chrX:2871184-2873578	ARSE	0	0	22.3091	10.5513	6.63813	0.0178496	hsa_circ_0089823	http://www.circbase.org/cgi-bin/singlerecord.cgi?id=hsa_circ_0089823
hsa_circ:chr10:99148009-99148381	RRP12	0	0	11.6395	21.1027	6.63088	0.0179727	hsa_circ_0019337	http://www.circbase.org/cgi-bin/singlerecord.cgi?id=hsa_circ_0019337
hsa_circ:chr7:40027198-40041630	CDK13	0	0	11.6395	21.1027	6.63088	0.0179727	hsa_circ_0001699	http://www.circbase.org/cgi-bin/singlerecord.cgi?id=hsa_circ_0001699
hsa_circ:chr14:71492834-71502874	PCNX1	0	0	7.75967	24.6198	6.61411	0.0197868	hsa_circ_0007996	http://www.circbase.org/cgi-bin/singlerecord.cgi?id=hsa_circ_0007996
hsa_circ:chr1:44386076-44386600	ST3GAL3	0	0	13.5794	18.7579	6.61334	0.0187508	hsa_circ_0006595	http://www.circbase.org/cgi-bin/singlerecord.cgi?id=hsa_circ_0006595
hsa_circ:chr16:89962398-89967202	TCF25	0	0	9.69959	22.275	6.59634	0.0202871	hsa_circ_0041103	http://www.circbase.org/cgi-bin/singlerecord.cgi?id=hsa_circ_0041103
hsa_circ:chr9:33953283-33960876	UBAP2	0	0	9.69959	22.275	6.59634	0.0202871	NA	NA
hsa_circ:chr22:24431892-24439546	CABIN1	0	0	13.5794	17.5856	6.56017	0.0219764	hsa_circ_0062578	http://www.circbase.org/cgi-bin/singlerecord.cgi?id=hsa_circ_0062578
hsa_circ:chr7:959605-975141	ADAP1	0	0	20.3691	10.5513	6.5502	0.023088	NA	NA
hsa_circ:chr3:196214270-196215554	RNF168	0	0	15.5193	15.2408	6.54174	0.0231501	NA	NA
hsa_circ:chr16:89799890-89804313	FANCA,ZNF276	0	0	13.5794	16.4132	6.50496	0.0257541	hsa_circ_0040987	http://www.circbase.org/cgi-bin/singlerecord.cgi?id=hsa_circ_0040987
hsa_circ:chr22:24515334-24515665	CABIN1	0	0	13.5794	16.4132	6.50496	0.0257541	NA	NA
hsa_circ:chr2:172182351-172187208	METTL8	0	0	14.5494	15.2408	6.49541	0.026432	NA	NA
hsa_circ:chr21:34906885-34907626	GART	0	0	3.87984	25.7922	6.48757	0.0305757	hsa_circ_0008795	http://www.circbase.org/cgi-bin/singlerecord.cgi?id=hsa_circ_0008795
hsa_circ:chr15:41387799-41388551	INO80	0	0	11.6395	17.5856	6.46722	0.0287497	NA	NA
hsa_circ:chr1:167741512-167745403	MPZL1	0	0	18.4292	10.5513	6.45656	0.0298588	hsa_circ_0007921	http://www.circbase.org/cgi-bin/singlerecord.cgi?id=hsa_circ_0007921
hsa_circ:chr1:150999709-151001420	PRUNE1	0	0	20.3691	8.20659	6.43672	0.0321413	hsa_circ_0014088	http://www.circbase.org/cgi-bin/singlerecord.cgi?id=hsa_circ_0014088
hsa_circ:chr18:9588087-9595100	PPP4R1	0	0	9.69959	18.7579	6.42848	0.0322115	hsa_circ_0046882	http://www.circbase.org/cgi-bin/singlerecord.cgi?id=hsa_circ_0046882
hsa_circ:chr1:32502511-32505174	KHDRBS1	0	0	10.6695	17.5856	6.4184	0.0328651	hsa_circ_0002467	http://www.circbase.org/cgi-bin/singlerecord.cgi?id=hsa_circ_0002467
hsa_circ:chr14:31602444-31602881	HECTD1	0	0	11.6395	16.4132	6.40826	0.0336004	hsa_circ_0031485	http://www.circbase.org/cgi-bin/singlerecord.cgi?id=hsa_circ_0031485
hsa_circ:chr11:75590923-75623083	UVRAG	0	0	17.4593	10.5513	6.40736	0.0339392	hsa_circ_0023637	http://www.circbase.org/cgi-bin/singlerecord.cgi?id=hsa_circ_0023637
hsa_circ:chr3:138413628-138417937	PIK3CB	0	0	2.90988	24.6198	6.37937	0.0410656	hsa_circ_0067531	http://www.circbase.org/cgi-bin/singlerecord.cgi?id=hsa_circ_0067531
hsa_circ:chr11:581492-592674	PHRF1	0	0	9.69959	17.5856	6.36788	0.0375487	NA	NA
hsa_circ:chr17:56434829-56436184	RNF43	0	0	4.84979	22.275	6.35837	0.0407712	hsa_circ_0044775	http://www.circbase.org/cgi-bin/singlerecord.cgi?id=hsa_circ_0044775
hsa_circ:chr7:2054137-2108973	MAD1L1	0	0	4.84979	22.275	6.35837	0.0407712	NA	NA
hsa_circ:chr15:36983886-37002162	C15orf41	0	0	5.81975	21.1027	6.34777	0.0410593	hsa_circ_0008295	http://www.circbase.org/cgi-bin/singlerecord.cgi?id=hsa_circ_0008295
hsa_circ:chr4:2701407-2702271	FAM193A	0	0	6.78971	19.9303	6.3371	0.0415284	hsa_circ_0003758	http://www.circbase.org/cgi-bin/singlerecord.cgi?id=hsa_circ_0003758
hsa_circ:chr11:70505933-70507783	SHANK2	0	0	8.72963	17.5856	6.31553	0.0428697	NA	NA
hsa_circ:chr17:42936448-42937911	EFTUD2	0	0	14.5494	11.7237	6.31455	0.0424751	hsa_circ_0008601	http://www.circbase.org/cgi-bin/singlerecord.cgi?id=hsa_circ_0008601
hsa_circ:chr7:66563528-66582605	TYW1	0	0	15.5193	10.5513	6.30363	0.0437644	hsa_circ_0003228	http://www.circbase.org/cgi-bin/singlerecord.cgi?id=hsa_circ_0003228
hsa_circ:chr7:131113792-131130662	MKLN1	0	0	21.3391	4.68948	6.30258	0.0467774	hsa_circ_0082415	http://www.circbase.org/cgi-bin/singlerecord.cgi?id=hsa_circ_0082415
hsa_circ:chr9:137004942-137005933	WDR5	0	0	16.4893	9.37896	6.29264	0.0451773	NA	NA
hsa_circ:chr16:70497072-70499079	FUK	0	0	17.4593	8.20659	6.28155	0.0467335	hsa_circ_0040223	http://www.circbase.org/cgi-bin/singlerecord.cgi?id=hsa_circ_0040223
hsa_circ:chr10:62021617-62039397	ANK3	0	0	18.4292	7.03422	6.27038	0.0484828	hsa_circ_0018440	http://www.circbase.org/cgi-bin/singlerecord.cgi?id=hsa_circ_0018440
hsa_circ:chr16:88675342-88677944	ZC3H18	0	1.59619	20.3691	29.3093	4.88352	0.0119837	hsa_circ_0004640	http://www.circbase.org/cgi-bin/singlerecord.cgi?id=hsa_circ_0004640
hsa_circ:chr7:618893-751164	PRKAR1B	2.01837	0	27.1588	16.4132	4.49714	0.0303937	hsa_circ_0079041	http://www.circbase.org/cgi-bin/singlerecord.cgi?id=hsa_circ_0079041
hsa_circ:chr1:151139410-151139890	SCNM1,TNFAIP8L2-SCNM1	0	5.58666	24.249	70.3422	4.05248	0.0326641	hsa_circ_0000128	http://www.circbase.org/cgi-bin/singlerecord.cgi?id=hsa_circ_0000128
hsa_circ:chr4:77065302-77065626	NUP54	0	3.99047	19.3992	38.6882	3.81234	0.0184759	hsa_circ_0070040	http://www.circbase.org/cgi-bin/singlerecord.cgi?id=hsa_circ_0070040
hsa_circ:chrX:47705504-47755339	ZNF81	12.1102	2.39428	42.6782	33.9987	2.42503	0.030797	hsa_circ_0006364	http://www.circbase.org/cgi-bin/singlerecord.cgi?id=hsa_circ_0006364
hsa_circ:chr7:2252847-2259091	MAD1L1	15.1378	19.9523	55.2877	67.9975	1.80746	0.0129616	hsa_circ_0079149	http://www.circbase.org/cgi-bin/singlerecord.cgi?id=hsa_circ_0079149
hsa_circ:chr15:75215989-75219228	COX5A	8.07348	23.1447	50.4379	55.1014	1.74392	0.0376703	hsa_circ_0007840	http://www.circbase.org/cgi-bin/singlerecord.cgi?id=hsa_circ_0007840
hsa_circ:chr5:109049221-109051965	MAN2A1	18.1653	16.76	39.7683	75.0317	1.71503	0.0259919	hsa_circ_0008058	http://www.circbase.org/cgi-bin/singlerecord.cgi?id=hsa_circ_0008058
hsa_circ:chr12:49333438-49334971	ARF3	84.7715	95.7713	48.4979	35.1711	-1.10661	0.0407108	hsa_circ_0003770	http://www.circbase.org/cgi-bin/singlerecord.cgi?id=hsa_circ_0003770
hsa_circ:chr6:135360711-135363264	HBS1L	70.6429	52.6742	25.2189	18.7579	-1.48216	0.0359589	hsa_circ_0001641	http://www.circbase.org/cgi-bin/singlerecord.cgi?id=hsa_circ_0001641
hsa_circ:chr11:755879-760253	TALDO1	9.08266	17.5581	0	0	-6.08647	0.0493765	hsa_circ_0003307	http://www.circbase.org/cgi-bin/singlerecord.cgi?id=hsa_circ_0003307
hsa_circ:chr12:57036242-57037742	ATP5B	13.1194	13.5676	0	0	-6.08803	0.0484608	NA	NA
hsa_circ:chr10:22002701-22016857	MLLT10	17.1561	9.57713	0	0	-6.08958	0.0487123	hsa_circ_0007084	http://www.circbase.org/cgi-bin/singlerecord.cgi?id=hsa_circ_0007084
hsa_circ:chr12:121002875-121004783	RNF10	10.0918	16.76	0	0	-6.09764	0.0478354	hsa_circ_0005086	http://www.circbase.org/cgi-bin/singlerecord.cgi?id=hsa_circ_0005086
hsa_circ:chr13:52992127-53000201	VPS36	10.0918	16.76	0	0	-6.09764	0.0478354	hsa_circ_0030340	http://www.circbase.org/cgi-bin/singlerecord.cgi?id=hsa_circ_0030340
hsa_circ:chr6:101246589-101253756	ASCC3	14.1286	12.7695	0	0	-6.09918	0.0472083	hsa_circ_0077495	http://www.circbase.org/cgi-bin/singlerecord.cgi?id=hsa_circ_0077495
hsa_circ:chr1:65278421-65280523	RAVER2	11.101	15.9619	0	0	-6.10873	0.0464034	hsa_circ_0012860	http://www.circbase.org/cgi-bin/singlerecord.cgi?id=hsa_circ_0012860
hsa_circ:chr20:13509080-13568017	TASP1	11.101	15.9619	0	0	-6.10873	0.0464034	NA	NA
hsa_circ:chr7:102039995-102047945	LOC100630923,PRKRIP1	15.1378	11.9714	0	0	-6.11025	0.0460397	hsa_circ_0007004	http://www.circbase.org/cgi-bin/singlerecord.cgi?id=hsa_circ_0007004
hsa_circ:chr19:5016268-5033042	KDM4B	12.1102	15.1638	0	0	-6.11972	0.045069	hsa_circ_0048682	http://www.circbase.org/cgi-bin/singlerecord.cgi?id=hsa_circ_0048682
hsa_circ:chr19:5653126-5654467	SAFB	12.1102	15.1638	0	0	-6.11972	0.045069	hsa_circ_0000881	http://www.circbase.org/cgi-bin/singlerecord.cgi?id=hsa_circ_0000881
hsa_circ:chr12:56604081-56604352	RNF41	18.1653	9.57713	0	0	-6.14295	0.0430162	hsa_circ_0026911	http://www.circbase.org/cgi-bin/singlerecord.cgi?id=hsa_circ_0026911
hsa_circ:chr12:12672796-12674397	DUSP16	15.1378	12.7695	0	0	-6.15221	0.0415748	hsa_circ_0003855	http://www.circbase.org/cgi-bin/singlerecord.cgi?id=hsa_circ_0003855
hsa_circ:chr6:18160114-18166609	KDM1B	15.1378	12.7695	0	0	-6.15221	0.0415748	hsa_circ_0001580	http://www.circbase.org/cgi-bin/singlerecord.cgi?id=hsa_circ_0001580
hsa_circ:chr16:89857811-89862426	FANCA	6.05511	22.3466	0	0	-6.17961	0.0412336	hsa_circ_0041057	http://www.circbase.org/cgi-bin/singlerecord.cgi?id=hsa_circ_0041057
hsa_circ:chr13:30801549-30815223	KATNAL1	18.1653	10.3752	0	0	-6.18398	0.0387578	hsa_circ_0003587	http://www.circbase.org/cgi-bin/singlerecord.cgi?id=hsa_circ_0003587
hsa_circ:chr2:74654296-74654719	RTKN	18.1653	10.3752	0	0	-6.18398	0.0387578	NA	NA
hsa_circ:chr3:127778945-127779504	SEC61A1	11.101	17.5581	0	0	-6.19156	0.0380063	hsa_circ_0007841	http://www.circbase.org/cgi-bin/singlerecord.cgi?id=hsa_circ_0007841
hsa_circ:chr7:105105760-105111295	PUS7	15.1378	13.5676	0	0	-6.19299	0.037526	hsa_circ_0081849	http://www.circbase.org/cgi-bin/singlerecord.cgi?id=hsa_circ_0081849
hsa_circ:chr3:47719688-47727660	SMARCC1	19.1745	9.57713	0	0	-6.19442	0.0379625	hsa_circ_0001296	http://www.circbase.org/cgi-bin/singlerecord.cgi?id=hsa_circ_0001296
hsa_circ:chr8:103850972-103855975	AZIN1	19.1745	9.57713	0	0	-6.19442	0.0379625	hsa_circ_0003304	http://www.circbase.org/cgi-bin/singlerecord.cgi?id=hsa_circ_0003304
hsa_circ:chr3:58242289-58253072	ABHD6	4.03674	24.7409	0	0	-6.19898	0.0412252	hsa_circ_0066378	http://www.circbase.org/cgi-bin/singlerecord.cgi?id=hsa_circ_0066378
hsa_circ:chr15:50741597-50751359	USP8	8.07348	20.7504	0	0	-6.2005	0.0381208	hsa_circ_0035214	http://www.circbase.org/cgi-bin/singlerecord.cgi?id=hsa_circ_0035214
hsa_circ:chr3:183479295-183480067	YEATS2	20.1837	8.77903	0	0	-6.20478	0.0372533	hsa_circ_0004413	http://www.circbase.org/cgi-bin/singlerecord.cgi?id=hsa_circ_0004413
hsa_circ:chr6:38050168-38084515	ZFAND3	13.1194	15.9619	0	0	-6.21225	0.0357885	hsa_circ_0076251	http://www.circbase.org/cgi-bin/singlerecord.cgi?id=hsa_circ_0076251
hsa_circ:chr7:16720926-16736686	BZW2	17.1561	11.9714	0	0	-6.21365	0.0357167	hsa_circ_0007102	http://www.circbase.org/cgi-bin/singlerecord.cgi?id=hsa_circ_0007102
hsa_circ:chr17:37646810-37649143	CDK12	21.1929	7.98094	0	0	-6.21507	0.036609	NA	NA
hsa_circ:chr17:74093877-74094099	EXOC7	21.1929	7.98094	0	0	-6.21507	0.036609	hsa_circ_0008292	http://www.circbase.org/cgi-bin/singlerecord.cgi?id=hsa_circ_0008292
hsa_circ:chr15:74911538-74912566	CLK3	14.1286	15.1638	0	0	-6.22248	0.0347906	hsa_circ_0036287	http://www.circbase.org/cgi-bin/singlerecord.cgi?id=hsa_circ_0036287
hsa_circ:chr16:16180681-16196574	ABCC1	14.1286	15.1638	0	0	-6.22248	0.0347906	hsa_circ_0038132	http://www.circbase.org/cgi-bin/singlerecord.cgi?id=hsa_circ_0038132
hsa_circ:chr10:5815805-5842668	GDI2	22.2021	7.18284	0	0	-6.22529	0.0360474	hsa_circ_0017586	http://www.circbase.org/cgi-bin/singlerecord.cgi?id=hsa_circ_0017586
hsa_circ:chr17:40652725-40653322	ATP6V0A1	7.06429	22.3466	0	0	-6.22984	0.0359378	hsa_circ_0008179	http://www.circbase.org/cgi-bin/singlerecord.cgi?id=hsa_circ_0008179
hsa_circ:chr2:215632206-215646233	BARD1	12.1102	17.5581	0	0	-6.24136	0.0333153	hsa_circ_0001098	http://www.circbase.org/cgi-bin/singlerecord.cgi?id=hsa_circ_0001098
hsa_circ:chr9:19286767-19305525	DENND4C	6.05511	23.9428	0	0	-6.25858	0.0340385	hsa_circ_0005684	http://www.circbase.org/cgi-bin/singlerecord.cgi?id=hsa_circ_0005684
hsa_circ:chr15:91009233-91009668	IQGAP1	14.1286	15.9619	0	0	-6.26135	0.0314036	hsa_circ_0002450	http://www.circbase.org/cgi-bin/singlerecord.cgi?id=hsa_circ_0002450
hsa_circ:chr19:33108495-33113525	ANKRD27	14.1286	15.9619	0	0	-6.26135	0.0314036	hsa_circ_0008370	http://www.circbase.org/cgi-bin/singlerecord.cgi?id=hsa_circ_0008370
hsa_circ:chr19:33481420-33482875	RHPN2	5.04592	25.539	0	0	-6.28676	0.0324595	hsa_circ_0050427	http://www.circbase.org/cgi-bin/singlerecord.cgi?id=hsa_circ_0050427
hsa_circ:chr22:32134373-32134897	PRR14L	10.0918	20.7504	0	0	-6.29788	0.0290944	NA	NA
hsa_circ:chr16:69317951-69318147	SNTB2	14.1286	16.76	0	0	-6.2992	0.0283409	hsa_circ_0004354	http://www.circbase.org/cgi-bin/singlerecord.cgi?id=hsa_circ_0004354
hsa_circ:chr8:38677040-38678153	TACC1	7.06429	23.9428	0	0	-6.30618	0.0295939	hsa_circ_0003316	http://www.circbase.org/cgi-bin/singlerecord.cgi?id=hsa_circ_0003316
hsa_circ:chr21:27326904-27372497	APP	17.1561	14.3657	0	0	-6.32791	0.0261184	hsa_circ_0061339	http://www.circbase.org/cgi-bin/singlerecord.cgi?id=hsa_circ_0061339
hsa_circ:chr10:79613112-79616650	DLG5	21.1929	10.3752	0	0	-6.32919	0.0265324	hsa_circ_0018937	http://www.circbase.org/cgi-bin/singlerecord.cgi?id=hsa_circ_0018937
hsa_circ:chr19:49507534-49510625	RUVBL2	22.2021	9.57713	0	0	-6.33863	0.0260549	NA	NA
hsa_circ:chr19:34818326-34821252	KIAA0355	19.1745	12.7695	0	0	-6.34673	0.0248849	hsa_circ_0006054	http://www.circbase.org/cgi-bin/singlerecord.cgi?id=hsa_circ_0006054
hsa_circ:chr5:167915607-167924353	RARS	26.2388	6.38475	0	0	-6.3758	0.0247201	hsa_circ_0001551	http://www.circbase.org/cgi-bin/singlerecord.cgi?id=hsa_circ_0001551
hsa_circ:chr3:93714718-93722752	ARL13B	7.06429	25.539	0	0	-6.3787	0.0243744	hsa_circ_0006135	http://www.circbase.org/cgi-bin/singlerecord.cgi?id=hsa_circ_0006135
hsa_circ:chr7:157015948-157018233	UBE3C	17.1561	15.9619	0	0	-6.39935	0.0211914	hsa_circ_0007864	http://www.circbase.org/cgi-bin/singlerecord.cgi?id=hsa_circ_0007864
hsa_circ:chr11:126142864-126143349	FOXRED1	10.0918	23.1447	0	0	-6.40592	0.0215705	hsa_circ_0002019	http://www.circbase.org/cgi-bin/singlerecord.cgi?id=hsa_circ_0002019
hsa_circ:chr4:128590191-128609022	INTU	19.1745	14.3657	0	0	-6.41726	0.0201428	hsa_circ_0003390	http://www.circbase.org/cgi-bin/singlerecord.cgi?id=hsa_circ_0003390
hsa_circ:chr22:18165980-18185152	BCL2L13	16.147	17.5581	0	0	-6.42496	0.0196283	hsa_circ_0062169	http://www.circbase.org/cgi-bin/singlerecord.cgi?id=hsa_circ_0062169
hsa_circ:chr1:92798948-92846430	RPAP2	13.1194	20.7504	0	0	-6.43261	0.0194112	hsa_circ_0000091	http://www.circbase.org/cgi-bin/singlerecord.cgi?id=hsa_circ_0000091
hsa_circ:chr1:22173847-22175524	HSPG2	17.1561	16.76	0	0	-6.43378	0.0190905	hsa_circ_0006155	http://www.circbase.org/cgi-bin/singlerecord.cgi?id=hsa_circ_0006155
hsa_circ:chr4:77977115-77987558	CCNI	21.1929	13.5676	0	0	-6.46855	0.0172861	NA	NA
hsa_circ:chr10:22193451-22209892	DNAJC1	15.1378	19.9523	0	0	-6.48339	0.0164204	hsa_circ_0004306	http://www.circbase.org/cgi-bin/singlerecord.cgi?id=hsa_circ_0004306
hsa_circ:chr19:2936522-2939405	ZNF77	16.147	19.1543	0	0	-6.49186	0.015922	NA	NA
hsa_circ:chr6:42571326-42574389	UBR2	13.1194	22.3466	0	0	-6.49918	0.0158004	hsa_circ_0003177	http://www.circbase.org/cgi-bin/singlerecord.cgi?id=hsa_circ_0003177
hsa_circ:chr9:138741983-138754454	CAMSAP1	19.1745	16.76	0	0	-6.51699	0.0146141	hsa_circ_0089487	http://www.circbase.org/cgi-bin/singlerecord.cgi?id=hsa_circ_0089487
hsa_circ:chr2:233651860-233660931	GIGYF2	15.1378	21.5485	0	0	-6.5477	0.0132691	hsa_circ_0058733	http://www.circbase.org/cgi-bin/singlerecord.cgi?id=hsa_circ_0058733
hsa_circ:chr5:38991051-39021238	RICTOR	14.1286	23.9428	0	0	-6.60147	0.0110608	hsa_circ_0006308	http://www.circbase.org/cgi-bin/singlerecord.cgi?id=hsa_circ_0006308
hsa_circ:chr8:141889570-141900868	PTK2	11.101	27.1352	0	0	-6.60826	0.0111926	hsa_circ_0006646	http://www.circbase.org/cgi-bin/singlerecord.cgi?id=hsa_circ_0006646
hsa_circ:chr17:28011581-28030080	SSH2	28.2572	10.3752	0	0	-6.62005	0.0107594	hsa_circ_0000754	http://www.circbase.org/cgi-bin/singlerecord.cgi?id=hsa_circ_0000754
hsa_circ:chr6:101163338-101173579	ASCC3	14.1286	25.539	0	0	-6.66085	0.00887413	hsa_circ_0008321	http://www.circbase.org/cgi-bin/singlerecord.cgi?id=hsa_circ_0008321
hsa_circ:chr3:30713130-30715738	TGFBR2	22.2021	17.5581	0	0	-6.66276	0.00857419	hsa_circ_0064656	http://www.circbase.org/cgi-bin/singlerecord.cgi?id=hsa_circ_0064656
hsa_circ:chrX:37245852-37285253	PRRG1	26.2388	14.3657	0	0	-6.69243	0.0077801	hsa_circ_0008077	http://www.circbase.org/cgi-bin/singlerecord.cgi?id=hsa_circ_0008077
hsa_circ:chr8:132952746-132958880	EFR3A	20.1837	21.5485	0	0	-6.73315	0.00640626	NA	NA
hsa_circ:chr16:48381418-48382201	LONP2	6.05511	37.5104	0	0	-6.79757	0.00629647	hsa_circ_0005813	http://www.circbase.org/cgi-bin/singlerecord.cgi?id=hsa_circ_0005813
hsa_circ:chr1:31810022-31811895	ENSG00000229044.1,ZCCHC17	11.101	32.7218	0	0	-6.80537	0.00521316	hsa_circ_0009057	http://www.circbase.org/cgi-bin/singlerecord.cgi?id=hsa_circ_0009057
hsa_circ:chr7:133002038-133059756	EXOC4	11.101	32.7218	0	0	-6.80537	0.00521316	hsa_circ_0008419	http://www.circbase.org/cgi-bin/singlerecord.cgi?id=hsa_circ_0008419
hsa_circ:chr8:42919244-42927450	FNTA	25.2296	19.9523	0	0	-6.84715	0.00385417	hsa_circ_0006586	http://www.circbase.org/cgi-bin/singlerecord.cgi?id=hsa_circ_0006586
hsa_circ:chr19:6759605-6760998	SH2D3A	11.101	34.318	0	0	-6.85709	0.00417855	NA	NA
hsa_circ:chr10:126370176-126384781	FAM53B	37.3398	9.57713	0	0	-6.89972	0.00355558	hsa_circ_0003570	http://www.circbase.org/cgi-bin/singlerecord.cgi?id=hsa_circ_0003570
hsa_circ:chr8:6582391-6605349	AGPAT5	30.2755	16.76	0	0	-6.90447	0.00301526	hsa_circ_0002682	http://www.circbase.org/cgi-bin/singlerecord.cgi?id=hsa_circ_0002682
hsa_circ:chr1:19244856-19246267	IFFO2	28.2572	23.1447	0	0	-7.03326	0.00150291	NA	NA
hsa_circ:chr20:3888573-3893281	PANK2	30.2755	23.1447	0	0	-7.08867	0.00111545	hsa_circ_0006873	http://www.circbase.org/cgi-bin/singlerecord.cgi?id=hsa_circ_0006873
hsa_circ:chr15:76580187-76585041	ETFA	39.3582	19.9523	0	0	-7.23863	0.000506157	hsa_circ_0000639	http://www.circbase.org/cgi-bin/singlerecord.cgi?id=hsa_circ_0000639
hsa_circ:chr19:14513409-14515374	ADGRE5	32.2939	27.1352	0	0	-7.24263	0.000457631	hsa_circ_0004853	http://www.circbase.org/cgi-bin/singlerecord.cgi?id=hsa_circ_0004853
hsa_circ:chr1:85816098-85824530	DDAH1	29.2664	35.1161	0	0	-7.35901	0.000227845	hsa_circ_0004607	http://www.circbase.org/cgi-bin/singlerecord.cgi?id=hsa_circ_0004607
hsa_circ:chr19:12783661-12784130	WDR83	32.2939	39.1066	0	0	-7.50833	9.05966e-05	hsa_circ_0049540	http://www.circbase.org/cgi-bin/singlerecord.cgi?id=hsa_circ_0049540
