# Supplementary material for: RNA helicase DDX5-induced circPHF14 promotes gastric cancer cell progression
Source: Aging (Albany NY). 2023 Mar 30;15(7):2525–40. doi: 10.18632/aging.204623 (PMC10120908; doi:10.18632/aging.204623)
Supplement: Supplementary Table 2 [file aging-15-204623-s003.xlsx]

## Sheet: aging-23-015333-s003
Supplementary Table 2. DDX5 overexpression promoted or inhibited the expression of 72 and 80 circular RNAs, respectively.
circName	gene symbol	D-NC1	D-NC2	D1	D2	log2(Fold_change)	p-value	circBase	Web
hsa_circ:chr10:102016019-102021820	CWF19L1	5.04592	0	0	0	-3.67914	0.445627	hsa_circ_0019506	http://www.circbase.org/cgi-bin/singlerecord.cgi?id=hsa_circ_0019506
hsa_circ:chr10:102114184-102114389	SCD	0	0	14.5494	0	5.46349	0.255095	NA	NA
hsa_circ:chr10:102683732-102685776	SLF2	0	12.7695	3.87984	10.5513	0.167418	0.95153	hsa_circ_0006654	http://www.circbase.org/cgi-bin/singlerecord.cgi?id=hsa_circ_0006654
hsa_circ:chr10:102697159-102698493	SLF2	4.03674	12.7695	0	0	-5.4223	0.162756	hsa_circ_0019540	http://www.circbase.org/cgi-bin/singlerecord.cgi?id=hsa_circ_0019540
hsa_circ:chr10:102697159-102703885	SLF2	12.1102	0	16.4893	0	0.449552	0.922043	hsa_circ_0006409	http://www.circbase.org/cgi-bin/singlerecord.cgi?id=hsa_circ_0006409
hsa_circ:chr10:102750193-102750811	TWNK	0	0	0	9.37896	4.82502	0.315758	NA	NA
hsa_circ:chr10:103344359-103345913	POLL	0	9.57713	0	0	-4.61256	0.337098	hsa_circ_0006555	http://www.circbase.org/cgi-bin/singlerecord.cgi?id=hsa_circ_0006555
hsa_circ:chr10:103384502-103436193	FBXW4	12.1102	0	17.4593	12.8961	1.33783	0.530507	hsa_circ_0005741	http://www.circbase.org/cgi-bin/singlerecord.cgi?id=hsa_circ_0005741
hsa_circ:chr10:103427643-103433430	FBXW4	0	0	7.75967	0	4.55829	0.343757	hsa_circ_0019589	http://www.circbase.org/cgi-bin/singlerecord.cgi?id=hsa_circ_0019589
hsa_circ:chr10:103427643-103436193	FBXW4	57.5235	107.743	95.056	69.1699	-0.0113548	0.982367	hsa_circ_0008362	http://www.circbase.org/cgi-bin/singlerecord.cgi?id=hsa_circ_0008362
hsa_circ:chr10:103432672-103433430	FBXW4	0	15.9619	0	0	-5.34827	0.264887	hsa_circ_0019591	http://www.circbase.org/cgi-bin/singlerecord.cgi?id=hsa_circ_0019591
hsa_circ:chr10:103432672-103436193	FBXW4	18.1653	36.7123	44.6181	44.5501	0.694004	0.37219	hsa_circ_0000255	http://www.circbase.org/cgi-bin/singlerecord.cgi?id=hsa_circ_0000255
hsa_circ:chr10:103559999-103567658	MGEA5	0	2.39428	0	0	-2.6212	0.590064	hsa_circ_0019614	http://www.circbase.org/cgi-bin/singlerecord.cgi?id=hsa_circ_0019614
hsa_circ:chr10:103783234-103785005	C10orf76	2.01837	0	0	0	-2.34908	0.630393	NA	NA
hsa_circ:chr10:103916776-103917971	NOLC1	15.1378	43.0971	17.4593	14.0684	-0.888212	0.406292	hsa_circ_0000257	http://www.circbase.org/cgi-bin/singlerecord.cgi?id=hsa_circ_0000257
hsa_circ:chr10:104119941-104120152	GBF1	0	0	17.4593	0	5.72619	0.232696	hsa_circ_0003839	http://www.circbase.org/cgi-bin/singlerecord.cgi?id=hsa_circ_0003839
hsa_circ:chr10:104135116-104136885	GBF1	6.05511	0	0	0	-3.94312	0.413042	hsa_circ_0008900	http://www.circbase.org/cgi-bin/singlerecord.cgi?id=hsa_circ_0008900
hsa_circ:chr10:104243917-104245490	ACTR1A	4.03674	16.76	0	0	-5.72998	0.102247	hsa_circ_0019749	http://www.circbase.org/cgi-bin/singlerecord.cgi?id=hsa_circ_0019749
hsa_circ:chr10:104352339-104359301	SUFU	0	0	0	21.1027	5.9966	0.211156	hsa_circ_0003779	http://www.circbase.org/cgi-bin/singlerecord.cgi?id=hsa_circ_0003779
hsa_circ:chr10:1046617-1051847	GTPBP4	5.04592	0	0	0	-3.67914	0.445627	NA	NA
hsa_circ:chr10:1046617-1053068	GTPBP4	0	7.98094	0	0	-4.35014	0.36571	hsa_circ_0017426	http://www.circbase.org/cgi-bin/singlerecord.cgi?id=hsa_circ_0017426
hsa_circ:chr10:105165742-105166547	PDCD11	0	4.78856	0	0	-3.61557	0.453691	NA	NA
hsa_circ:chr10:105197772-105198565	PDCD11	32.2939	0	20.3691	21.1027	0.363642	0.890916	hsa_circ_0000258	http://www.circbase.org/cgi-bin/singlerecord.cgi?id=hsa_circ_0000258
hsa_circ:chr10:105199503-105200607	PDCD11	0	90.9827	41.7082	87.9278	0.509816	0.861776	hsa_circ_0003366	http://www.circbase.org/cgi-bin/singlerecord.cgi?id=hsa_circ_0003366
hsa_circ:chr10:105777918-105778666	SLK	0	0	7.75967	0	4.55829	0.343757	hsa_circ_0019884	http://www.circbase.org/cgi-bin/singlerecord.cgi?id=hsa_circ_0019884
hsa_circ:chr10:106019334-106022835	GSTO1	6.05511	0	0	0	-3.94312	0.413042	hsa_circ_0009067	http://www.circbase.org/cgi-bin/singlerecord.cgi?id=hsa_circ_0009067
hsa_circ:chr10:1118056-1123943	WDR37	9.08266	0	0	0	-4.52967	0.345973	hsa_circ_0017437	http://www.circbase.org/cgi-bin/singlerecord.cgi?id=hsa_circ_0017437
hsa_circ:chr10:111860383-111872673	ADD3	0	0	2.90988	0	3.1489	0.517345	NA	NA
hsa_circ:chr10:111878345-111886261	ADD3	9.08266	0	0	0	-4.52967	0.345973	NA	NA
hsa_circ:chr10:111883775-111890244	ADD3	19.1745	23.1447	20.3691	11.7237	-0.396441	0.733966	hsa_circ_0003357	http://www.circbase.org/cgi-bin/singlerecord.cgi?id=hsa_circ_0003357
hsa_circ:chr10:112352831-112358048	SMC3	0	7.98094	0	0	-4.35014	0.36571	hsa_circ_0020022	http://www.circbase.org/cgi-bin/singlerecord.cgi?id=hsa_circ_0020022
hsa_circ:chr10:112356156-112358048	SMC3	75.6889	75.8189	83.4165	59.7909	-0.0786007	0.876435	hsa_circ_0000260	http://www.circbase.org/cgi-bin/singlerecord.cgi?id=hsa_circ_0000260
hsa_circ:chr10:1123847-1151207	WDR37	0	0	0	8.20659	4.63195	0.335868	hsa_circ_0017444	http://www.circbase.org/cgi-bin/singlerecord.cgi?id=hsa_circ_0017444
hsa_circ:chr10:112723883-112724819	SHOC2	0	0	0	5.86185	4.14518	0.390227	hsa_circ_0000261	http://www.circbase.org/cgi-bin/singlerecord.cgi?id=hsa_circ_0000261
hsa_circ:chr10:1130343-1142186	WDR37	9.08266	7.98094	10.6695	41.033	1.59644	0.222054	hsa_circ_0000206	http://www.circbase.org/cgi-bin/singlerecord.cgi?id=hsa_circ_0000206
hsa_circ:chr10:1130343-1151207	WDR37	16.147	26.3371	8.72963	0	-2.26499	0.217569	hsa_circ_0007796	http://www.circbase.org/cgi-bin/singlerecord.cgi?id=hsa_circ_0007796
hsa_circ:chr10:114220283-114224416	VTI1A	3.02755	0	0	0	-2.93848	0.544567	hsa_circ_0020045	http://www.circbase.org/cgi-bin/singlerecord.cgi?id=hsa_circ_0020045
hsa_circ:chr10:114286846-114298089	VTI1A	0	0	32.0086	0	6.5999	0.168428	hsa_circ_0002533	http://www.circbase.org/cgi-bin/singlerecord.cgi?id=hsa_circ_0002533
hsa_circ:chr10:114724315-114799885	TCF7L2	10.0918	0	0	0	-4.682	0.329779	hsa_circ_0020048	http://www.circbase.org/cgi-bin/singlerecord.cgi?id=hsa_circ_0020048
hsa_circ:chr10:1149542-1151207	WDR37	0	27.9333	7.75967	0	-1.84527	0.688357	hsa_circ_0017465	http://www.circbase.org/cgi-bin/singlerecord.cgi?id=hsa_circ_0017465
hsa_circ:chr10:11543100-11569566	USP6NL	11.101	0	0	0	-4.81976	0.315569	hsa_circ_0017687	http://www.circbase.org/cgi-bin/singlerecord.cgi?id=hsa_circ_0017687
hsa_circ:chr10:11551594-11569566	USP6NL	0	17.5581	25.2189	14.0684	1.15639	0.625373	hsa_circ_0017688	http://www.circbase.org/cgi-bin/singlerecord.cgi?id=hsa_circ_0017688
hsa_circ:chr10:11567385-11639716	USP6NL	2.01837	0	0	0	-2.34908	0.630393	NA	NA
hsa_circ:chr10:116225457-116251637	ABLIM1	0	5.58666	0	0	-3.83712	0.425951	hsa_circ_0020071	http://www.circbase.org/cgi-bin/singlerecord.cgi?id=hsa_circ_0020071
hsa_circ:chr10:116331056-116361720	ABLIM1	10.0918	0	0	0	-4.682	0.329779	hsa_circ_0020075	http://www.circbase.org/cgi-bin/singlerecord.cgi?id=hsa_circ_0020075
hsa_circ:chr10:116590611-116596005	FAM160B1	10.0918	0	0	0	-4.682	0.329779	hsa_circ_0020078	http://www.circbase.org/cgi-bin/singlerecord.cgi?id=hsa_circ_0020078
hsa_circ:chr10:1170158-1170964	WDR37	0	23.9428	0	23.4474	-0.0326222	0.994318	hsa_circ_0017469	http://www.circbase.org/cgi-bin/singlerecord.cgi?id=hsa_circ_0017469
hsa_circ:chr10:11789348-11797607	ECHDC3	0	0	12.6095	9.37896	6.0578	0.0737461	hsa_circ_0017695	http://www.circbase.org/cgi-bin/singlerecord.cgi?id=hsa_circ_0017695
hsa_circ:chr10:118661276-118681027	SHTN1	0	4.78856	0	0	-3.61557	0.453691	hsa_circ_0020122	http://www.circbase.org/cgi-bin/singlerecord.cgi?id=hsa_circ_0020122
hsa_circ:chr10:118666138-118681027	SHTN1	7.06429	0	0	0	-4.16619	0.386659	NA	NA
hsa_circ:chr10:118674886-118681027	SHTN1	0	2.39428	0	0	-2.6212	0.590064	NA	NA
hsa_circ:chr10:11893996-11894214	PROSER2	65.597	70.2323	20.3691	58.6185	-0.790698	0.234268	NA	NA
hsa_circ:chr10:119049697-119100613	PDZD8	8.07348	0	0	0	-4.35935	0.364681	NA	NA
hsa_circ:chr10:11990368-11994248	UPF2	0	0	6.78971	0	4.36615	0.364903	NA	NA
hsa_circ:chr10:12039671-12046726	UPF2	8.07348	0	0	0	-4.35935	0.364681	hsa_circ_0007448	http://www.circbase.org/cgi-bin/singlerecord.cgi?id=hsa_circ_0007448
hsa_circ:chr10:12039671-12056183	UPF2	0	0	17.4593	24.6198	6.99315	0.00453581	hsa_circ_0000213	http://www.circbase.org/cgi-bin/singlerecord.cgi?id=hsa_circ_0000213
hsa_circ:chr10:120460818-120489922	CACUL1	0	7.98094	0	0	-4.35014	0.36571	hsa_circ_0002028	http://www.circbase.org/cgi-bin/singlerecord.cgi?id=hsa_circ_0002028
hsa_circ:chr10:120467004-120489922	CACUL1	0	0	9.69959	0	4.8795	0.310232	NA	NA
hsa_circ:chr10:120488807-120489922	CACUL1	10.0918	17.5581	0	10.5513	-1.40214	0.535469	hsa_circ_0020134	http://www.circbase.org/cgi-bin/singlerecord.cgi?id=hsa_circ_0020134
hsa_circ:chr10:120801506-120803654	EIF3A	0	0	9.69959	0	4.8795	0.310232	NA	NA
hsa_circ:chr10:120832402-120833449	EIF3A	0	7.18284	11.6395	5.86185	1.27572	0.654886	hsa_circ_0004350	http://www.circbase.org/cgi-bin/singlerecord.cgi?id=hsa_circ_0004350
hsa_circ:chr10:120928689-120934104	PRDX3	0	0	15.5193	0	5.55647	0.246999	NA	NA
hsa_circ:chr10:12123471-12126750	DHTKD1	0	0	0	12.8961	5.28526	0.271134	hsa_circ_0017724	http://www.circbase.org/cgi-bin/singlerecord.cgi?id=hsa_circ_0017724
hsa_circ:chr10:12123471-12133683	DHTKD1	13.1194	15.1638	13.5794	0	-1.04928	0.621672	hsa_circ_0003074	http://www.circbase.org/cgi-bin/singlerecord.cgi?id=hsa_circ_0003074
hsa_circ:chr10:12123471-12136270	DHTKD1	0	12.7695	0	10.5513	-0.280308	0.951423	hsa_circ_0004630	http://www.circbase.org/cgi-bin/singlerecord.cgi?id=hsa_circ_0004630
hsa_circ:chr10:121275021-121286936	RGS10	0	0	3.87984	0	3.56175	0.462171	hsa_circ_0005516	http://www.circbase.org/cgi-bin/singlerecord.cgi?id=hsa_circ_0005516
hsa_circ:chr10:12160748-12162266	DHTKD1	7.06429	0	0	8.20659	0.217011	0.96212	hsa_circ_0000214	http://www.circbase.org/cgi-bin/singlerecord.cgi?id=hsa_circ_0000214
hsa_circ:chr10:121662311-121663789	SEC23IP	0	0	0	3.51711	3.40518	0.482694	hsa_circ_0020197	http://www.circbase.org/cgi-bin/singlerecord.cgi?id=hsa_circ_0020197
hsa_circ:chr10:121663596-121668642	SEC23IP	0	0	0	8.20659	4.63195	0.335868	hsa_circ_0005312	http://www.circbase.org/cgi-bin/singlerecord.cgi?id=hsa_circ_0005312
hsa_circ:chr10:121668553-121675401	SEC23IP	0	14.3657	0	0	-5.19648	0.278824	NA	NA
hsa_circ:chr10:12257739-12259466	CDC123	0	3.99047	0	0	-3.3537	0.487777	NA	NA
hsa_circ:chr10:122637865-122649521	WDR11	6.05511	0	0	0	-3.94312	0.413042	NA	NA
hsa_circ:chr10:123274631-123279683	FGFR2	0	0	7.75967	0	4.55829	0.343757	NA	NA
hsa_circ:chr10:123298106-123325218	FGFR2	26.2388	35.9142	17.4593	8.20659	-1.27033	0.233249	NA	NA
hsa_circ:chr10:123310804-123325218	FGFR2	0	0	10.6695	0	5.01674	0.296603	NA	NA
hsa_circ:chr10:123324016-123325218	FGFR2	21.1929	19.1543	4.84979	14.0684	-1.0998	0.4395	hsa_circ_0020238	http://www.circbase.org/cgi-bin/singlerecord.cgi?id=hsa_circ_0020238
hsa_circ:chr10:123658356-123662135	ATE1	0	4.78856	0	0	-3.61557	0.453691	hsa_circ_0020250	http://www.circbase.org/cgi-bin/singlerecord.cgi?id=hsa_circ_0020250
hsa_circ:chr10:123718839-123722843	NSMCE4A	0	0	7.75967	0	4.55829	0.343757	NA	NA
hsa_circ:chr10:123892124-123903221	TACC2	0	0	2.90988	0	3.1489	0.517345	NA	NA
hsa_circ:chr10:126097111-126097534	OAT	0	6.38475	4.84979	0	-0.395474	0.929189	hsa_circ_0002676	http://www.circbase.org/cgi-bin/singlerecord.cgi?id=hsa_circ_0002676
hsa_circ:chr10:126097111-126100769	OAT	5.04592	7.18284	0	43.3777	1.82357	0.504436	hsa_circ_0008898	http://www.circbase.org/cgi-bin/singlerecord.cgi?id=hsa_circ_0008898
hsa_circ:chr10:126176991-126186697	LHPP	11.101	0	8.72963	0	-0.340709	0.941064	hsa_circ_0003766	http://www.circbase.org/cgi-bin/singlerecord.cgi?id=hsa_circ_0003766
hsa_circ:chr10:126370176-126370948	FAM53B	57.5235	54.2704	36.8584	53.929	-0.30305	0.625402	hsa_circ_0000267	http://www.circbase.org/cgi-bin/singlerecord.cgi?id=hsa_circ_0000267
hsa_circ:chr10:126370176-126384781	FAM53B	37.3398	9.57713	0	0	-6.89972	0.00355558	hsa_circ_0003570	http://www.circbase.org/cgi-bin/singlerecord.cgi?id=hsa_circ_0003570
hsa_circ:chr10:126370176-126395456	FAM53B	12.1102	0	0	22.275	0.880397	0.847894	hsa_circ_0002282	http://www.circbase.org/cgi-bin/singlerecord.cgi?id=hsa_circ_0002282
hsa_circ:chr10:126384727-126395456	FAM53B	23.2112	20.7504	0	19.9303	-1.1464	0.632255	hsa_circ_0008456	http://www.circbase.org/cgi-bin/singlerecord.cgi?id=hsa_circ_0008456
hsa_circ:chr10:126395205-126395456	FAM53B	35.3215	34.318	32.0086	25.7922	-0.266912	0.74124	hsa_circ_0005734	http://www.circbase.org/cgi-bin/singlerecord.cgi?id=hsa_circ_0005734
hsa_circ:chr10:126727566-126799662	CTBP2	69.6337	0	61.1074	38.6882	0.520455	0.857394	hsa_circ_0005418	http://www.circbase.org/cgi-bin/singlerecord.cgi?id=hsa_circ_0005418
hsa_circ:chr10:126727566-126822181	CTBP2	7.06429	25.539	5.81975	24.6198	-0.110426	0.938612	NA	NA
hsa_circ:chr10:127431627-127442414	EDRF1	0	0	0	2.34474	2.81658	0.564129	hsa_circ_0020358	http://www.circbase.org/cgi-bin/singlerecord.cgi?id=hsa_circ_0020358
hsa_circ:chr10:128768966-128788867	DOCK1	33.3031	46.2894	24.249	23.4474	-0.740454	0.36458	hsa_circ_0007142	http://www.circbase.org/cgi-bin/singlerecord.cgi?id=hsa_circ_0007142
hsa_circ:chr10:128768966-128798571	DOCK1,ENSG00000223528.3	9.08266	5.58666	10.6695	0	-0.450943	0.872972	hsa_circ_0002669	http://www.circbase.org/cgi-bin/singlerecord.cgi?id=hsa_circ_0002669
hsa_circ:chr10:128768966-128926028	DOCK1	0	3.99047	0	0	-3.3537	0.487777	hsa_circ_0020397	http://www.circbase.org/cgi-bin/singlerecord.cgi?id=hsa_circ_0020397
hsa_circ:chr10:128806996-128817099	DOCK1	0	2.39428	0	0	-2.6212	0.590064	hsa_circ_0003499	http://www.circbase.org/cgi-bin/singlerecord.cgi?id=hsa_circ_0003499
hsa_circ:chr10:128806996-128821588	DOCK1	0	5.58666	0	0	-3.83712	0.425951	hsa_circ_0003515	http://www.circbase.org/cgi-bin/singlerecord.cgi?id=hsa_circ_0003515
hsa_circ:chr10:128810559-128860040	DOCK1	0	0	2.90988	0	3.1489	0.517345	NA	NA
hsa_circ:chr10:128829914-128836080	DOCK1	10.0918	0	14.5494	10.5513	1.32624	0.577465	hsa_circ_0002050	http://www.circbase.org/cgi-bin/singlerecord.cgi?id=hsa_circ_0002050
hsa_circ:chr10:128829914-128851079	DOCK1	0	1.59619	0	0	-2.0415	0.676651	NA	NA
hsa_circ:chr10:128840889-128860040	DOCK1	0	0	2.90988	0	3.1489	0.517345	hsa_circ_0020457	http://www.circbase.org/cgi-bin/singlerecord.cgi?id=hsa_circ_0020457
hsa_circ:chr10:128850945-128860040	DOCK1	6.05511	7.98094	0	11.7237	-0.267032	0.924372	hsa_circ_0020460	http://www.circbase.org/cgi-bin/singlerecord.cgi?id=hsa_circ_0020460
hsa_circ:chr10:128859932-128908618	DOCK1	12.1102	12.7695	9.69959	0	-1.34835	0.569583	hsa_circ_0020462	http://www.circbase.org/cgi-bin/singlerecord.cgi?id=hsa_circ_0020462
hsa_circ:chr10:128859932-128926028	DOCK1	5.04592	0	11.6395	0	1.21458	0.787537	hsa_circ_0002446	http://www.circbase.org/cgi-bin/singlerecord.cgi?id=hsa_circ_0002446
hsa_circ:chr10:128923738-128926028	DOCK1	0	11.9714	0	0	-4.93386	0.304114	hsa_circ_0002456	http://www.circbase.org/cgi-bin/singlerecord.cgi?id=hsa_circ_0002456
hsa_circ:chr10:131943475-131959261	GLRX3	0	8.77903	0	0	-4.48731	0.350567	hsa_circ_0020498	http://www.circbase.org/cgi-bin/singlerecord.cgi?id=hsa_circ_0020498
hsa_circ:chr10:131964771-131969900	GLRX3	4.03674	0	6.78971	7.03422	1.78956	0.594139	hsa_circ_0020506	http://www.circbase.org/cgi-bin/singlerecord.cgi?id=hsa_circ_0020506
hsa_circ:chr10:13214376-13214765	MCM10	25.2296	43.0971	32.0086	43.3777	0.135742	0.860319	hsa_circ_0002109	http://www.circbase.org/cgi-bin/singlerecord.cgi?id=hsa_circ_0002109
hsa_circ:chr10:13214376-13217681	MCM10	0	6.38475	0	15.2408	1.24872	0.786492	hsa_circ_0000216	http://www.circbase.org/cgi-bin/singlerecord.cgi?id=hsa_circ_0000216
hsa_circ:chr10:13214376-13228280	MCM10	0	0	8.72963	0	4.72782	0.325779	NA	NA
hsa_circ:chr10:13233299-13234568	MCM10	4.03674	0	8.72963	0	1.12465	0.796408	hsa_circ_0004477	http://www.circbase.org/cgi-bin/singlerecord.cgi?id=hsa_circ_0004477
hsa_circ:chr10:13364835-13387028	SEPHS1	0	8.77903	0	0	-4.48731	0.350567	hsa_circ_0017803	http://www.circbase.org/cgi-bin/singlerecord.cgi?id=hsa_circ_0017803
hsa_circ:chr10:13370351-13371788	SEPHS1	7.06429	0	0	0	-4.16619	0.386659	NA	NA
hsa_circ:chr10:13370351-13387028	SEPHS1	0	0	0	3.51711	3.40518	0.482694	NA	NA
hsa_circ:chr10:133757472-133758963	PPP2R2D	0	10.3752	0	0	-4.72779	0.325009	hsa_circ_0020523	http://www.circbase.org/cgi-bin/singlerecord.cgi?id=hsa_circ_0020523
hsa_circ:chr10:13375817-13387028	SEPHS1	8.07348	7.18284	4.84979	0	-1.64097	0.600982	hsa_circ_0003136	http://www.circbase.org/cgi-bin/singlerecord.cgi?id=hsa_circ_0003136
hsa_circ:chr10:134503896-134523960	INPP5A	0	0	10.6695	12.8961	6.15704	0.0604079	hsa_circ_0020545	http://www.circbase.org/cgi-bin/singlerecord.cgi?id=hsa_circ_0020545
hsa_circ:chr10:14909082-14909908	HSPA14	0	3.19238	10.6695	0	1.73333	0.68342	NA	NA
hsa_circ:chr10:14938845-14939516	SUV39H2	0	0	1.93992	0	2.56807	0.600374	hsa_circ_0006780	http://www.circbase.org/cgi-bin/singlerecord.cgi?id=hsa_circ_0006780
hsa_circ:chr10:14968842-14977563	DCLRE1C	0	0	5.81975	0	4.14443	0.390315	NA	NA
hsa_circ:chr10:15182986-15183556	NMT2	0	4.78856	0	0	-3.61557	0.453691	NA	NA
hsa_circ:chr10:15290638-15296878	FAM171A1	5.04592	9.57713	0	10.5513	-0.479556	0.866255	hsa_circ_0017834	http://www.circbase.org/cgi-bin/singlerecord.cgi?id=hsa_circ_0017834
hsa_circ:chr10:15317854-15326104	FAM171A1	0	12.7695	8.72963	0	-0.547762	0.905334	NA	NA
hsa_circ:chr10:15858834-15889942	FAM188A	0	0	10.6695	0	5.01674	0.296603	hsa_circ_0000219	http://www.circbase.org/cgi-bin/singlerecord.cgi?id=hsa_circ_0000219
hsa_circ:chr10:15863655-15889942	FAM188A	0	14.3657	0	0	-5.19648	0.278824	hsa_circ_0000220	http://www.circbase.org/cgi-bin/singlerecord.cgi?id=hsa_circ_0000220
hsa_circ:chr10:15875629-15885271	FAM188A	0	3.99047	0	0	-3.3537	0.487777	hsa_circ_0005825	http://www.circbase.org/cgi-bin/singlerecord.cgi?id=hsa_circ_0005825
hsa_circ:chr10:15875629-15889942	FAM188A	6.05511	18.3562	7.75967	0	-1.64354	0.508705	hsa_circ_0006665	http://www.circbase.org/cgi-bin/singlerecord.cgi?id=hsa_circ_0006665
hsa_circ:chr10:16794538-16796988	RSU1	0	0	11.6395	0	5.14205	0.284521	hsa_circ_0005767	http://www.circbase.org/cgi-bin/singlerecord.cgi?id=hsa_circ_0005767
hsa_circ:chr10:17732091-17735311	STAM	0	0	3.87984	0	3.56175	0.462171	NA	NA
hsa_circ:chr10:17746430-17747740	STAM	0	0	13.5794	0	5.36411	0.261852	hsa_circ_0008311	http://www.circbase.org/cgi-bin/singlerecord.cgi?id=hsa_circ_0008311
hsa_circ:chr10:21884260-21906136	MLLT10	0	0	6.78971	0	4.36615	0.364903	NA	NA
hsa_circ:chr10:21901277-21906136	MLLT10	9.08266	0	0	0	-4.52967	0.345973	NA	NA
hsa_circ:chr10:22002701-22016857	MLLT10	17.1561	9.57713	0	0	-6.08958	0.0487123	hsa_circ_0007084	http://www.circbase.org/cgi-bin/singlerecord.cgi?id=hsa_circ_0007084
hsa_circ:chr10:22171211-22209892	DNAJC1	4.03674	6.38475	0	7.03422	-0.575681	0.86584	hsa_circ_0002618	http://www.circbase.org/cgi-bin/singlerecord.cgi?id=hsa_circ_0002618
hsa_circ:chr10:22193451-22209892	DNAJC1	15.1378	19.9523	0	0	-6.48339	0.0164204	hsa_circ_0004306	http://www.circbase.org/cgi-bin/singlerecord.cgi?id=hsa_circ_0004306
hsa_circ:chr10:22193451-22218070	DNAJC1	0	7.98094	0	0	-4.35014	0.36571	NA	NA
hsa_circ:chr10:225934-267296	ZMYND11	4.03674	21.5485	13.5794	11.7237	-0.021675	0.989422	hsa_circ_0008225	http://www.circbase.org/cgi-bin/singlerecord.cgi?id=hsa_circ_0008225
hsa_circ:chr10:22856780-22880710	PIP4K2A	7.06429	0	0	11.7237	0.732585	0.873791	NA	NA
hsa_circ:chr10:24955914-24959326	ARHGAP21	8.07348	0	0	0	-4.35935	0.364681	hsa_circ_0017991	http://www.circbase.org/cgi-bin/singlerecord.cgi?id=hsa_circ_0017991
hsa_circ:chr10:25226113-25231365	PRTFDC1	12.1102	0	0	0	-4.94551	0.30296	hsa_circ_0017995	http://www.circbase.org/cgi-bin/singlerecord.cgi?id=hsa_circ_0017995
hsa_circ:chr10:255829-267296	ZMYND11	0	0	5.81975	0	4.14443	0.390315	hsa_circ_0017361	http://www.circbase.org/cgi-bin/singlerecord.cgi?id=hsa_circ_0017361
hsa_circ:chr10:26994215-26998697	PDSS1	0	0	0	14.0684	5.41091	0.253109	hsa_circ_0001963	http://www.circbase.org/cgi-bin/singlerecord.cgi?id=hsa_circ_0001963
hsa_circ:chr10:27054147-27059274	ABI1	6.05511	12.7695	12.6095	0	-0.572596	0.820741	NA	NA
hsa_circ:chr10:27420788-27425314	YME1L1	0	13.5676	18.4292	0	0.441204	0.92343	hsa_circ_0005125	http://www.circbase.org/cgi-bin/singlerecord.cgi?id=hsa_circ_0005125
hsa_circ:chr10:27423760-27425314	YME1L1	0	0	0	17.5856	5.7333	0.232111	hsa_circ_0018025	http://www.circbase.org/cgi-bin/singlerecord.cgi?id=hsa_circ_0018025
hsa_circ:chr10:27447478-27448687	MASTL	2.01837	0	0	0	-2.34908	0.630393	NA	NA
hsa_circ:chr10:27453993-27454468	MASTL	0	19.1543	16.4893	11.7237	0.553596	0.816733	hsa_circ_0000225	http://www.circbase.org/cgi-bin/singlerecord.cgi?id=hsa_circ_0000225
hsa_circ:chr10:30315032-30318795	KIAA1462	0	9.57713	0	0	-4.61256	0.337098	hsa_circ_0018069	http://www.circbase.org/cgi-bin/singlerecord.cgi?id=hsa_circ_0018069
hsa_circ:chr10:30736711-30740673	MAP3K8	6.05511	0	0	0	-3.94312	0.413042	hsa_circ_0018079	http://www.circbase.org/cgi-bin/singlerecord.cgi?id=hsa_circ_0018079
hsa_circ:chr10:3143557-3151672	PFKP	7.06429	8.77903	0	0	-5.33599	0.179559	hsa_circ_0017476	http://www.circbase.org/cgi-bin/singlerecord.cgi?id=hsa_circ_0017476
hsa_circ:chr10:3160974-3162236	PFKP	49.4501	19.9523	50.4379	14.0684	-0.0967796	0.924633	hsa_circ_0006608	http://www.circbase.org/cgi-bin/singlerecord.cgi?id=hsa_circ_0006608
hsa_circ:chr10:3200232-3202522	PITRM1	0	0	13.5794	0	5.36411	0.261852	hsa_circ_0002498	http://www.circbase.org/cgi-bin/singlerecord.cgi?id=hsa_circ_0002498
hsa_circ:chr10:3201106-3202522	PITRM1	0	0	7.75967	0	4.55829	0.343757	hsa_circ_0017510	http://www.circbase.org/cgi-bin/singlerecord.cgi?id=hsa_circ_0017510
hsa_circ:chr10:32132389-32150586	ARHGAP12	0	0	0	11.7237	5.14754	0.284	hsa_circ_0008251	http://www.circbase.org/cgi-bin/singlerecord.cgi?id=hsa_circ_0008251
hsa_circ:chr10:32150323-32150586	ARHGAP12	0	4.78856	3.87984	7.03422	1.17717	0.742372	NA	NA
hsa_circ:chr10:32197100-32199491	ARHGAP12	208.901	187.552	238.61	202.82	0.157011	0.619441	hsa_circ_0000231	http://www.circbase.org/cgi-bin/singlerecord.cgi?id=hsa_circ_0000231
hsa_circ:chr10:32759992-32762951	CCDC7	6.05511	0	0	0	-3.94312	0.413042	hsa_circ_0002351	http://www.circbase.org/cgi-bin/singlerecord.cgi?id=hsa_circ_0002351
hsa_circ:chr10:33218750-33221528	ITGB1	3.02755	0	0	0	-2.93848	0.544567	NA	NA
hsa_circ:chr10:34558585-34573173	PARD3	37.3398	62.2513	37.8284	46.8948	-0.238588	0.720474	hsa_circ_0018168	http://www.circbase.org/cgi-bin/singlerecord.cgi?id=hsa_circ_0018168
hsa_circ:chr10:34620045-34649187	PARD3	0	8.77903	0	0	-4.48731	0.350567	hsa_circ_0002487	http://www.circbase.org/cgi-bin/singlerecord.cgi?id=hsa_circ_0002487
hsa_circ:chr10:34648075-34649187	PARD3	0	1.59619	0	0	-2.0415	0.676651	NA	NA
hsa_circ:chr10:34648075-34673182	PARD3	0	0	9.69959	0	4.8795	0.310232	hsa_circ_0005486	http://www.circbase.org/cgi-bin/singlerecord.cgi?id=hsa_circ_0005486
hsa_circ:chr10:34663802-34673182	PARD3	2.01837	0	0	0	-2.34908	0.630393	NA	NA
hsa_circ:chr10:34739245-34806087	PARD3	0	11.1733	13.5794	10.5513	1.10146	0.640946	hsa_circ_0018184	http://www.circbase.org/cgi-bin/singlerecord.cgi?id=hsa_circ_0018184
hsa_circ:chr10:35318416-35322201	CUL2	0	0	8.72963	0	4.72782	0.325779	NA	NA
hsa_circ:chr10:35349802-35360267	CUL2	11.101	0	14.5494	0	0.394963	0.931537	hsa_circ_0000234	http://www.circbase.org/cgi-bin/singlerecord.cgi?id=hsa_circ_0000234
hsa_circ:chr10:35467817-35495979	CREM	0	0	6.78971	0	4.36615	0.364903	hsa_circ_0018195	http://www.circbase.org/cgi-bin/singlerecord.cgi?id=hsa_circ_0018195
hsa_circ:chr10:35805451-35819171	CCNY	10.0918	0	8.72963	12.8961	1.10854	0.660178	hsa_circ_0000235	http://www.circbase.org/cgi-bin/singlerecord.cgi?id=hsa_circ_0000235
hsa_circ:chr10:49609655-49613024	MAPK8	19.1745	0	8.72963	5.86185	-0.387312	0.876182	hsa_circ_0018315	http://www.circbase.org/cgi-bin/singlerecord.cgi?id=hsa_circ_0018315
hsa_circ:chr10:50690733-50701298	ERCC6	4.03674	0	0	0	-3.35581	0.487497	NA	NA
hsa_circ:chr10:50701163-50714058	ERCC6	11.101	0	22.3091	4.68948	1.29542	0.57775	hsa_circ_0006243	http://www.circbase.org/cgi-bin/singlerecord.cgi?id=hsa_circ_0006243
hsa_circ:chr10:50708584-50714058	ERCC6	0	22.3466	31.0387	15.2408	1.04649	0.672936	hsa_circ_0018331	http://www.circbase.org/cgi-bin/singlerecord.cgi?id=hsa_circ_0018331
hsa_circ:chr10:51040849-51051678	PARG	0	0	8.72963	0	4.72782	0.325779	NA	NA
hsa_circ:chr10:5690933-5695013	ASB13	0	0	7.75967	0	4.55829	0.343757	hsa_circ_0017555	http://www.circbase.org/cgi-bin/singlerecord.cgi?id=hsa_circ_0017555
hsa_circ:chr10:5815805-5842668	GDI2	22.2021	7.18284	0	0	-6.22529	0.0360474	hsa_circ_0017586	http://www.circbase.org/cgi-bin/singlerecord.cgi?id=hsa_circ_0017586
hsa_circ:chr10:5827105-5842668	GDI2	20.1837	23.9428	15.5193	12.8961	-0.634487	0.590359	hsa_circ_0005379	http://www.circbase.org/cgi-bin/singlerecord.cgi?id=hsa_circ_0005379
hsa_circ:chr10:5827815-5842668	GDI2	15.1378	0	0	0	-5.26792	0.272203	hsa_circ_0003351	http://www.circbase.org/cgi-bin/singlerecord.cgi?id=hsa_circ_0003351
hsa_circ:chr10:5836848-5842668	GDI2	76.698	58.2608	72.7469	65.6528	0.039504	0.939817	hsa_circ_0002665	http://www.circbase.org/cgi-bin/singlerecord.cgi?id=hsa_circ_0002665
hsa_circ:chr10:5838726-5842668	GDI2	0	0	12.6095	0	5.25734	0.273709	hsa_circ_0002478	http://www.circbase.org/cgi-bin/singlerecord.cgi?id=hsa_circ_0002478
hsa_circ:chr10:5950888-5951257	FBXO18	6.05511	9.57713	0	0	-5.31698	0.184228	hsa_circ_0017599	http://www.circbase.org/cgi-bin/singlerecord.cgi?id=hsa_circ_0017599
hsa_circ:chr10:6139011-6143350	RBM17	0	0	0	4.68948	3.8221	0.429169	hsa_circ_0017605	http://www.circbase.org/cgi-bin/singlerecord.cgi?id=hsa_circ_0017605
hsa_circ:chr10:61592283-61612460	CCDC6	6.05511	0	11.6395	0	0.950328	0.835175	NA	NA
hsa_circ:chr10:61844360-61845011	ANK3	7.06429	0	0	0	-4.16619	0.386659	NA	NA
hsa_circ:chr10:61865663-61898845	ANK3	8.07348	0	8.72963	0	0.119854	0.979063	NA	NA
hsa_circ:chr10:61894029-61898845	ANK3	0	0	8.72963	0	4.72782	0.325779	NA	NA
hsa_circ:chr10:62021617-62039397	ANK3	0	0	18.4292	7.03422	6.27038	0.0484828	hsa_circ_0018440	http://www.circbase.org/cgi-bin/singlerecord.cgi?id=hsa_circ_0018440
hsa_circ:chr10:62544463-62552047	CDK1	0	0	10.6695	0	5.01674	0.296603	NA	NA
hsa_circ:chr10:63699942-63760080	ARID5B	0	0	7.75967	0	4.55829	0.343757	hsa_circ_0005751	http://www.circbase.org/cgi-bin/singlerecord.cgi?id=hsa_circ_0005751
hsa_circ:chr10:63810647-63829556	ARID5B	0	12.7695	0	0	-5.02682	0.294991	hsa_circ_0018456	http://www.circbase.org/cgi-bin/singlerecord.cgi?id=hsa_circ_0018456
hsa_circ:chr10:64936057-64944498	JMJD1C	0	5.58666	0	0	-3.83712	0.425951	NA	NA
hsa_circ:chr10:65140078-65140242	JMJD1C	0	3.99047	0	0	-3.3537	0.487777	hsa_circ_0006743	http://www.circbase.org/cgi-bin/singlerecord.cgi?id=hsa_circ_0006743
hsa_circ:chr10:65369947-65379560	REEP3	0	0	0	16.4132	5.63365	0.240419	hsa_circ_0007626	http://www.circbase.org/cgi-bin/singlerecord.cgi?id=hsa_circ_0007626
hsa_circ:chr10:69647175-69651312	SIRT1	6.05511	0	0	0	-3.94312	0.413042	NA	NA
hsa_circ:chr10:69647175-69667882	SIRT1	0	0	0	8.20659	4.63195	0.335868	NA	NA
hsa_circ:chr10:69651160-69669199	SIRT1	0	7.98094	0	0	-4.35014	0.36571	NA	NA
hsa_circ:chr10:69700696-69714887	HERC4	0	3.99047	0	0	-3.3537	0.487777	NA	NA
hsa_circ:chr10:69773783-69804320	HERC4	8.07348	0	0	0	-4.35935	0.364681	hsa_circ_0003259	http://www.circbase.org/cgi-bin/singlerecord.cgi?id=hsa_circ_0003259
hsa_circ:chr10:69785303-69804320	HERC4	3.02755	3.99047	0	12.8961	0.871994	0.786353	hsa_circ_0007113	http://www.circbase.org/cgi-bin/singlerecord.cgi?id=hsa_circ_0007113
hsa_circ:chr10:70096956-70098399	HNRNPH3	3.02755	0	0	0	-2.93848	0.544567	NA	NA
hsa_circ:chr10:70190193-70190417	DNA2	8.07348	0	0	2.34474	-1.79206	0.69269	NA	NA
hsa_circ:chr10:70218861-70229920	DNA2	15.1378	16.76	25.2189	0	-0.335028	0.889872	hsa_circ_0009172	http://www.circbase.org/cgi-bin/singlerecord.cgi?id=hsa_circ_0009172
hsa_circ:chr10:70225424-70228063	DNA2	0	0	1.93992	0	2.56807	0.600374	NA	NA
hsa_circ:chr10:70227880-70229920	DNA2	129.176	87.7903	54.3177	79.7212	-0.695907	0.150691	hsa_circ_0006151	http://www.circbase.org/cgi-bin/singlerecord.cgi?id=hsa_circ_0006151
hsa_circ:chr10:70246901-70248386	SLC25A16	5.04592	0	0	0	-3.67914	0.445627	hsa_circ_0018529	http://www.circbase.org/cgi-bin/singlerecord.cgi?id=hsa_circ_0018529
hsa_circ:chr10:70246901-70253327	SLC25A16	0	12.7695	27.1588	5.86185	1.36459	0.578055	hsa_circ_0003459	http://www.circbase.org/cgi-bin/singlerecord.cgi?id=hsa_circ_0003459
hsa_circ:chr10:70246901-70266475	SLC25A16	4.03674	12.7695	0	10.5513	-0.681796	0.803743	hsa_circ_0007778	http://www.circbase.org/cgi-bin/singlerecord.cgi?id=hsa_circ_0007778
hsa_circ:chr10:70496633-70502326	CCAR1	8.07348	0	0	0	-4.35935	0.364681	hsa_circ_0018542	http://www.circbase.org/cgi-bin/singlerecord.cgi?id=hsa_circ_0018542
hsa_circ:chr10:70497602-70507323	CCAR1	0	0	6.78971	0	4.36615	0.364903	hsa_circ_0018546	http://www.circbase.org/cgi-bin/singlerecord.cgi?id=hsa_circ_0018546
hsa_circ:chr10:70506918-70507323	CCAR1	0	0	7.75967	0	4.55829	0.343757	hsa_circ_0018553	http://www.circbase.org/cgi-bin/singlerecord.cgi?id=hsa_circ_0018553
hsa_circ:chr10:70545893-70546449	CCAR1	8.07348	0	0	0	-4.35935	0.364681	hsa_circ_0002371	http://www.circbase.org/cgi-bin/singlerecord.cgi?id=hsa_circ_0002371
hsa_circ:chr10:70719562-70720005	DDX21	12.1102	16.76	26.1889	39.8606	1.18852	0.231757	hsa_circ_0008865	http://www.circbase.org/cgi-bin/singlerecord.cgi?id=hsa_circ_0008865
hsa_circ:chr10:70719562-70723225	DDX21	0	0	6.78971	0	4.36615	0.364903	NA	NA
hsa_circ:chr10:70719562-70725250	DDX21	0	0	0	9.37896	4.82502	0.315758	hsa_circ_0018565	http://www.circbase.org/cgi-bin/singlerecord.cgi?id=hsa_circ_0018565
hsa_circ:chr10:70723047-70726959	DDX21	16.147	7.98094	0	0	-5.94149	0.0673977	hsa_circ_0008523	http://www.circbase.org/cgi-bin/singlerecord.cgi?id=hsa_circ_0008523
hsa_circ:chr10:70725133-70726959	DDX21	6.05511	0	0	0	-3.94312	0.413042	hsa_circ_0018575	http://www.circbase.org/cgi-bin/singlerecord.cgi?id=hsa_circ_0018575
hsa_circ:chr10:70726774-70731808	DDX21	12.1102	0	0	0	-4.94551	0.30296	NA	NA
hsa_circ:chr10:70728732-70731808	DDX21	6.05511	0	0	0	-3.94312	0.413042	hsa_circ_0018583	http://www.circbase.org/cgi-bin/singlerecord.cgi?id=hsa_circ_0018583
hsa_circ:chr10:70765488-70770771	KIF1BP	0	0	0	9.37896	4.82502	0.315758	NA	NA
hsa_circ:chr10:70915568-70917967	VPS26A	0	0	7.75967	0	4.55829	0.343757	NA	NA
hsa_circ:chr10:70945743-70947512	SUPV3L1	0	0	0	9.37896	4.82502	0.315758	hsa_circ_0018600	http://www.circbase.org/cgi-bin/singlerecord.cgi?id=hsa_circ_0018600
hsa_circ:chr10:70945743-70951522	SUPV3L1	0	9.57713	0	0	-4.61256	0.337098	hsa_circ_0006201	http://www.circbase.org/cgi-bin/singlerecord.cgi?id=hsa_circ_0006201
hsa_circ:chr10:71243447-71244971	TSPAN15	4.03674	14.3657	12.6095	9.37896	0.25263	0.893933	hsa_circ_0002758	http://www.circbase.org/cgi-bin/singlerecord.cgi?id=hsa_circ_0002758
hsa_circ:chr10:71243447-71258152	TSPAN15	0	10.3752	13.5794	15.2408	1.46161	0.508701	NA	NA
hsa_circ:chr10:72604230-72610967	SGPL1	0	0	0	7.03422	4.409	0.360117	NA	NA
hsa_circ:chr10:73956569-73973089	ASCC1	3.02755	0	0	0	-2.93848	0.544567	hsa_circ_0008145	http://www.circbase.org/cgi-bin/singlerecord.cgi?id=hsa_circ_0008145
hsa_circ:chr10:73963185-73970589	ASCC1	0	0	2.90988	0	3.1489	0.517345	hsa_circ_0018740	http://www.circbase.org/cgi-bin/singlerecord.cgi?id=hsa_circ_0018740
hsa_circ:chr10:74100547-74100928	DNAJB12	58.5327	38.3085	58.1975	60.9633	0.302673	0.614859	hsa_circ_0008662	http://www.circbase.org/cgi-bin/singlerecord.cgi?id=hsa_circ_0008662
hsa_circ:chr10:74167687-74183129	MICU1	0	1.59619	0	0	-2.0415	0.676651	NA	NA
hsa_circ:chr10:74167687-74268027	MICU1	0	0	4.84979	0	3.88232	0.42174	NA	NA
hsa_circ:chr10:74310937-74326552	MICU1	0	0	0	8.20659	4.63195	0.335868	NA	NA
hsa_circ:chr10:74322653-74326552	MICU1	0	11.9714	3.87984	4.68948	-0.488329	0.877054	hsa_circ_0006628	http://www.circbase.org/cgi-bin/singlerecord.cgi?id=hsa_circ_0006628
hsa_circ:chr10:74474869-74475660	MCU	45.4133	11.9714	31.0387	9.37896	-0.493583	0.651597	hsa_circ_0000247	http://www.circbase.org/cgi-bin/singlerecord.cgi?id=hsa_circ_0000247
hsa_circ:chr10:74831787-74834673	P4HA1	0	0	0	7.03422	4.409	0.360117	hsa_circ_0018774	http://www.circbase.org/cgi-bin/singlerecord.cgi?id=hsa_circ_0018774
hsa_circ:chr10:75206250-75227436	PPP3CB	9.08266	0	0	0	-4.52967	0.345973	NA	NA
hsa_circ:chr10:75296027-75299351	USP54	18.1653	3.19238	7.75967	10.5513	-0.217812	0.911114	hsa_circ_0004568	http://www.circbase.org/cgi-bin/singlerecord.cgi?id=hsa_circ_0004568
hsa_circ:chr10:75331179-75336119	USP54	9.08266	0	15.5193	0	0.778038	0.865699	hsa_circ_0007221	http://www.circbase.org/cgi-bin/singlerecord.cgi?id=hsa_circ_0007221
hsa_circ:chr10:75506388-75506762	SEC24C	6.05511	5.58666	0	2.34474	-2.32906	0.537961	hsa_circ_0004387	http://www.circbase.org/cgi-bin/singlerecord.cgi?id=hsa_circ_0004387
hsa_circ:chr10:75830428-75834661	VCL	0	8.77903	0	0	-4.48731	0.350567	hsa_circ_0018881	http://www.circbase.org/cgi-bin/singlerecord.cgi?id=hsa_circ_0018881
hsa_circ:chr10:75830428-75849956	VCL	0	0	0	4.68948	3.8221	0.429169	hsa_circ_0018883	http://www.circbase.org/cgi-bin/singlerecord.cgi?id=hsa_circ_0018883
hsa_circ:chr10:75854029-75855613	VCL	0	5.58666	6.78971	0	0.280139	0.948945	NA	NA
hsa_circ:chr10:75855414-75860855	VCL	12.1102	0	0	0	-4.94551	0.30296	hsa_circ_0018887	http://www.circbase.org/cgi-bin/singlerecord.cgi?id=hsa_circ_0018887
hsa_circ:chr10:75856962-75860855	VCL	11.101	0	0	0	-4.81976	0.315569	hsa_circ_0018889	http://www.circbase.org/cgi-bin/singlerecord.cgi?id=hsa_circ_0018889
hsa_circ:chr10:76153899-76158337	ADK	25.2296	23.1447	21.3391	15.2408	-0.400226	0.703972	hsa_circ_0009121	http://www.circbase.org/cgi-bin/singlerecord.cgi?id=hsa_circ_0009121
hsa_circ:chr10:76910272-76910864	SAMD8	0	10.3752	20.3691	0	0.971788	0.832463	hsa_circ_0006148	http://www.circbase.org/cgi-bin/singlerecord.cgi?id=hsa_circ_0006148
hsa_circ:chr10:76978821-76979114	VDAC2	6.05511	0	0	8.20659	0.440348	0.916987	hsa_circ_0007335	http://www.circbase.org/cgi-bin/singlerecord.cgi?id=hsa_circ_0007335
hsa_circ:chr10:7839010-7844817	ATP5C1	61.5603	51.078	0	89.1002	-0.33892	0.906864	hsa_circ_0007292	http://www.circbase.org/cgi-bin/singlerecord.cgi?id=hsa_circ_0007292
hsa_circ:chr10:79613112-79614128	DLG5	39.3582	43.8952	29.0988	15.2408	-0.90364	0.278431	hsa_circ_0006649	http://www.circbase.org/cgi-bin/singlerecord.cgi?id=hsa_circ_0006649
hsa_circ:chr10:79613112-79616650	DLG5	21.1929	10.3752	0	0	-6.32919	0.0265324	hsa_circ_0018937	http://www.circbase.org/cgi-bin/singlerecord.cgi?id=hsa_circ_0018937
hsa_circ:chr10:79613112-79628955	DLG5	12.1102	0	18.4292	0	0.609833	0.894355	NA	NA
hsa_circ:chr10:79739899-79741317	POLR3A	0	4.78856	0	3.51711	-0.459756	0.919979	NA	NA
hsa_circ:chr10:79741912-79744056	POLR3A	0	14.3657	40.7383	5.86185	1.69276	0.51517	hsa_circ_0007310	http://www.circbase.org/cgi-bin/singlerecord.cgi?id=hsa_circ_0007310
hsa_circ:chr10:79761955-79764646	POLR3A	15.1378	0	0	0	-5.26792	0.272203	NA	NA
hsa_circ:chr10:79761955-79767624	POLR3A	0	0	16.4893	0	5.64383	0.239561	NA	NA
hsa_circ:chr10:79764474-79770298	POLR3A	0	0	4.84979	0	3.88232	0.42174	NA	NA
hsa_circ:chr10:80878672-80976031	ZMIZ1	10.0918	2.39428	0	0	-4.99028	0.252367	hsa_circ_0002582	http://www.circbase.org/cgi-bin/singlerecord.cgi?id=hsa_circ_0002582
hsa_circ:chr10:80899439-80976031	ZMIZ1	7.06429	0	0	0	-4.16619	0.386659	NA	NA
hsa_circ:chr10:80961341-80976031	ZMIZ1	13.1194	7.98094	12.6095	49.2396	1.55221	0.182989	hsa_circ_0003605	http://www.circbase.org/cgi-bin/singlerecord.cgi?id=hsa_circ_0003605
hsa_circ:chr10:82266984-82269227	TSPAN14	23.2112	40.7028	39.7683	10.5513	-0.340576	0.723251	hsa_circ_0008856	http://www.circbase.org/cgi-bin/singlerecord.cgi?id=hsa_circ_0008856
hsa_circ:chr10:86177527-86185649	CCSER2	82.7531	73.4246	0	91.4449	-0.772941	0.789968	hsa_circ_0006956	http://www.circbase.org/cgi-bin/singlerecord.cgi?id=hsa_circ_0006956
hsa_circ:chr10:86177527-86198463	CCSER2	25.2296	27.9333	26.1889	36.3435	0.231244	0.788579	hsa_circ_0003018	http://www.circbase.org/cgi-bin/singlerecord.cgi?id=hsa_circ_0003018
hsa_circ:chr10:86177527-86237420	CCSER2	0	0	0	7.03422	4.409	0.360117	hsa_circ_0018996	http://www.circbase.org/cgi-bin/singlerecord.cgi?id=hsa_circ_0018996
hsa_circ:chr10:86198268-86237420	CCSER2	0	3.19238	0	8.20659	1.34857	0.76204	hsa_circ_0018998	http://www.circbase.org/cgi-bin/singlerecord.cgi?id=hsa_circ_0018998
hsa_circ:chr10:88212977-88213588	WAPL	0	5.58666	0	0	-3.83712	0.425951	NA	NA
hsa_circ:chr10:88212977-88220253	WAPL	0	2.39428	0	0	-2.6212	0.590064	NA	NA
hsa_circ:chr10:882343-890995	LARP4B	0	8.77903	0	0	-4.48731	0.350567	hsa_circ_0008837	http://www.circbase.org/cgi-bin/singlerecord.cgi?id=hsa_circ_0008837
hsa_circ:chr10:89527430-89536184	ATAD1	0	0	0	28.1369	6.41197	0.18097	hsa_circ_0007229	http://www.circbase.org/cgi-bin/singlerecord.cgi?id=hsa_circ_0007229
hsa_circ:chr10:909683-910210	LARP4B	48.4409	71.8284	115.425	105.513	0.87355	0.0668635	hsa_circ_0017412	http://www.circbase.org/cgi-bin/singlerecord.cgi?id=hsa_circ_0017412
hsa_circ:chr10:909683-931700	LARP4B	33.3031	0	43.6482	35.1711	1.24571	0.639185	hsa_circ_0005772	http://www.circbase.org/cgi-bin/singlerecord.cgi?id=hsa_circ_0005772
hsa_circ:chr10:91371453-91371805	PANK1	0	0	1.93992	0	2.56807	0.600374	NA	NA
hsa_circ:chr10:91511103-91522592	KIF20B	0	0	2.90988	0	3.1489	0.517345	hsa_circ_0019079	http://www.circbase.org/cgi-bin/singlerecord.cgi?id=hsa_circ_0019079
hsa_circ:chr10:93185038-93221941	HECTD2	0	4.78856	0	0	-3.61557	0.453691	hsa_circ_0007168	http://www.circbase.org/cgi-bin/singlerecord.cgi?id=hsa_circ_0007168
hsa_circ:chr10:93590680-93602148	TNKS2	0	4.78856	0	0	-3.61557	0.453691	hsa_circ_0008170	http://www.circbase.org/cgi-bin/singlerecord.cgi?id=hsa_circ_0008170
hsa_circ:chr10:93608140-93609351	TNKS2	0	9.57713	0	0	-4.61256	0.337098	hsa_circ_0019116	http://www.circbase.org/cgi-bin/singlerecord.cgi?id=hsa_circ_0019116
hsa_circ:chr10:93608140-93611093	TNKS2	25.2296	0	0	12.8961	-0.96916	0.832743	hsa_circ_0008332	http://www.circbase.org/cgi-bin/singlerecord.cgi?id=hsa_circ_0008332
hsa_circ:chr10:93699709-93702325	BTAF1	6.05511	3.99047	0	0	-4.67764	0.295931	hsa_circ_0019120	http://www.circbase.org/cgi-bin/singlerecord.cgi?id=hsa_circ_0019120
hsa_circ:chr10:93751876-93768032	BTAF1	0	0	0	5.86185	4.14518	0.390227	hsa_circ_0005975	http://www.circbase.org/cgi-bin/singlerecord.cgi?id=hsa_circ_0005975
hsa_circ:chr10:93754292-93757508	BTAF1	0	0	0	10.5513	4.99527	0.298708	hsa_circ_0019133	http://www.circbase.org/cgi-bin/singlerecord.cgi?id=hsa_circ_0019133
hsa_circ:chr10:93754292-93768032	BTAF1	12.1102	33.5199	17.4593	10.5513	-0.704995	0.562805	hsa_circ_0008148	http://www.circbase.org/cgi-bin/singlerecord.cgi?id=hsa_circ_0008148
hsa_circ:chr10:93756126-93757508	BTAF1	0	0	8.72963	0	4.72782	0.325779	hsa_circ_0003584	http://www.circbase.org/cgi-bin/singlerecord.cgi?id=hsa_circ_0003584
hsa_circ:chr10:93768586-93768965	BTAF1	0	0	4.84979	0	3.88232	0.42174	NA	NA
hsa_circ:chr10:93841077-93851701	CPEB3	0	13.5676	0	0	-5.11415	0.285394	hsa_circ_0004224	http://www.circbase.org/cgi-bin/singlerecord.cgi?id=hsa_circ_0004224
hsa_circ:chr10:93902786-93904869	CPEB3	0	0	0	3.51711	3.40518	0.482694	hsa_circ_0002435	http://www.circbase.org/cgi-bin/singlerecord.cgi?id=hsa_circ_0002435
hsa_circ:chr10:94396941-94399657	KIF11	0	2.39428	0	0	-2.6212	0.590064	NA	NA
hsa_circ:chr10:94396941-94405399	KIF11	0	3.99047	0	0	-3.3537	0.487777	NA	NA
hsa_circ:chr10:94407969-94410274	KIF11	0	3.99047	0	0	-3.3537	0.487777	NA	NA
hsa_circ:chr10:94653106-94659401	EXOC6	0	9.57713	8.72963	0	-0.133499	0.976544	hsa_circ_0019170	http://www.circbase.org/cgi-bin/singlerecord.cgi?id=hsa_circ_0019170
hsa_circ:chr10:94653106-94669388	EXOC6	0	6.38475	0	0	-4.02912	0.402745	hsa_circ_0019171	http://www.circbase.org/cgi-bin/singlerecord.cgi?id=hsa_circ_0019171
hsa_circ:chr10:95069777-95070400	MYOF	6.05511	0	0	0	-3.94312	0.413042	hsa_circ_0019182	http://www.circbase.org/cgi-bin/singlerecord.cgi?id=hsa_circ_0019182
hsa_circ:chr10:95072777-95076570	MYOF	0	0	10.6695	0	5.01674	0.296603	hsa_circ_0005392	http://www.circbase.org/cgi-bin/singlerecord.cgi?id=hsa_circ_0005392
hsa_circ:chr10:95107374-95109726	MYOF	0	14.3657	22.3091	18.7579	1.50702	0.50094	hsa_circ_0019198	http://www.circbase.org/cgi-bin/singlerecord.cgi?id=hsa_circ_0019198
hsa_circ:chr10:95140976-95148911	MYOF	64.5878	73.4246	24.249	36.3435	-1.19305	0.0608763	hsa_circ_0005898	http://www.circbase.org/cgi-bin/singlerecord.cgi?id=hsa_circ_0005898
hsa_circ:chr10:96005703-96006378	PLCE1	2.01837	7.98094	14.5494	8.20659	1.18021	0.58871	hsa_circ_0019225	http://www.circbase.org/cgi-bin/singlerecord.cgi?id=hsa_circ_0019225
hsa_circ:chr10:96201653-96234540	TBC1D12	0	39.1066	31.0387	0	-0.333134	0.941955	hsa_circ_0008874	http://www.circbase.org/cgi-bin/singlerecord.cgi?id=hsa_circ_0008874
hsa_circ:chr10:96201653-96267104	TBC1D12	0	8.77903	0	0	-4.48731	0.350567	hsa_circ_0006650	http://www.circbase.org/cgi-bin/singlerecord.cgi?id=hsa_circ_0006650
hsa_circ:chr10:96201653-96282210	TBC1D12	0	0	2.90988	0	3.1489	0.517345	NA	NA
hsa_circ:chr10:96234425-96260084	TBC1D12	0	7.18284	0	0	-4.19854	0.382922	hsa_circ_0006750	http://www.circbase.org/cgi-bin/singlerecord.cgi?id=hsa_circ_0006750
hsa_circ:chr10:96234425-96271411	TBC1D12	0	11.1733	0	0	-4.8345	0.314073	NA	NA
hsa_circ:chr10:96256812-96271411	TBC1D12	0	0	3.87984	0	3.56175	0.462171	hsa_circ_0002244	http://www.circbase.org/cgi-bin/singlerecord.cgi?id=hsa_circ_0002244
hsa_circ:chr10:96998325-97007123	PDLIM1	0	6.38475	0	0	-4.02912	0.402745	NA	NA
hsa_circ:chr10:97376234-97381008	ALDH18A1	3.02755	0	0	0	-2.93848	0.544567	hsa_circ_0019259	http://www.circbase.org/cgi-bin/singlerecord.cgi?id=hsa_circ_0019259
hsa_circ:chr10:97392716-97397193	ALDH18A1	0	3.19238	0	0	-3.03348	0.531288	NA	NA
hsa_circ:chr10:97396850-97402963	ALDH18A1	0	21.5485	0	0	-5.78073	0.22787	hsa_circ_0004882	http://www.circbase.org/cgi-bin/singlerecord.cgi?id=hsa_circ_0004882
hsa_circ:chr10:98303833-98319493	TM9SF3	0	8.77903	0	0	-4.48731	0.350567	hsa_circ_0019297	http://www.circbase.org/cgi-bin/singlerecord.cgi?id=hsa_circ_0019297
hsa_circ:chr10:98303833-98325183	TM9SF3	0	9.57713	9.69959	0	0.0181772	0.99683	hsa_circ_0005801	http://www.circbase.org/cgi-bin/singlerecord.cgi?id=hsa_circ_0005801
hsa_circ:chr10:98703870-98711953	LCOR	8.07348	0	11.6395	0	0.533939	0.907762	hsa_circ_0008102	http://www.circbase.org/cgi-bin/singlerecord.cgi?id=hsa_circ_0008102
hsa_circ:chr10:98994974-99003916	ARHGAP19,ARHGAP19-SLIT1	2.01837	0	0	0	-2.34908	0.630393	NA	NA
hsa_circ:chr10:99148009-99148381	RRP12	0	0	11.6395	21.1027	6.63088	0.0179727	hsa_circ_0019337	http://www.circbase.org/cgi-bin/singlerecord.cgi?id=hsa_circ_0019337
hsa_circ:chr10:99196948-99197507	EXOSC1	32.2939	32.7218	25.2189	25.7922	-0.350246	0.682062	hsa_circ_0004896	http://www.circbase.org/cgi-bin/singlerecord.cgi?id=hsa_circ_0004896
hsa_circ:chr10:99196948-99201016	EXOSC1	0	5.58666	0	0	-3.83712	0.425951	NA	NA
hsa_circ:chr10:99236440-99240799	MMS19	0	0	5.81975	0	4.14443	0.390315	NA	NA
hsa_circ:chr10:99327671-99327898	UBTD1	0	0	0	17.5856	5.7333	0.232111	NA	NA
hsa_circ:chr10:99502851-99504672	ZFYVE27	0	10.3752	0	0	-4.72779	0.325009	hsa_circ_0003168	http://www.circbase.org/cgi-bin/singlerecord.cgi?id=hsa_circ_0003168
hsa_circ:chr10:99915850-99923154	R3HCC1L	14.1286	27.1352	0	19.9303	-1.05579	0.665563	hsa_circ_0004419	http://www.circbase.org/cgi-bin/singlerecord.cgi?id=hsa_circ_0004419
hsa_circ:chr11:1000432-1003804	AP2A2	13.1194	0	0	0	-5.06117	0.291667	hsa_circ_0020749	http://www.circbase.org/cgi-bin/singlerecord.cgi?id=hsa_circ_0020749
hsa_circ:chr11:992503-1000598	AP2A2	0	0	8.72963	0	4.72782	0.325779	NA	NA
hsa_circ:chr11:100730285-100792335	ARHGAP42	0	7.18284	0	0	-4.19854	0.382922	NA	NA
hsa_circ:chr11:102056749-102076805	YAP1	0	0	13.5794	0	5.36411	0.261852	hsa_circ_0002320	http://www.circbase.org/cgi-bin/singlerecord.cgi?id=hsa_circ_0002320
hsa_circ:chr11:102056749-102080295	YAP1	0	0	7.75967	0	4.55829	0.343757	hsa_circ_0004140	http://www.circbase.org/cgi-bin/singlerecord.cgi?id=hsa_circ_0004140
hsa_circ:chr11:102076624-102080295	YAP1	0	0	18.4292	5.86185	6.20256	0.056871	hsa_circ_0006286	http://www.circbase.org/cgi-bin/singlerecord.cgi?id=hsa_circ_0006286
hsa_circ:chr11:102233627-102239279	BIRC2	7.06429	5.58666	5.81975	0	-1.11025	0.735353	hsa_circ_0004103	http://www.circbase.org/cgi-bin/singlerecord.cgi?id=hsa_circ_0004103
hsa_circ:chr11:107260800-107263621	CWF19L2	4.03674	11.1733	14.5494	0	-0.0608961	0.981483	NA	NA
hsa_circ:chr11:107260800-107289013	CWF19L2	9.08266	5.58666	19.3992	0	0.410153	0.866707	hsa_circ_0006868	http://www.circbase.org/cgi-bin/singlerecord.cgi?id=hsa_circ_0006868
hsa_circ:chr11:107673727-107677602	SLC35F2	5.04592	0	5.81975	7.03422	1.35968	0.685551	hsa_circ_0024165	http://www.circbase.org/cgi-bin/singlerecord.cgi?id=hsa_circ_0024165
hsa_circ:chr11:107677443-107686691	SLC35F2	0	0	0	3.51711	3.40518	0.482694	NA	NA
hsa_circ:chr11:107940823-107944224	CUL5	0	11.1733	0	0	-4.8345	0.314073	NA	NA
hsa_circ:chr11:108046973-108047817	NPAT	22.2021	0	11.6395	8.20659	-0.156602	0.951101	hsa_circ_0006208	http://www.circbase.org/cgi-bin/singlerecord.cgi?id=hsa_circ_0006208
hsa_circ:chr11:108098322-108106561	ATM	0	5.58666	0	0	-3.83712	0.425951	hsa_circ_0003641	http://www.circbase.org/cgi-bin/singlerecord.cgi?id=hsa_circ_0003641
hsa_circ:chr11:108139137-108142133	ATM	0	0	0	3.51711	3.40518	0.482694	NA	NA
hsa_circ:chr11:10822509-10824841	EIF4G2	0	6.38475	0	0	-4.02912	0.402745	NA	NA
hsa_circ:chr11:108559663-108564327	DDX10	3.02755	0	7.75967	0	1.37209	0.75982	NA	NA
hsa_circ:chr11:108559663-108577564	DDX10	0	3.19238	0	0	-3.03348	0.531288	hsa_circ_0024246	http://www.circbase.org/cgi-bin/singlerecord.cgi?id=hsa_circ_0024246
hsa_circ:chr11:108559663-108594189	DDX10	0	0	0	19.9303	5.91406	0.21757	hsa_circ_0024247	http://www.circbase.org/cgi-bin/singlerecord.cgi?id=hsa_circ_0024247
hsa_circ:chr11:108586606-108594189	DDX10	8.07348	4.78856	0	0	-5.03416	0.242028	hsa_circ_0024251	http://www.circbase.org/cgi-bin/singlerecord.cgi?id=hsa_circ_0024251
hsa_circ:chr11:108593724-108594189	DDX10	0	0	0	8.20659	4.63195	0.335868	hsa_circ_0024256	http://www.circbase.org/cgi-bin/singlerecord.cgi?id=hsa_circ_0024256
hsa_circ:chr11:110007388-110008139	ZC3H12C	0	0	0	9.37896	4.82502	0.315758	hsa_circ_0005348	http://www.circbase.org/cgi-bin/singlerecord.cgi?id=hsa_circ_0005348
hsa_circ:chr11:111622883-111624301	PPP2R1B	0	4.78856	4.84979	0	0.0179616	0.996826	hsa_circ_0024271	http://www.circbase.org/cgi-bin/singlerecord.cgi?id=hsa_circ_0024271
hsa_circ:chr11:111625223-111626174	PPP2R1B	11.101	0	0	0	-4.81976	0.315569	hsa_circ_0024273	http://www.circbase.org/cgi-bin/singlerecord.cgi?id=hsa_circ_0024273
hsa_circ:chr11:111907997-111910121	DLAT	0	3.19238	0	0	-3.03348	0.531288	hsa_circ_0024295	http://www.circbase.org/cgi-bin/singlerecord.cgi?id=hsa_circ_0024295
hsa_circ:chr11:11348633-11362551	GALNT18	6.05511	11.1733	7.75967	0	-1.14262	0.686351	NA	NA
hsa_circ:chr11:113711320-113725057	USP28	0	0	0	3.51711	3.40518	0.482694	hsa_circ_0024323	http://www.circbase.org/cgi-bin/singlerecord.cgi?id=hsa_circ_0024323
hsa_circ:chr11:113723223-113725057	USP28	0	0	2.90988	0	3.1489	0.517345	hsa_circ_0008103	http://www.circbase.org/cgi-bin/singlerecord.cgi?id=hsa_circ_0008103
hsa_circ:chr11:11454168-11470483	GALNT18	2.01837	0	0	0	-2.34908	0.630393	NA	NA
hsa_circ:chr11:116627862-116629123	BUD13	12.1102	0	0	29.3093	1.27663	0.78079	hsa_circ_0005032	http://www.circbase.org/cgi-bin/singlerecord.cgi?id=hsa_circ_0005032
hsa_circ:chr11:116628482-116631668	BUD13	0	10.3752	0	0	-4.72779	0.325009	NA	NA
hsa_circ:chr11:116629790-116636162	BUD13	0	8.77903	0	0	-4.48731	0.350567	NA	NA
hsa_circ:chr11:116734384-116744352	SIK3	0	14.3657	0	3.51711	-2.04095	0.646686	hsa_circ_0000357	http://www.circbase.org/cgi-bin/singlerecord.cgi?id=hsa_circ_0000357
hsa_circ:chr11:117023157-117031977	PAFAH1B2	8.07348	0	0	4.68948	-0.786292	0.857257	NA	NA
hsa_circ:chr11:117023157-117034608	PAFAH1B2	32.2939	51.078	70.807	41.033	0.42324	0.521363	hsa_circ_0007827	http://www.circbase.org/cgi-bin/singlerecord.cgi?id=hsa_circ_0007827
hsa_circ:chr11:117030650-117034608	PAFAH1B2	0	17.5581	0	16.4132	-0.100716	0.982489	hsa_circ_0004962	http://www.circbase.org/cgi-bin/singlerecord.cgi?id=hsa_circ_0004962
hsa_circ:chr11:117115161-117117664	RNF214	0	0	0	8.20659	4.63195	0.335868	NA	NA
hsa_circ:chr11:117241796-117242182	CEP164	3.02755	0	0	0	-2.93848	0.544567	NA	NA
hsa_circ:chr11:117973816-117975535	TMPRSS4	0	0	13.5794	0	5.36411	0.261852	NA	NA
hsa_circ:chr11:118347520-118348916	KMT2A	8.07348	0	0	0	-4.35935	0.364681	NA	NA
hsa_circ:chr11:118368651-118370135	KMT2A	4.03674	0	0	0	-3.35581	0.487497	hsa_circ_0004195	http://www.circbase.org/cgi-bin/singlerecord.cgi?id=hsa_circ_0004195
hsa_circ:chr11:118425174-118430579	IFT46	0	0	4.84979	0	3.88232	0.42174	hsa_circ_0008157	http://www.circbase.org/cgi-bin/singlerecord.cgi?id=hsa_circ_0008157
hsa_circ:chr11:118453894-118455359	ARCN1	4.03674	0	0	0	-3.35581	0.487497	hsa_circ_0007383	http://www.circbase.org/cgi-bin/singlerecord.cgi?id=hsa_circ_0007383
hsa_circ:chr11:118454524-118455359	ARCN1	13.1194	0	8.72963	0	-0.582119	0.899419	hsa_circ_0005589	http://www.circbase.org/cgi-bin/singlerecord.cgi?id=hsa_circ_0005589
hsa_circ:chr11:118625414-118627996	DDX6	0	10.3752	0	0	-4.72779	0.325009	hsa_circ_0024490	http://www.circbase.org/cgi-bin/singlerecord.cgi?id=hsa_circ_0024490
hsa_circ:chr11:118626969-118629611	DDX6	0	4.78856	0	0	-3.61557	0.453691	NA	NA
hsa_circ:chr11:118629483-118634015	DDX6	4.03674	0	0	0	-3.35581	0.487497	hsa_circ_0000360	http://www.circbase.org/cgi-bin/singlerecord.cgi?id=hsa_circ_0000360
hsa_circ:chr11:118650341-118657227	DDX6	0	0	0	11.7237	5.14754	0.284	hsa_circ_0006588	http://www.circbase.org/cgi-bin/singlerecord.cgi?id=hsa_circ_0006588
hsa_circ:chr11:118656761-118657227	DDX6	14.1286	17.5581	21.3391	4.68948	-0.278076	0.850902	hsa_circ_0004293	http://www.circbase.org/cgi-bin/singlerecord.cgi?id=hsa_circ_0004293
hsa_circ:chr11:118940944-118944661	VPS11	0	5.58666	0	0	-3.83712	0.425951	hsa_circ_0009166	http://www.circbase.org/cgi-bin/singlerecord.cgi?id=hsa_circ_0009166
hsa_circ:chr11:118997645-118997835	HINFP	0	0	3.87984	7.03422	5.04587	0.256013	hsa_circ_0008960	http://www.circbase.org/cgi-bin/singlerecord.cgi?id=hsa_circ_0008960
hsa_circ:chr11:118997645-119001664	HINFP	2.01837	0	14.5494	0	2.87169	0.47042	NA	NA
hsa_circ:chr11:119002245-119003929	HINFP	9.08266	0	0	0	-4.52967	0.345973	hsa_circ_0006932	http://www.circbase.org/cgi-bin/singlerecord.cgi?id=hsa_circ_0006932
hsa_circ:chr11:119050402-119050997	NLRX1	2.01837	11.1733	0	0	-5.07342	0.239575	hsa_circ_0024562	http://www.circbase.org/cgi-bin/singlerecord.cgi?id=hsa_circ_0024562
hsa_circ:chr11:119103158-119103405	CBL	13.1194	0	0	0	-5.06117	0.291667	hsa_circ_0007665	http://www.circbase.org/cgi-bin/singlerecord.cgi?id=hsa_circ_0007665
hsa_circ:chr11:119144578-119145663	CBL	0	20.7504	11.6395	0	-0.833054	0.856069	hsa_circ_0000362	http://www.circbase.org/cgi-bin/singlerecord.cgi?id=hsa_circ_0000362
hsa_circ:chr11:119155679-119156276	CBL	0	0	0	5.86185	4.14518	0.390227	NA	NA
hsa_circ:chr11:120343759-120348235	ARHGEF12	0	0	0	10.5513	4.99527	0.298708	hsa_circ_0009021	http://www.circbase.org/cgi-bin/singlerecord.cgi?id=hsa_circ_0009021
hsa_circ:chr11:120346049-120348235	ARHGEF12	3.02755	0	0	0	-2.93848	0.544567	hsa_circ_0002955	http://www.circbase.org/cgi-bin/singlerecord.cgi?id=hsa_circ_0002955
hsa_circ:chr11:120347370-120348235	ARHGEF12	17.1561	0	0	8.20659	-1.06554	0.816966	hsa_circ_0002089	http://www.circbase.org/cgi-bin/singlerecord.cgi?id=hsa_circ_0002089
hsa_circ:chr11:121358741-121367758	SORL1	0	11.1733	7.75967	0	-0.524954	0.908209	NA	NA
hsa_circ:chr11:12159937-12183966	MICAL2	0	5.58666	0	9.37896	0.737054	0.858461	hsa_circ_0007192	http://www.circbase.org/cgi-bin/singlerecord.cgi?id=hsa_circ_0007192
hsa_circ:chr11:12183626-12183966	MICAL2	0	0	0	10.5513	4.99527	0.298708	NA	NA
hsa_circ:chr11:12247718-12248678	MICAL2	10.0918	0	13.5794	0	0.433334	0.924954	hsa_circ_0021284	http://www.circbase.org/cgi-bin/singlerecord.cgi?id=hsa_circ_0021284
hsa_circ:chr11:122646927-122647918	UBASH3B	4.03674	0	24.249	0	2.59508	0.574567	hsa_circ_0003391	http://www.circbase.org/cgi-bin/singlerecord.cgi?id=hsa_circ_0003391
hsa_circ:chr11:124517261-124518071	SIAE	0	9.57713	15.5193	11.7237	1.49668	0.514433	hsa_circ_0000367	http://www.circbase.org/cgi-bin/singlerecord.cgi?id=hsa_circ_0000367
hsa_circ:chr11:125472198-125474142	STT3A	0	4.78856	0	0	-3.61557	0.453691	hsa_circ_0024766	http://www.circbase.org/cgi-bin/singlerecord.cgi?id=hsa_circ_0024766
hsa_circ:chr11:126142864-126143349	FOXRED1	10.0918	23.1447	0	0	-6.40592	0.0215705	hsa_circ_0002019	http://www.circbase.org/cgi-bin/singlerecord.cgi?id=hsa_circ_0002019
hsa_circ:chr11:12785726-12785981	TEAD1	29.2664	29.5295	23.279	46.8948	0.250881	0.761936	NA	NA
hsa_circ:chr11:128932175-128936763	ARHGAP32	4.03674	4.78856	0	0	-4.49185	0.320334	hsa_circ_0024840	http://www.circbase.org/cgi-bin/singlerecord.cgi?id=hsa_circ_0024840
hsa_circ:chr11:128963516-128994789	ARHGAP32	0	0	0	5.86185	4.14518	0.390227	hsa_circ_0002984	http://www.circbase.org/cgi-bin/singlerecord.cgi?id=hsa_circ_0002984
hsa_circ:chr11:128963516-129034322	ARHGAP32	0	0	3.87984	0	3.56175	0.462171	hsa_circ_0024843	http://www.circbase.org/cgi-bin/singlerecord.cgi?id=hsa_circ_0024843
hsa_circ:chr11:128993341-129034322	ARHGAP32	6.05511	12.7695	0	3.51711	-2.43987	0.417483	hsa_circ_0007843	http://www.circbase.org/cgi-bin/singlerecord.cgi?id=hsa_circ_0007843
hsa_circ:chr11:12901255-12904672	TEAD1	10.0918	0	0	0	-4.682	0.329779	NA	NA
hsa_circ:chr11:12901255-12923660	TEAD1	0	9.57713	0	0	-4.61256	0.337098	hsa_circ_0003015	http://www.circbase.org/cgi-bin/singlerecord.cgi?id=hsa_circ_0003015
hsa_circ:chr11:129979324-129980556	APLP2	13.1194	6.38475	37.8284	12.8961	1.3893	0.277378	hsa_circ_0000372	http://www.circbase.org/cgi-bin/singlerecord.cgi?id=hsa_circ_0000372
hsa_circ:chr11:129979324-129992408	APLP2	3.02755	0	0	9.37896	1.63854	0.709669	NA	NA
hsa_circ:chr11:130130751-130131824	ZBTB44	20.1837	48.6837	54.3177	18.7579	0.0858454	0.920248	hsa_circ_0002484	http://www.circbase.org/cgi-bin/singlerecord.cgi?id=hsa_circ_0002484
hsa_circ:chr11:1307232-1311639	TOLLIP	0	0	11.6395	0	5.14205	0.284521	hsa_circ_0003379	http://www.circbase.org/cgi-bin/singlerecord.cgi?id=hsa_circ_0003379
hsa_circ:chr11:1307232-1317024	TOLLIP	5.04592	0	7.75967	25.7922	2.75486	0.223421	hsa_circ_0008301	http://www.circbase.org/cgi-bin/singlerecord.cgi?id=hsa_circ_0008301
hsa_circ:chr11:1309854-1311639	TOLLIP	0	6.38475	8.72963	0	0.449579	0.912801	hsa_circ_0020766	http://www.circbase.org/cgi-bin/singlerecord.cgi?id=hsa_circ_0020766
hsa_circ:chr11:1309854-1317024	TOLLIP	13.1194	0	0	0	-5.06117	0.291667	hsa_circ_0020767	http://www.circbase.org/cgi-bin/singlerecord.cgi?id=hsa_circ_0020767
hsa_circ:chr11:134063911-134064633	NCAPD3	9.08266	0	0	0	-4.52967	0.345973	hsa_circ_0024917	http://www.circbase.org/cgi-bin/singlerecord.cgi?id=hsa_circ_0024917
hsa_circ:chr11:13435077-13443385	BTBD10	18.1653	29.5295	21.3391	5.86185	-0.804147	0.510818	hsa_circ_0008967	http://www.circbase.org/cgi-bin/singlerecord.cgi?id=hsa_circ_0008967
hsa_circ:chr11:13435077-13466728	BTBD10	16.147	16.76	6.78971	0	-2.25937	0.297737	hsa_circ_0003234	http://www.circbase.org/cgi-bin/singlerecord.cgi?id=hsa_circ_0003234
hsa_circ:chr11:14316017-14317401	RRAS2	0	0	0	7.03422	4.409	0.360117	hsa_circ_0004429	http://www.circbase.org/cgi-bin/singlerecord.cgi?id=hsa_circ_0004429
hsa_circ:chr11:16863094-16877461	PLEKHA7	0	0	15.5193	0	5.55647	0.246999	hsa_circ_0021369	http://www.circbase.org/cgi-bin/singlerecord.cgi?id=hsa_circ_0021369
hsa_circ:chr11:16863094-16892729	PLEKHA7	0	7.98094	0	0	-4.35014	0.36571	hsa_circ_0021370	http://www.circbase.org/cgi-bin/singlerecord.cgi?id=hsa_circ_0021370
hsa_circ:chr11:16872738-16877461	PLEKHA7	13.1194	0	0	8.20659	-0.677988	0.883013	hsa_circ_0021371	http://www.circbase.org/cgi-bin/singlerecord.cgi?id=hsa_circ_0021371
hsa_circ:chr11:16872738-16892729	PLEKHA7	0	2.39428	0	0	-2.6212	0.590064	NA	NA
hsa_circ:chr11:17124209-17136012	PIK3C2A	0	3.19238	0	0	-3.03348	0.531288	NA	NA
hsa_circ:chr11:17153463-17167489	PIK3C2A	9.08266	0	0	0	-4.52967	0.345973	hsa_circ_0021396	http://www.circbase.org/cgi-bin/singlerecord.cgi?id=hsa_circ_0021396
hsa_circ:chr11:17156366-17167489	PIK3C2A	0	0	4.84979	0	3.88232	0.42174	NA	NA
hsa_circ:chr11:17190224-17191353	PIK3C2A	0	0	0	15.2408	5.5266	0.249579	hsa_circ_0003577	http://www.circbase.org/cgi-bin/singlerecord.cgi?id=hsa_circ_0003577
hsa_circ:chr11:17981017-18029623	ENSG00000255448.1,SERGEF	0	5.58666	0	0	-3.83712	0.425951	NA	NA
hsa_circ:chr11:18010144-18029623	ENSG00000255448.1,SERGEF	0	0	20.3691	0	5.94835	0.214889	hsa_circ_0021412	http://www.circbase.org/cgi-bin/singlerecord.cgi?id=hsa_circ_0021412
hsa_circ:chr11:18105082-18111057	SAAL1	0	0	7.75967	0	4.55829	0.343757	hsa_circ_0002778	http://www.circbase.org/cgi-bin/singlerecord.cgi?id=hsa_circ_0002778
hsa_circ:chr11:18305342-18307006	HPS5	0	0	4.84979	15.2408	5.92567	0.0954897	hsa_circ_0007484	http://www.circbase.org/cgi-bin/singlerecord.cgi?id=hsa_circ_0007484
hsa_circ:chr11:18312989-18313566	HPS5	0	3.19238	0	0	-3.03348	0.531288	hsa_circ_0000279	http://www.circbase.org/cgi-bin/singlerecord.cgi?id=hsa_circ_0000279
hsa_circ:chr11:18312989-18314523	HPS5	15.1378	0	0	0	-5.26792	0.272203	hsa_circ_0000280	http://www.circbase.org/cgi-bin/singlerecord.cgi?id=hsa_circ_0000280
hsa_circ:chr11:18424387-18425358	LDHA	7.06429	0	0	0	-4.16619	0.386659	hsa_circ_0021453	http://www.circbase.org/cgi-bin/singlerecord.cgi?id=hsa_circ_0021453
hsa_circ:chr11:20417349-20419267	PRMT3	3.02755	0	3.87984	0	0.37505	0.935256	hsa_circ_0021500	http://www.circbase.org/cgi-bin/singlerecord.cgi?id=hsa_circ_0021500
hsa_circ:chr11:20424465-20429578	PRMT3	0	6.38475	0	0	-4.02912	0.402745	NA	NA
hsa_circ:chr11:238998-244761	PSMD13	0	0	13.5794	0	5.36411	0.261852	NA	NA
hsa_circ:chr11:2591858-2593339	KCNQ1	0	0	0	17.5856	5.7333	0.232111	NA	NA
hsa_circ:chr11:2591858-2594216	KCNQ1	9.08266	15.9619	0	24.6198	-0.0296369	0.990634	NA	NA
hsa_circ:chr11:28056934-28058211	KIF18A	0	0	0	8.20659	4.63195	0.335868	NA	NA
hsa_circ:chr11:2979629-2991164	NAP1L4	0	1.59619	0	0	-2.0415	0.676651	NA	NA
hsa_circ:chr11:2991033-2993473	NAP1L4	4.03674	6.38475	3.87984	8.20659	0.209289	0.936861	hsa_circ_0020822	http://www.circbase.org/cgi-bin/singlerecord.cgi?id=hsa_circ_0020822
hsa_circ:chr11:2991033-3000467	NAP1L4	0	19.9523	0	0	-5.66981	0.236988	hsa_circ_0004132	http://www.circbase.org/cgi-bin/singlerecord.cgi?id=hsa_circ_0004132
hsa_circ:chr11:3060424-3063486	CARS	0	0	0	4.68948	3.8221	0.429169	NA	NA
hsa_circ:chr11:32610140-32611187	EIF3M	5.04592	10.3752	0	14.0684	-0.140696	0.957469	NA	NA
hsa_circ:chr11:32611093-32617593	EIF3M	15.1378	24.7409	0	9.37896	-2.10639	0.269937	hsa_circ_0003119	http://www.circbase.org/cgi-bin/singlerecord.cgi?id=hsa_circ_0003119
hsa_circ:chr11:32948703-32949669	QSER1	0	0	4.84979	0	3.88232	0.42174	hsa_circ_0021569	http://www.circbase.org/cgi-bin/singlerecord.cgi?id=hsa_circ_0021569
hsa_circ:chr11:33078661-33083272	TCP11L1	0	3.19238	0	0	-3.03348	0.531288	NA	NA
hsa_circ:chr11:33307959-33309057	HIPK3	105.964	203.514	161.013	178.2	0.128953	0.781514	hsa_circ_0000284	http://www.circbase.org/cgi-bin/singlerecord.cgi?id=hsa_circ_0000284
hsa_circ:chr11:34073968-34101312	CAPRIN1	0	0	3.87984	0	3.56175	0.462171	NA	NA
hsa_circ:chr11:34097783-34098189	CAPRIN1	0	7.98094	17.4593	0	1.12729	0.806475	NA	NA
hsa_circ:chr11:34101175-34104588	CAPRIN1	11.101	0	0	0	-4.81976	0.315569	NA	NA
hsa_circ:chr11:34110942-34112225	CAPRIN1	0	0	2.90988	0	3.1489	0.517345	hsa_circ_0021652	http://www.circbase.org/cgi-bin/singlerecord.cgi?id=hsa_circ_0021652
hsa_circ:chr11:34111726-34112225	CAPRIN1	0	0	7.75967	0	4.55829	0.343757	hsa_circ_0000288	http://www.circbase.org/cgi-bin/singlerecord.cgi?id=hsa_circ_0000288
hsa_circ:chr11:34111726-34113603	CAPRIN1	0	0	4.84979	0	3.88232	0.42174	hsa_circ_0004851	http://www.circbase.org/cgi-bin/singlerecord.cgi?id=hsa_circ_0004851
hsa_circ:chr11:34218872-34226237	ABTB2	0	11.1733	21.3391	14.0684	1.65105	0.404771	NA	NA
hsa_circ:chr11:34952951-35006275	PDHX	12.1102	0	0	0	-4.94551	0.30296	hsa_circ_0021708	http://www.circbase.org/cgi-bin/singlerecord.cgi?id=hsa_circ_0021708
hsa_circ:chr11:34969053-34991833	PDHX	0	4.78856	0	0	-3.61557	0.453691	hsa_circ_0006254	http://www.circbase.org/cgi-bin/singlerecord.cgi?id=hsa_circ_0006254
hsa_circ:chr11:34991686-35006275	PDHX	14.1286	13.5676	17.4593	4.68948	-0.316439	0.84614	hsa_circ_0000290	http://www.circbase.org/cgi-bin/singlerecord.cgi?id=hsa_circ_0000290
hsa_circ:chr11:35747472-35747711	TRIM44	0	0	4.84979	12.8961	5.74683	0.128057	NA	NA
hsa_circ:chr11:36248635-36248980	LDLRAD3	29.2664	47.0875	27.1588	0	-1.48792	0.544981	hsa_circ_0006988	http://www.circbase.org/cgi-bin/singlerecord.cgi?id=hsa_circ_0006988
hsa_circ:chr11:3707203-3716836	NUP98	5.04592	0	0	0	-3.67914	0.445627	hsa_circ_0020857	http://www.circbase.org/cgi-bin/singlerecord.cgi?id=hsa_circ_0020857
hsa_circ:chr11:3712577-3714605	NUP98	9.08266	10.3752	13.5794	0	-0.511974	0.834574	hsa_circ_0004146	http://www.circbase.org/cgi-bin/singlerecord.cgi?id=hsa_circ_0004146
hsa_circ:chr11:3712577-3716836	NUP98	0	5.58666	0	0	-3.83712	0.425951	hsa_circ_0006430	http://www.circbase.org/cgi-bin/singlerecord.cgi?id=hsa_circ_0006430
hsa_circ:chr11:3723693-3724122	NUP98	0	9.57713	0	0	-4.61256	0.337098	hsa_circ_0007605	http://www.circbase.org/cgi-bin/singlerecord.cgi?id=hsa_circ_0007605
hsa_circ:chr11:3726430-3742055	NUP98	7.06429	0	0	0	-4.16619	0.386659	hsa_circ_0020876	http://www.circbase.org/cgi-bin/singlerecord.cgi?id=hsa_circ_0020876
hsa_circ:chr11:3740642-3742055	NUP98	0	0	4.84979	0	3.88232	0.42174	NA	NA
hsa_circ:chr11:3740642-3746449	NUP98	0	0	0	17.5856	5.7333	0.232111	NA	NA
hsa_circ:chr11:3752621-3752808	NUP98	0	7.18284	0	0	-4.19854	0.382922	hsa_circ_0002350	http://www.circbase.org/cgi-bin/singlerecord.cgi?id=hsa_circ_0002350
hsa_circ:chr11:3752621-3756554	NUP98	6.05511	0	0	0	-3.94312	0.413042	hsa_circ_0004410	http://www.circbase.org/cgi-bin/singlerecord.cgi?id=hsa_circ_0004410
hsa_circ:chr11:3752621-3765879	NUP98	0	0	8.72963	0	4.72782	0.325779	hsa_circ_0008380	http://www.circbase.org/cgi-bin/singlerecord.cgi?id=hsa_circ_0008380
hsa_circ:chr11:3752621-3774638	NUP98	0	0	0	7.03422	4.409	0.360117	hsa_circ_0000274	http://www.circbase.org/cgi-bin/singlerecord.cgi?id=hsa_circ_0000274
hsa_circ:chr11:3756421-3774638	NUP98	0	15.9619	0	17.5856	0.136263	0.976311	hsa_circ_0008451	http://www.circbase.org/cgi-bin/singlerecord.cgi?id=hsa_circ_0008451
hsa_circ:chr11:3765739-3774638	NUP98	10.0918	0	0	0	-4.682	0.329779	hsa_circ_0005201	http://www.circbase.org/cgi-bin/singlerecord.cgi?id=hsa_circ_0005201
hsa_circ:chr11:3794862-3797251	NUP98	4.03674	11.9714	3.87984	0	-2.03212	0.522662	hsa_circ_0004960	http://www.circbase.org/cgi-bin/singlerecord.cgi?id=hsa_circ_0004960
hsa_circ:chr11:4076756-4095909	STIM1	0	0	14.5494	0	5.46349	0.255095	hsa_circ_0020936	http://www.circbase.org/cgi-bin/singlerecord.cgi?id=hsa_circ_0020936
hsa_circ:chr11:4123223-4127453	RRM1	0	0	13.5794	0	5.36411	0.261852	hsa_circ_0007414	http://www.circbase.org/cgi-bin/singlerecord.cgi?id=hsa_circ_0007414
hsa_circ:chr11:4123223-4133292	RRM1	2.01837	0	0	0	-2.34908	0.630393	hsa_circ_0007923	http://www.circbase.org/cgi-bin/singlerecord.cgi?id=hsa_circ_0007923
hsa_circ:chr11:44129233-44135851	EXT2	12.1102	0	11.6395	0	-0.0522248	0.990941	hsa_circ_0009018	http://www.circbase.org/cgi-bin/singlerecord.cgi?id=hsa_circ_0009018
hsa_circ:chr11:44129233-44151688	EXT2	0	0	0	12.8961	5.28526	0.271134	hsa_circ_0008830	http://www.circbase.org/cgi-bin/singlerecord.cgi?id=hsa_circ_0008830
hsa_circ:chr11:45880282-45882583	CRY2	0	4.78856	0	15.2408	1.66208	0.715904	hsa_circ_0021806	http://www.circbase.org/cgi-bin/singlerecord.cgi?id=hsa_circ_0021806
hsa_circ:chr11:45883611-45893784	CRY2	16.147	19.1543	49.4679	10.5513	0.770127	0.474061	hsa_circ_0000295	http://www.circbase.org/cgi-bin/singlerecord.cgi?id=hsa_circ_0000295
hsa_circ:chr11:46455024-46456587	AMBRA1	16.147	12.7695	10.6695	23.4474	0.236278	0.859361	hsa_circ_0021843	http://www.circbase.org/cgi-bin/singlerecord.cgi?id=hsa_circ_0021843
hsa_circ:chr11:46515158-46529920	AMBRA1	71.6521	69.4342	93.1161	51.5843	0.040919	0.938931	hsa_circ_0007001	http://www.circbase.org/cgi-bin/singlerecord.cgi?id=hsa_circ_0007001
hsa_circ:chr11:46515158-46534363	AMBRA1	43.3949	51.078	52.3778	0	-0.849382	0.75076	hsa_circ_0007061	http://www.circbase.org/cgi-bin/singlerecord.cgi?id=hsa_circ_0007061
hsa_circ:chr11:46515158-46567326	AMBRA1	0	1.59619	0	0	-2.0415	0.676651	hsa_circ_0021854	http://www.circbase.org/cgi-bin/singlerecord.cgi?id=hsa_circ_0021854
hsa_circ:chr11:46529741-46534363	AMBRA1	0	0	2.90988	0	3.1489	0.517345	hsa_circ_0003110	http://www.circbase.org/cgi-bin/singlerecord.cgi?id=hsa_circ_0003110
hsa_circ:chr11:46568663-46570050	AMBRA1	0	0	6.78971	0	4.36615	0.364903	hsa_circ_0004534	http://www.circbase.org/cgi-bin/singlerecord.cgi?id=hsa_circ_0004534
hsa_circ:chr11:46709723-46717706	ARHGAP1	0	8.77903	0	0	-4.48731	0.350567	NA	NA
hsa_circ:chr11:46804824-46810323	CKAP5	0	0	12.6095	0	5.25734	0.273709	NA	NA
hsa_circ:chr11:46810231-46818490	CKAP5	0	0	5.81975	0	4.14443	0.390315	NA	NA
hsa_circ:chr11:46811626-46812133	CKAP5	3.02755	0	7.75967	0	1.37209	0.75982	hsa_circ_0007985	http://www.circbase.org/cgi-bin/singlerecord.cgi?id=hsa_circ_0007985
hsa_circ:chr11:46822750-46831424	CKAP5	8.07348	0	0	0	-4.35935	0.364681	NA	NA
hsa_circ:chr11:46837749-46842819	CKAP5	0	0	4.84979	4.68948	4.8526	0.280654	hsa_circ_0021929	http://www.circbase.org/cgi-bin/singlerecord.cgi?id=hsa_circ_0021929
hsa_circ:chr11:46914524-46916842	LRP4	0	10.3752	0	0	-4.72779	0.325009	NA	NA
hsa_circ:chr11:46916140-46916842	LRP4	0	8.77903	0	0	-4.48731	0.350567	NA	NA
hsa_circ:chr11:47187819-47189802	ARFGAP2	9.08266	5.58666	0	0	-5.22392	0.204568	hsa_circ_0000298	http://www.circbase.org/cgi-bin/singlerecord.cgi?id=hsa_circ_0000298
hsa_circ:chr11:47317047-47317606	MADD	2.01837	19.9523	2.90988	0	-2.89739	0.322331	NA	NA
hsa_circ:chr11:47444125-47444524	PSMC3	60.5511	44.6933	52.3778	66.8251	0.180533	0.758329	hsa_circ_0006723	http://www.circbase.org/cgi-bin/singlerecord.cgi?id=hsa_circ_0006723
hsa_circ:chr11:47493743-47510576	CELF1	0	0	6.78971	0	4.36615	0.364903	hsa_circ_0003509	http://www.circbase.org/cgi-bin/singlerecord.cgi?id=hsa_circ_0003509
hsa_circ:chr11:47496888-47504408	CELF1	11.101	0	0	0	-4.81976	0.315569	NA	NA
hsa_circ:chr11:47504247-47510576	CELF1	0	3.19238	9.69959	0	1.59641	0.712999	hsa_circ_0000304	http://www.circbase.org/cgi-bin/singlerecord.cgi?id=hsa_circ_0000304
hsa_circ:chr11:47603640-47604020	NDUFS3	0	7.98094	0	16.4132	1.03475	0.822119	hsa_circ_0022015	http://www.circbase.org/cgi-bin/singlerecord.cgi?id=hsa_circ_0022015
hsa_circ:chr11:47647226-47648679	MTCH2	0	0	4.84979	0	3.88232	0.42174	hsa_circ_0022025	http://www.circbase.org/cgi-bin/singlerecord.cgi?id=hsa_circ_0022025
hsa_circ:chr11:47744528-47744868	FNBP4	0	5.58666	0	0	-3.83712	0.425951	hsa_circ_0008810	http://www.circbase.org/cgi-bin/singlerecord.cgi?id=hsa_circ_0008810
hsa_circ:chr11:47774468-47776216	FNBP4	0	24.7409	15.5193	21.1027	0.561272	0.82099	hsa_circ_0004075	http://www.circbase.org/cgi-bin/singlerecord.cgi?id=hsa_circ_0004075
hsa_circ:chr11:47804625-47808106	NUP160	0	0	5.81975	0	4.14443	0.390315	hsa_circ_0022058	http://www.circbase.org/cgi-bin/singlerecord.cgi?id=hsa_circ_0022058
hsa_circ:chr11:47837031-47841010	NUP160	9.08266	0	0	0	-4.52967	0.345973	NA	NA
hsa_circ:chr11:47857203-47862140	NUP160	0	7.18284	0	0	-4.19854	0.382922	NA	NA
hsa_circ:chr11:48161038-48161328	PTPRJ	0	9.57713	0	0	-4.61256	0.337098	hsa_circ_0022103	http://www.circbase.org/cgi-bin/singlerecord.cgi?id=hsa_circ_0022103
hsa_circ:chr11:498457-499999	RNH1	0	0	0	9.37896	4.82502	0.315758	NA	NA
hsa_circ:chr11:500484-502181	RNH1	0	4.78856	0	0	-3.61557	0.453691	NA	NA
hsa_circ:chr11:5624476-5624965	TRIM6,TRIM6-TRIM34	0	6.38475	3.87984	9.37896	1.04289	0.74458	hsa_circ_0002969	http://www.circbase.org/cgi-bin/singlerecord.cgi?id=hsa_circ_0002969
hsa_circ:chr11:57258697-57259335	SLC43A1	0	0	9.69959	0	4.8795	0.310232	hsa_circ_0005204	http://www.circbase.org/cgi-bin/singlerecord.cgi?id=hsa_circ_0005204
hsa_circ:chr11:57561482-57582972	CTNND1,TMX2-CTNND1	0	0	3.87984	0	3.56175	0.462171	NA	NA
hsa_circ:chr11:57563049-57564464	CTNND1,TMX2-CTNND1	2.01837	0	0	0	-2.34908	0.630393	NA	NA
hsa_circ:chr11:57569205-57569668	CTNND1,TMX2-CTNND1	0	0	0	3.51711	3.40518	0.482694	NA	NA
hsa_circ:chr11:57569205-57582972	CTNND1,TMX2-CTNND1	8.07348	0	0	0	-4.35935	0.364681	NA	NA
hsa_circ:chr11:57575862-57582972	CTNND1,TMX2-CTNND1	0	5.58666	0	0	-3.83712	0.425951	NA	NA
hsa_circ:chr11:581492-582081	PHRF1	3.02755	0	11.6395	8.20659	2.73619	0.356996	NA	NA
hsa_circ:chr11:581492-587464	PHRF1	26.2388	34.318	15.5193	32.8264	-0.33177	0.719504	hsa_circ_0020670	http://www.circbase.org/cgi-bin/singlerecord.cgi?id=hsa_circ_0020670
hsa_circ:chr11:581492-592674	PHRF1	0	0	9.69959	17.5856	6.36788	0.0375487	NA	NA
hsa_circ:chr11:587259-587464	PHRF1	3.02755	0	0	0	-2.93848	0.544567	NA	NA
hsa_circ:chr11:587259-601701	PHRF1	9.08266	0	0	0	-4.52967	0.345973	hsa_circ_0020671	http://www.circbase.org/cgi-bin/singlerecord.cgi?id=hsa_circ_0020671
hsa_circ:chr11:59406521-59406856	ENSG00000255139.1,PATL1	0	0	5.81975	0	4.14443	0.390315	NA	NA
hsa_circ:chr11:59406521-59410508	PATL1	3.02755	0	0	0	-2.93848	0.544567	hsa_circ_0004988	http://www.circbase.org/cgi-bin/singlerecord.cgi?id=hsa_circ_0004988
hsa_circ:chr11:59426339-59426942	PATL1	19.1745	32.7218	27.1588	16.4132	-0.252076	0.80042	hsa_circ_0004162	http://www.circbase.org/cgi-bin/singlerecord.cgi?id=hsa_circ_0004162
hsa_circ:chr11:596923-597570	PHRF1	9.08266	0	0	0	-4.52967	0.345973	NA	NA
hsa_circ:chr11:596923-598502	PHRF1	14.1286	0	0	0	-5.16819	0.275043	NA	NA
hsa_circ:chr11:60687158-60688460	TMEM109	10.0918	16.76	26.1889	15.2408	0.624455	0.618172	hsa_circ_0005701	http://www.circbase.org/cgi-bin/singlerecord.cgi?id=hsa_circ_0005701
hsa_circ:chr11:61091451-61094365	DDB1	0	7.98094	0	0	-4.35014	0.36571	NA	NA
hsa_circ:chr11:61094251-61097546	DDB1	11.101	0	9.69959	0	-0.189026	0.967262	hsa_circ_0003900	http://www.circbase.org/cgi-bin/singlerecord.cgi?id=hsa_circ_0003900
hsa_circ:chr11:61096835-61097546	DDB1	25.2296	12.7695	8.72963	0	-2.10362	0.284213	hsa_circ_0022308	http://www.circbase.org/cgi-bin/singlerecord.cgi?id=hsa_circ_0022308
hsa_circ:chr11:61133517-61135470	TMEM138	27.248	14.3657	14.5494	35.1711	0.25646	0.807685	hsa_circ_0002058	http://www.circbase.org/cgi-bin/singlerecord.cgi?id=hsa_circ_0002058
hsa_circ:chr11:61178410-61179409	CPSF7	0	7.18284	5.81975	0	-0.302784	0.944208	NA	NA
hsa_circ:chr11:61205097-61205585	SDHAF2	0	94.9732	95.056	29.3093	0.388558	0.896782	hsa_circ_0000311	http://www.circbase.org/cgi-bin/singlerecord.cgi?id=hsa_circ_0000311
hsa_circ:chr11:62303417-62304039	AHNAK	35.3215	48.6837	89.2362	80.8936	1.01483	0.0643972	hsa_circ_0008194	http://www.circbase.org/cgi-bin/singlerecord.cgi?id=hsa_circ_0008194
hsa_circ:chr11:62406455-62407203	GANAB	91.8358	92.5789	80.5066	82.0659	-0.182108	0.689076	hsa_circ_0008011	http://www.circbase.org/cgi-bin/singlerecord.cgi?id=hsa_circ_0008011
hsa_circ:chr11:6243672-6245937	FAM160A2	0	6.38475	0	0	-4.02912	0.402745	hsa_circ_0020990	http://www.circbase.org/cgi-bin/singlerecord.cgi?id=hsa_circ_0020990
hsa_circ:chr11:62488767-62491898	HNRNPUL2,HNRNPUL2-BSCL2	0	2.39428	0	0	-2.6212	0.590064	hsa_circ_0022513	http://www.circbase.org/cgi-bin/singlerecord.cgi?id=hsa_circ_0022513
hsa_circ:chr11:62491059-62491898	HNRNPUL2,HNRNPUL2-BSCL2	24.2204	0	0	0	-5.94671	0.2147	hsa_circ_0007866	http://www.circbase.org/cgi-bin/singlerecord.cgi?id=hsa_circ_0007866
hsa_circ:chr11:62549366-62550297	TAF6L	6.05511	21.5485	7.75967	0	-1.8199	0.442349	hsa_circ_0006855	http://www.circbase.org/cgi-bin/singlerecord.cgi?id=hsa_circ_0006855
hsa_circ:chr11:62591638-62595103	STX5	0	7.18284	0	0	-4.19854	0.382922	hsa_circ_0006748	http://www.circbase.org/cgi-bin/singlerecord.cgi?id=hsa_circ_0006748
hsa_circ:chr11:62606586-62607131	WDR74	6.05511	0	0	0	-3.94312	0.413042	hsa_circ_0022545	http://www.circbase.org/cgi-bin/singlerecord.cgi?id=hsa_circ_0022545
hsa_circ:chr11:62650380-62653080	SLC3A2	14.1286	13.5676	0	22.275	-0.31871	0.89649	hsa_circ_0022587	http://www.circbase.org/cgi-bin/singlerecord.cgi?id=hsa_circ_0022587
hsa_circ:chr11:63357572-63357840	PLA2G16	0	1.59619	6.78971	0	2.07529	0.651238	hsa_circ_0022594	http://www.circbase.org/cgi-bin/singlerecord.cgi?id=hsa_circ_0022594
hsa_circ:chr11:63357572-63365635	PLA2G16	0	0	0	12.8961	5.28526	0.271134	NA	NA
hsa_circ:chr11:63426233-63426724	ATL3	61.5603	21.5485	12.6095	19.9303	-1.35293	0.149551	hsa_circ_0022601	http://www.circbase.org/cgi-bin/singlerecord.cgi?id=hsa_circ_0022601
hsa_circ:chr11:63517463-63517670	RTN3	5.04592	6.38475	0	12.8961	0.16765	0.953979	hsa_circ_0022603	http://www.circbase.org/cgi-bin/singlerecord.cgi?id=hsa_circ_0022603
hsa_circ:chr11:63662631-63663105	MARK2	7.06429	11.9714	0	0	-5.60129	0.122745	hsa_circ_0022614	http://www.circbase.org/cgi-bin/singlerecord.cgi?id=hsa_circ_0022614
hsa_circ:chr11:63719710-63720311	NAA40	11.101	0	0	0	-4.81976	0.315569	hsa_circ_0022623	http://www.circbase.org/cgi-bin/singlerecord.cgi?id=hsa_circ_0022623
hsa_circ:chr11:63918711-63919865	MACROD1	0	0	0	5.86185	4.14518	0.390227	NA	NA
hsa_circ:chr11:63960550-63962092	STIP1	0	10.3752	2.90988	9.37896	0.234686	0.938005	hsa_circ_0022630	http://www.circbase.org/cgi-bin/singlerecord.cgi?id=hsa_circ_0022630
hsa_circ:chr11:63960550-63965446	STIP1	0	9.57713	0	0	-4.61256	0.337098	hsa_circ_0022631	http://www.circbase.org/cgi-bin/singlerecord.cgi?id=hsa_circ_0022631
hsa_circ:chr11:63961661-63965446	STIP1	5.04592	4.78856	0	0	-4.64763	0.299694	NA	NA
hsa_circ:chr11:64627396-64627808	EHD1	13.1194	35.1161	15.5193	0	-1.63004	0.481581	hsa_circ_0022723	http://www.circbase.org/cgi-bin/singlerecord.cgi?id=hsa_circ_0022723
hsa_circ:chr11:64846825-64847259	CDCA5	0	0	5.81975	0	4.14443	0.390315	NA	NA
hsa_circ:chr11:65161044-65161896	FRMD8	0	0	0	11.7237	5.14754	0.284	NA	NA
hsa_circ:chr11:65346549-65351236	EHBP1L1	0	7.18284	0	0	-4.19854	0.382922	NA	NA
hsa_circ:chr11:653962-688460	DEAF1	0	7.98094	0	0	-4.35014	0.36571	NA	NA
hsa_circ:chr11:65661485-65664477	FOSL1	54.496	25.539	15.5193	23.4474	-1.03845	0.243661	NA	NA
hsa_circ:chr11:65734942-65735292	SART1	4.03674	0	0	0	-3.35581	0.487497	NA	NA
hsa_circ:chr11:65977833-65978730	PACS1	16.147	5.58666	0	0	-5.79029	0.0905974	hsa_circ_0008248	http://www.circbase.org/cgi-bin/singlerecord.cgi?id=hsa_circ_0008248
hsa_circ:chr11:66006275-66006748	PACS1	15.1378	0	0	0	-5.26792	0.272203	hsa_circ_0006857	http://www.circbase.org/cgi-bin/singlerecord.cgi?id=hsa_circ_0006857
hsa_circ:chr11:66133407-66137003	SLC29A2	0	4.78856	8.72963	0	0.863017	0.840167	hsa_circ_0022983	http://www.circbase.org/cgi-bin/singlerecord.cgi?id=hsa_circ_0022983
hsa_circ:chr11:66254011-66255478	DPP3	28.2572	14.3657	11.6395	19.9303	-0.433094	0.71523	hsa_circ_0022989	http://www.circbase.org/cgi-bin/singlerecord.cgi?id=hsa_circ_0022989
hsa_circ:chr11:66407171-66407594	RBM4	7.06429	0	40.7383	0	2.53267	0.581691	hsa_circ_0000330	http://www.circbase.org/cgi-bin/singlerecord.cgi?id=hsa_circ_0000330
hsa_circ:chr11:66481102-66488733	SPTBN2	0	0	2.90988	0	3.1489	0.517345	NA	NA
hsa_circ:chr11:66515850-66526567	C11orf80	0	0	3.87984	0	3.56175	0.462171	NA	NA
hsa_circ:chr11:66563752-66583670	C11orf80	0	0	0	4.68948	3.8221	0.429169	NA	NA
hsa_circ:chr11:66571466-66590145	C11orf80	6.05511	0	0	0	-3.94312	0.413042	NA	NA
hsa_circ:chr11:66589114-66590145	C11orf80	13.1194	0	0	3.51711	-1.9051	0.672623	hsa_circ_0023033	http://www.circbase.org/cgi-bin/singlerecord.cgi?id=hsa_circ_0023033
hsa_circ:chr11:66589114-66595835	C11orf80	0	9.57713	11.6395	0	0.28073	0.951382	hsa_circ_0005611	http://www.circbase.org/cgi-bin/singlerecord.cgi?id=hsa_circ_0005611
hsa_circ:chr11:66974981-66986874	KDM2A	0	0	0	8.20659	4.63195	0.335868	NA	NA
hsa_circ:chr11:66995508-66999431	KDM2A	0	0	3.87984	0	3.56175	0.462171	NA	NA
hsa_circ:chr11:67058947-67059651	ANKRD13D	0	7.98094	0	0	-4.35014	0.36571	NA	NA
hsa_circ:chr11:67376023-67377106	NDUFV1	0	0	7.75967	0	4.55829	0.343757	NA	NA
hsa_circ:chr11:67376023-67378678	NDUFV1	0	0	4.84979	0	3.88232	0.42174	NA	NA
hsa_circ:chr11:67799619-67800750	NDUFS8	0	0	11.6395	0	5.14205	0.284521	NA	NA
hsa_circ:chr11:67837656-67864597	CHKA	0	7.18284	0	0	-4.19854	0.382922	NA	NA
hsa_circ:chr11:67953248-67957619	KMT5B	6.05511	3.99047	0	0	-4.67764	0.295931	NA	NA
hsa_circ:chr11:679688-681089	DEAF1	0	10.3752	0	0	-4.72779	0.325009	NA	NA
hsa_circ:chr11:68115315-68115711	LRP5	29.2664	25.539	35.8885	21.1027	0.0608713	0.94554	hsa_circ_0023179	http://www.circbase.org/cgi-bin/singlerecord.cgi?id=hsa_circ_0023179
hsa_circ:chr11:68115315-68125315	LRP5	23.2112	12.7695	11.6395	28.1369	0.143831	0.903271	hsa_circ_0023180	http://www.circbase.org/cgi-bin/singlerecord.cgi?id=hsa_circ_0023180
hsa_circ:chr11:68115315-68131411	LRP5	0	0	9.69959	0	4.8795	0.310232	hsa_circ_0023181	http://www.circbase.org/cgi-bin/singlerecord.cgi?id=hsa_circ_0023181
hsa_circ:chr11:68115315-68133170	LRP5	41.3766	39.9047	61.1074	52.7567	0.487691	0.434648	hsa_circ_0023182	http://www.circbase.org/cgi-bin/singlerecord.cgi?id=hsa_circ_0023182
hsa_circ:chr11:68115315-68157520	LRP5	11.101	13.5676	21.3391	12.8961	0.473756	0.733543	NA	NA
hsa_circ:chr11:68125118-68133170	LRP5	11.101	11.9714	7.75967	17.5856	0.131673	0.93577	hsa_circ_0023190	http://www.circbase.org/cgi-bin/singlerecord.cgi?id=hsa_circ_0023190
hsa_circ:chr11:68153784-68157520	LRP5	43.3949	21.5485	29.0988	31.654	-0.0921138	0.912865	NA	NA
hsa_circ:chr11:68183796-68193655	LRP5	0	4.78856	0	0	-3.61557	0.453691	hsa_circ_0023214	http://www.circbase.org/cgi-bin/singlerecord.cgi?id=hsa_circ_0023214
hsa_circ:chr11:68190957-68193655	LRP5	13.1194	8.77903	16.4893	0	-0.401082	0.859368	hsa_circ_0023216	http://www.circbase.org/cgi-bin/singlerecord.cgi?id=hsa_circ_0023216
hsa_circ:chr11:68272613-68305359	PPP6R3	0	12.7695	0	0	-5.02682	0.294991	hsa_circ_0004449	http://www.circbase.org/cgi-bin/singlerecord.cgi?id=hsa_circ_0004449
hsa_circ:chr11:68326034-68331900	PPP6R3	5.04592	0	0	0	-3.67914	0.445627	NA	NA
hsa_circ:chr11:68334482-68343511	PPP6R3	7.06429	0	0	0	-4.16619	0.386659	hsa_circ_0002038	http://www.circbase.org/cgi-bin/singlerecord.cgi?id=hsa_circ_0002038
hsa_circ:chr11:68334482-68363686	PPP6R3	13.1194	0	0	0	-5.06117	0.291667	NA	NA
hsa_circ:chr11:68337216-68343511	PPP6R3	0	0	0	14.0684	5.41091	0.253109	hsa_circ_0023233	http://www.circbase.org/cgi-bin/singlerecord.cgi?id=hsa_circ_0023233
hsa_circ:chr11:68350511-68363686	PPP6R3	5.04592	0	0	0	-3.67914	0.445627	NA	NA
hsa_circ:chr11:68367809-68370960	PPP6R3	0	3.99047	0	0	-3.3537	0.487777	hsa_circ_0007464	http://www.circbase.org/cgi-bin/singlerecord.cgi?id=hsa_circ_0007464
hsa_circ:chr11:68369331-68370960	PPP6R3	31.2847	15.9619	27.1588	0	-0.794479	0.749342	hsa_circ_0002417	http://www.circbase.org/cgi-bin/singlerecord.cgi?id=hsa_circ_0002417
hsa_circ:chr11:68527037-68529155	CPT1A	7.06429	0	11.6395	0	0.727096	0.874731	hsa_circ_0023249	http://www.circbase.org/cgi-bin/singlerecord.cgi?id=hsa_circ_0023249
hsa_circ:chr11:68529003-68530229	CPT1A	0	0	6.78971	0	4.36615	0.364903	hsa_circ_0023256	http://www.circbase.org/cgi-bin/singlerecord.cgi?id=hsa_circ_0023256
hsa_circ:chr11:68552283-68564401	CPT1A	0	0	4.84979	0	3.88232	0.42174	hsa_circ_0023265	http://www.circbase.org/cgi-bin/singlerecord.cgi?id=hsa_circ_0023265
hsa_circ:chr11:68571468-68575106	CPT1A	41.3766	27.9333	54.3177	31.654	0.317402	0.668963	hsa_circ_0023276	http://www.circbase.org/cgi-bin/singlerecord.cgi?id=hsa_circ_0023276
hsa_circ:chr11:68571468-68580044	CPT1A	0	0	7.75967	0	4.55829	0.343757	hsa_circ_0005282	http://www.circbase.org/cgi-bin/singlerecord.cgi?id=hsa_circ_0005282
hsa_circ:chr11:70189775-70194526	PPFIA1	0	7.98094	0	0	-4.35014	0.36571	hsa_circ_0023325	http://www.circbase.org/cgi-bin/singlerecord.cgi?id=hsa_circ_0023325
hsa_circ:chr11:70200407-70202360	PPFIA1	49.4501	113.329	89.2362	87.9278	0.117643	0.838098	hsa_circ_0000337	http://www.circbase.org/cgi-bin/singlerecord.cgi?id=hsa_circ_0000337
hsa_circ:chr11:70251371-70253697	CTTN	9.08266	31.1257	0	15.2408	-1.40758	0.565512	hsa_circ_0003376	http://www.circbase.org/cgi-bin/singlerecord.cgi?id=hsa_circ_0003376
hsa_circ:chr11:70251371-70260758	CTTN	5.04592	0	0	0	-3.67914	0.445627	hsa_circ_0007546	http://www.circbase.org/cgi-bin/singlerecord.cgi?id=hsa_circ_0007546
hsa_circ:chr11:70505933-70507783	SHANK2	0	0	8.72963	17.5856	6.31553	0.0428697	NA	NA
hsa_circ:chr11:70644548-70653276	SHANK2	0	6.38475	0	0	-4.02912	0.402745	NA	NA
hsa_circ:chr11:70644548-70666787	SHANK2	0	4.78856	0	0	-3.61557	0.453691	NA	NA
hsa_circ:chr11:71693807-71701763	RNF121	0	0	3.87984	0	3.56175	0.462171	hsa_circ_0023409	http://www.circbase.org/cgi-bin/singlerecord.cgi?id=hsa_circ_0023409
hsa_circ:chr11:721285-721691	EPS8L2	7.06429	0	0	0	-4.16619	0.386659	NA	NA
hsa_circ:chr11:72420915-72422544	ARAP1	0	13.5676	0	0	-5.11415	0.285394	hsa_circ_0003557	http://www.circbase.org/cgi-bin/singlerecord.cgi?id=hsa_circ_0003557
hsa_circ:chr11:72420915-72425366	ARAP1	0	0	4.84979	0	3.88232	0.42174	hsa_circ_0007722	http://www.circbase.org/cgi-bin/singlerecord.cgi?id=hsa_circ_0007722
hsa_circ:chr11:72423241-72424288	ARAP1	9.08266	0	8.72963	0	-0.050601	0.991236	hsa_circ_0023467	http://www.circbase.org/cgi-bin/singlerecord.cgi?id=hsa_circ_0023467
hsa_circ:chr11:72598515-72600990	FCHSD2	0	0	5.81975	0	4.14443	0.390315	hsa_circ_0007195	http://www.circbase.org/cgi-bin/singlerecord.cgi?id=hsa_circ_0007195
hsa_circ:chr11:72695133-72700142	FCHSD2	0	0	0	11.7237	5.14754	0.284	hsa_circ_0005918	http://www.circbase.org/cgi-bin/singlerecord.cgi?id=hsa_circ_0005918
hsa_circ:chr11:73418465-73429763	RAB6A	53.4868	34.318	0	24.6198	-1.83815	0.460407	hsa_circ_0000339	http://www.circbase.org/cgi-bin/singlerecord.cgi?id=hsa_circ_0000339
hsa_circ:chr11:73418465-73429935	RAB6A	13.1194	12.7695	31.0387	9.37896	0.647543	0.621904	hsa_circ_0004596	http://www.circbase.org/cgi-bin/singlerecord.cgi?id=hsa_circ_0004596
hsa_circ:chr11:73418465-73431944	RAB6A	42.3858	0	0	30.4816	-0.47582	0.917165	hsa_circ_0003908	http://www.circbase.org/cgi-bin/singlerecord.cgi?id=hsa_circ_0003908
hsa_circ:chr11:73620444-73627705	PAAF1	0	0	7.75967	0	4.55829	0.343757	NA	NA
hsa_circ:chr11:73789160-73789762	C2CD3	0	6.38475	4.84979	0	-0.395474	0.929189	hsa_circ_0001981	http://www.circbase.org/cgi-bin/singlerecord.cgi?id=hsa_circ_0001981
hsa_circ:chr11:73795926-73809300	C2CD3	0	0	8.72963	0	4.72782	0.325779	hsa_circ_0005914	http://www.circbase.org/cgi-bin/singlerecord.cgi?id=hsa_circ_0005914
hsa_circ:chr11:73829273-73834180	C2CD3	0	0	21.3391	0	6.01539	0.209715	hsa_circ_0023555	http://www.circbase.org/cgi-bin/singlerecord.cgi?id=hsa_circ_0023555
hsa_circ:chr11:73843889-73844602	C2CD3	0	23.1447	0	0	-5.88373	0.219631	hsa_circ_0023558	http://www.circbase.org/cgi-bin/singlerecord.cgi?id=hsa_circ_0023558
hsa_circ:chr11:74500671-74528759	RNF169	0	15.1638	8.72963	9.37896	0.249009	0.919439	hsa_circ_0006705	http://www.circbase.org/cgi-bin/singlerecord.cgi?id=hsa_circ_0006705
hsa_circ:chr11:74521229-74528759	RNF169	6.05511	0	0	8.20659	0.440348	0.916987	hsa_circ_0003206	http://www.circbase.org/cgi-bin/singlerecord.cgi?id=hsa_circ_0003206
hsa_circ:chr11:755879-760253	TALDO1	9.08266	17.5581	0	0	-6.08647	0.0493765	hsa_circ_0003307	http://www.circbase.org/cgi-bin/singlerecord.cgi?id=hsa_circ_0003307
hsa_circ:chr11:75590923-75623083	UVRAG	0	0	17.4593	10.5513	6.40736	0.0339392	hsa_circ_0023637	http://www.circbase.org/cgi-bin/singlerecord.cgi?id=hsa_circ_0023637
hsa_circ:chr11:75590923-75694557	UVRAG	0	0	0	7.03422	4.409	0.360117	NA	NA
hsa_circ:chr11:758950-760253	TALDO1	0	6.38475	0	0	-4.02912	0.402745	NA	NA
hsa_circ:chr11:7614363-7631653	PPFIBP2	0	0	4.84979	16.4132	6.00741	0.082949	hsa_circ_0006891	http://www.circbase.org/cgi-bin/singlerecord.cgi?id=hsa_circ_0006891
hsa_circ:chr11:76224430-76227356	EMSY	0	0	0	26.9645	6.35052	0.18522	hsa_circ_0023655	http://www.circbase.org/cgi-bin/singlerecord.cgi?id=hsa_circ_0023655
hsa_circ:chr11:77047131-77054976	PAK1	0	7.18284	0	0	-4.19854	0.382922	hsa_circ_0023676	http://www.circbase.org/cgi-bin/singlerecord.cgi?id=hsa_circ_0023676
hsa_circ:chr11:77085373-77103586	PAK1	0	7.98094	0	0	-4.35014	0.36571	hsa_circ_0023685	http://www.circbase.org/cgi-bin/singlerecord.cgi?id=hsa_circ_0023685
hsa_circ:chr11:77090286-77091039	PAK1	16.147	11.1733	23.279	50.4119	1.43245	0.144848	hsa_circ_0008992	http://www.circbase.org/cgi-bin/singlerecord.cgi?id=hsa_circ_0008992
hsa_circ:chr11:77330651-77336863	CLNS1A	24.2204	16.76	15.5193	0	-1.3925	0.529407	hsa_circ_0023694	http://www.circbase.org/cgi-bin/singlerecord.cgi?id=hsa_circ_0023694
hsa_circ:chr11:77330651-77340944	CLNS1A	12.1102	15.9619	10.6695	10.5513	-0.40482	0.799549	hsa_circ_0008342	http://www.circbase.org/cgi-bin/singlerecord.cgi?id=hsa_circ_0008342
hsa_circ:chr11:77336008-77336863	CLNS1A	47.4317	0	44.6181	43.3777	0.893353	0.746763	hsa_circ_0000343	http://www.circbase.org/cgi-bin/singlerecord.cgi?id=hsa_circ_0000343
hsa_circ:chr11:77336008-77340944	CLNS1A	15.1378	6.38475	34.9185	0	0.702422	0.788865	hsa_circ_0004593	http://www.circbase.org/cgi-bin/singlerecord.cgi?id=hsa_circ_0004593
hsa_circ:chr11:77394755-77404656	RSF1	38.349	25.539	36.8584	28.1369	0.0297047	0.970881	hsa_circ_0000344	http://www.circbase.org/cgi-bin/singlerecord.cgi?id=hsa_circ_0000344
hsa_circ:chr11:77451776-77458173	RSF1	9.08266	0	0	0	-4.52967	0.345973	NA	NA
hsa_circ:chr11:77666988-77672184	INTS4	0	0	0	7.03422	4.409	0.360117	hsa_circ_0023746	http://www.circbase.org/cgi-bin/singlerecord.cgi?id=hsa_circ_0023746
hsa_circ:chr11:78176922-78204241	NARS2	11.101	12.7695	8.72963	7.03422	-0.597984	0.750128	hsa_circ_0005935	http://www.circbase.org/cgi-bin/singlerecord.cgi?id=hsa_circ_0005935
hsa_circ:chr11:78180293-78204241	NARS2	0	15.1638	0	7.03422	-1.11414	0.809038	hsa_circ_0023812	http://www.circbase.org/cgi-bin/singlerecord.cgi?id=hsa_circ_0023812
hsa_circ:chr11:82935897-82947551	ANKRD42	0	3.19238	0	0	-3.03348	0.531288	NA	NA
hsa_circ:chr11:847201-850367	TSPAN4	0	0	11.6395	0	5.14205	0.284521	hsa_circ_0020728	http://www.circbase.org/cgi-bin/singlerecord.cgi?id=hsa_circ_0020728
hsa_circ:chr11:85373433-85374645	CREBZF	0	0	5.81975	0	4.14443	0.390315	hsa_circ_0023873	http://www.circbase.org/cgi-bin/singlerecord.cgi?id=hsa_circ_0023873
hsa_circ:chr11:85685751-85695016	PICALM	21.1929	8.77903	21.3391	0	-0.483861	0.842481	hsa_circ_0006629	http://www.circbase.org/cgi-bin/singlerecord.cgi?id=hsa_circ_0006629
hsa_circ:chr11:85692172-85693046	PICALM	5.04592	0	0	0	-3.67914	0.445627	hsa_circ_0023900	http://www.circbase.org/cgi-bin/singlerecord.cgi?id=hsa_circ_0023900
hsa_circ:chr11:85692788-85701442	PICALM	0	5.58666	0	0	-3.83712	0.425951	NA	NA
hsa_circ:chr11:85707869-85712201	PICALM	4.03674	0	0	0	-3.35581	0.487497	hsa_circ_0002513	http://www.circbase.org/cgi-bin/singlerecord.cgi?id=hsa_circ_0002513
hsa_circ:chr11:85707869-85714494	PICALM	25.2296	23.9428	32.0086	21.1027	0.114226	0.902796	hsa_circ_0023919	http://www.circbase.org/cgi-bin/singlerecord.cgi?id=hsa_circ_0023919
hsa_circ:chr11:85722073-85742653	PICALM	0	0	6.78971	16.4132	6.13373	0.0644303	hsa_circ_0000347	http://www.circbase.org/cgi-bin/singlerecord.cgi?id=hsa_circ_0000347
hsa_circ:chr11:85733410-85742653	PICALM	0	3.99047	11.6395	25.7922	3.19695	0.133044	hsa_circ_0023942	http://www.circbase.org/cgi-bin/singlerecord.cgi?id=hsa_circ_0023942
hsa_circ:chr11:85961338-85963282	EED	8.07348	0	0	3.51711	-1.2033	0.787287	hsa_circ_0008999	http://www.circbase.org/cgi-bin/singlerecord.cgi?id=hsa_circ_0008999
hsa_circ:chr11:85961338-85967554	EED	4.03674	0	5.81975	7.03422	1.68353	0.626477	hsa_circ_0007455	http://www.circbase.org/cgi-bin/singlerecord.cgi?id=hsa_circ_0007455
hsa_circ:chr11:86198379-86219909	ME3	0	12.7695	0	0	-5.02682	0.294991	hsa_circ_0023962	http://www.circbase.org/cgi-bin/singlerecord.cgi?id=hsa_circ_0023962
hsa_circ:chr11:86267595-86270865	ME3	40.3674	32.7218	20.3691	22.275	-0.77687	0.368047	hsa_circ_0023966	http://www.circbase.org/cgi-bin/singlerecord.cgi?id=hsa_circ_0023966
hsa_circ:chr11:86778736-86802437	TMEM135	0	20.7504	0	0	-5.72634	0.232309	hsa_circ_0008359	http://www.circbase.org/cgi-bin/singlerecord.cgi?id=hsa_circ_0008359
hsa_circ:chr11:9309249-9316934	TMEM41B	6.05511	13.5676	0	0	-5.64548	0.114933	hsa_circ_0021157	http://www.circbase.org/cgi-bin/singlerecord.cgi?id=hsa_circ_0021157
hsa_circ:chr11:93540684-93543042	MED17	0	3.19238	0	0	-3.03348	0.531288	NA	NA
hsa_circ:chr11:94163077-94180604	MRE11	0	1.59619	0	0	-2.0415	0.676651	hsa_circ_0024032	http://www.circbase.org/cgi-bin/singlerecord.cgi?id=hsa_circ_0024032
hsa_circ:chr11:94178976-94180604	MRE11	16.147	27.1352	0	35.1711	-0.302389	0.908629	hsa_circ_0024037	http://www.circbase.org/cgi-bin/singlerecord.cgi?id=hsa_circ_0024037
hsa_circ:chr11:9441958-9446809	IPO7	0	2.39428	0	4.68948	0.951511	0.836681	hsa_circ_0004672	http://www.circbase.org/cgi-bin/singlerecord.cgi?id=hsa_circ_0004672
hsa_circ:chr11:9450087-9452550	IPO7	0	12.7695	0	16.4132	0.35807	0.93786	hsa_circ_0007056	http://www.circbase.org/cgi-bin/singlerecord.cgi?id=hsa_circ_0007056
hsa_circ:chr11:9451221-9452550	IPO7	71.6521	55.0685	55.2877	25.7922	-0.636359	0.326025	hsa_circ_0005092	http://www.circbase.org/cgi-bin/singlerecord.cgi?id=hsa_circ_0005092
hsa_circ:chr11:9451221-9455393	IPO7	0	0	5.81975	0	4.14443	0.390315	hsa_circ_0003178	http://www.circbase.org/cgi-bin/singlerecord.cgi?id=hsa_circ_0003178
hsa_circ:chr11:94532556-94533477	AMOTL1	10.0918	0	12.6095	0	0.32658	0.943422	hsa_circ_0004214	http://www.circbase.org/cgi-bin/singlerecord.cgi?id=hsa_circ_0004214
hsa_circ:chr11:9462002-9463744	IPO7	19.1745	14.3657	0	12.8961	-1.38784	0.531095	hsa_circ_0004007	http://www.circbase.org/cgi-bin/singlerecord.cgi?id=hsa_circ_0004007
hsa_circ:chr11:95546096-95546753	CEP57	0	7.98094	0	0	-4.35014	0.36571	hsa_circ_0024067	http://www.circbase.org/cgi-bin/singlerecord.cgi?id=hsa_circ_0024067
hsa_circ:chr11:992503-994245	AP2A2	15.1378	0	0	0	-5.26792	0.272203	hsa_circ_0020748	http://www.circbase.org/cgi-bin/singlerecord.cgi?id=hsa_circ_0020748
hsa_circ:chr12:100676721-100691953	SCYL2	0	9.57713	8.72963	12.8961	1.16407	0.644418	hsa_circ_0006258	http://www.circbase.org/cgi-bin/singlerecord.cgi?id=hsa_circ_0006258
hsa_circ:chr12:101727079-101728282	UTP20	0	0	9.69959	11.7237	6.01953	0.0790043	NA	NA
hsa_circ:chr12:101750332-101750860	UTP20	0	0	0	9.37896	4.82502	0.315758	hsa_circ_0004627	http://www.circbase.org/cgi-bin/singlerecord.cgi?id=hsa_circ_0004627
hsa_circ:chr12:101760336-101761754	UTP20	10.0918	0	0	0	-4.682	0.329779	NA	NA
hsa_circ:chr12:101776819-101777447	UTP20	4.03674	0	0	0	-3.35581	0.487497	NA	NA
hsa_circ:chr12:101790177-101799759	ARL1	0	0	11.6395	0	5.14205	0.284521	hsa_circ_0027902	http://www.circbase.org/cgi-bin/singlerecord.cgi?id=hsa_circ_0027902
hsa_circ:chr12:102107868-102110590	CHPT1	10.0918	15.9619	16.4893	16.4132	0.333898	0.809739	hsa_circ_0006660	http://www.circbase.org/cgi-bin/singlerecord.cgi?id=hsa_circ_0006660
hsa_circ:chr12:102107868-102114032	CHPT1	6.05511	4.78856	0	0	-4.78826	0.280496	hsa_circ_0027904	http://www.circbase.org/cgi-bin/singlerecord.cgi?id=hsa_circ_0027904
hsa_circ:chr12:102301964-102308010	DRAM1	7.06429	0	0	3.51711	-1.01002	0.822815	hsa_circ_0000431	http://www.circbase.org/cgi-bin/singlerecord.cgi?id=hsa_circ_0000431
hsa_circ:chr12:10319311-10321774	OLR1	0	0	4.84979	0	3.88232	0.42174	NA	NA
hsa_circ:chr12:1034616-1042242	RAD52	0	0	0	8.20659	4.63195	0.335868	hsa_circ_0024990	http://www.circbase.org/cgi-bin/singlerecord.cgi?id=hsa_circ_0024990
hsa_circ:chr12:1038930-1039310	RAD52	0	2.39428	0	0	-2.6212	0.590064	hsa_circ_0024991	http://www.circbase.org/cgi-bin/singlerecord.cgi?id=hsa_circ_0024991
hsa_circ:chr12:104200100-104208899	NT5DC3	0	0	0	10.5513	4.99527	0.298708	NA	NA
hsa_circ:chr12:104514178-104517201	NFYB	6.05511	0	0	0	-3.94312	0.413042	NA	NA
hsa_circ:chr12:104705068-104721449	TXNRD1	0	3.99047	0	0	-3.3537	0.487777	hsa_circ_0005424	http://www.circbase.org/cgi-bin/singlerecord.cgi?id=hsa_circ_0005424
hsa_circ:chr12:104705068-104733051	TXNRD1	0	0	4.84979	0	3.88232	0.42174	hsa_circ_0027958	http://www.circbase.org/cgi-bin/singlerecord.cgi?id=hsa_circ_0027958
hsa_circ:chr12:105280071-105289123	SLC41A2	6.05511	0	0	0	-3.94312	0.413042	NA	NA
hsa_circ:chr12:105321751-105322472	SLC41A2	0	20.7504	0	0	-5.72634	0.232309	hsa_circ_0006260	http://www.circbase.org/cgi-bin/singlerecord.cgi?id=hsa_circ_0006260
hsa_circ:chr12:107236367-107237725	RIC8B	0	6.38475	17.4593	10.5513	2.11759	0.37276	hsa_circ_0002154	http://www.circbase.org/cgi-bin/singlerecord.cgi?id=hsa_circ_0002154
hsa_circ:chr12:108938915-108942990	SART3	18.1653	8.77903	11.6395	0	-1.19923	0.592787	NA	NA
hsa_circ:chr12:109046048-109048186	CORO1C	302.755	159.619	220.181	246.198	0.0141221	0.975459	hsa_circ_0000437	http://www.circbase.org/cgi-bin/singlerecord.cgi?id=hsa_circ_0000437
hsa_circ:chr12:109052514-109055934	CORO1C	29.2664	9.57713	8.72963	15.2408	-0.695479	0.612747	hsa_circ_0007007	http://www.circbase.org/cgi-bin/singlerecord.cgi?id=hsa_circ_0007007
hsa_circ:chr12:109072048-109095099	CORO1C	0	6.38475	0	0	-4.02912	0.402745	hsa_circ_0008081	http://www.circbase.org/cgi-bin/singlerecord.cgi?id=hsa_circ_0008081
hsa_circ:chr12:109094900-109095099	CORO1C	0	0	0	8.20659	4.63195	0.335868	hsa_circ_0007830	http://www.circbase.org/cgi-bin/singlerecord.cgi?id=hsa_circ_0007830
hsa_circ:chr12:109186062-109186605	SSH1	0	3.99047	0	0	-3.3537	0.487777	hsa_circ_0002957	http://www.circbase.org/cgi-bin/singlerecord.cgi?id=hsa_circ_0002957
hsa_circ:chr12:109210814-109217137	SSH1	0	7.98094	0	0	-4.35014	0.36571	hsa_circ_0028088	http://www.circbase.org/cgi-bin/singlerecord.cgi?id=hsa_circ_0028088
hsa_circ:chr12:109212025-109217137	SSH1	0	0	6.78971	0	4.36615	0.364903	hsa_circ_0028090	http://www.circbase.org/cgi-bin/singlerecord.cgi?id=hsa_circ_0028090
hsa_circ:chr12:110376185-110377052	GIT2	3.02755	0	0	0	-2.93848	0.544567	NA	NA
hsa_circ:chr12:110426768-110429565	GIT2	0	0	0	5.86185	4.14518	0.390227	hsa_circ_0028160	http://www.circbase.org/cgi-bin/singlerecord.cgi?id=hsa_circ_0028160
hsa_circ:chr12:110449810-110457133	ANKRD13A	0	0	0	5.86185	4.14518	0.390227	hsa_circ_0004009	http://www.circbase.org/cgi-bin/singlerecord.cgi?id=hsa_circ_0004009
hsa_circ:chr12:110456150-110463628	ANKRD13A	0	0	0	5.86185	4.14518	0.390227	hsa_circ_0008949	http://www.circbase.org/cgi-bin/singlerecord.cgi?id=hsa_circ_0008949
hsa_circ:chr12:110456150-110468563	ANKRD13A	8.07348	0	0	0	-4.35935	0.364681	NA	NA
hsa_circ:chr12:110463547-110467440	ANKRD13A	0	3.19238	0	0	-3.03348	0.531288	hsa_circ_0009075	http://www.circbase.org/cgi-bin/singlerecord.cgi?id=hsa_circ_0009075
hsa_circ:chr12:110471602-110474133	ANKRD13A	0	3.19238	0	0	-3.03348	0.531288	hsa_circ_0028167	http://www.circbase.org/cgi-bin/singlerecord.cgi?id=hsa_circ_0028167
hsa_circ:chr12:110729825-110734542	ATP2A2	12.1102	0	8.72963	19.9303	1.25181	0.56983	NA	NA
hsa_circ:chr12:110764195-110765822	ATP2A2	0	5.58666	0	0	-3.83712	0.425951	hsa_circ_0005279	http://www.circbase.org/cgi-bin/singlerecord.cgi?id=hsa_circ_0005279
hsa_circ:chr12:110778464-110780253	ATP2A2	28.2572	10.3752	20.3691	38.6882	0.616448	0.546818	hsa_circ_0002628	http://www.circbase.org/cgi-bin/singlerecord.cgi?id=hsa_circ_0002628
hsa_circ:chr12:110780033-110780253	ATP2A2	0	6.38475	0	0	-4.02912	0.402745	hsa_circ_0028177	http://www.circbase.org/cgi-bin/singlerecord.cgi?id=hsa_circ_0028177
hsa_circ:chr12:110819557-110820765	ANAPC7	0	7.98094	6.78971	0	-0.232658	0.955251	hsa_circ_0028185	http://www.circbase.org/cgi-bin/singlerecord.cgi?id=hsa_circ_0028185
hsa_circ:chr12:110819557-110834257	ANAPC7,ENSG00000258210.1	5.04592	7.18284	12.6095	0	0.0489716	0.986337	hsa_circ_0005785	http://www.circbase.org/cgi-bin/singlerecord.cgi?id=hsa_circ_0005785
hsa_circ:chr12:110826317-110834257	ANAPC7,ENSG00000258210.1	6.05511	0	0	0	-3.94312	0.413042	hsa_circ_0028196	http://www.circbase.org/cgi-bin/singlerecord.cgi?id=hsa_circ_0028196
hsa_circ:chr12:110832906-110834257	ANAPC7,ENSG00000258210.1	8.07348	0	0	0	-4.35935	0.364681	hsa_circ_0028198	http://www.circbase.org/cgi-bin/singlerecord.cgi?id=hsa_circ_0028198
hsa_circ:chr12:110893391-110895439	GPN3	4.03674	0	11.6395	11.7237	2.55389	0.344081	hsa_circ_0028202	http://www.circbase.org/cgi-bin/singlerecord.cgi?id=hsa_circ_0028202
hsa_circ:chr12:110983685-110989773	PPTC7	0	10.3752	0	8.20659	-0.34461	0.940431	NA	NA
hsa_circ:chr12:111159940-111160500	PPP1CC	0	8.77903	0	0	-4.48731	0.350567	NA	NA
hsa_circ:chr12:111168334-111169706	PPP1CC	14.1286	5.58666	0	0	-5.64984	0.114117	NA	NA
hsa_circ:chr12:111855923-111856681	SH2B3	0	0	0	15.2408	5.5266	0.249579	hsa_circ_0006741	http://www.circbase.org/cgi-bin/singlerecord.cgi?id=hsa_circ_0006741
hsa_circ:chr12:111907912-111908546	ATXN2	0	0	0	4.68948	3.8221	0.429169	hsa_circ_0028245	http://www.circbase.org/cgi-bin/singlerecord.cgi?id=hsa_circ_0028245
hsa_circ:chr12:111947353-111948386	ATXN2	0	0	3.87984	11.7237	5.5611	0.167273	hsa_circ_0002601	http://www.circbase.org/cgi-bin/singlerecord.cgi?id=hsa_circ_0002601
hsa_circ:chr12:111947353-111951343	ATXN2	0	7.98094	0	0	-4.35014	0.36571	hsa_circ_0003387	http://www.circbase.org/cgi-bin/singlerecord.cgi?id=hsa_circ_0003387
hsa_circ:chr12:111951161-111958777	ATXN2	0	0	0	7.03422	4.409	0.360117	NA	NA
hsa_circ:chr12:111962996-111990781	ATXN2	0	5.58666	0	0	-3.83712	0.425951	hsa_circ_0003197	http://www.circbase.org/cgi-bin/singlerecord.cgi?id=hsa_circ_0003197
hsa_circ:chr12:111990084-111990781	ATXN2	0	14.3657	19.3992	0	0.432787	0.924862	hsa_circ_0028270	http://www.circbase.org/cgi-bin/singlerecord.cgi?id=hsa_circ_0028270
hsa_circ:chr12:111990084-111993723	ATXN2	132.203	82.2037	91.1761	203.992	0.460946	0.47674	hsa_circ_0002457	http://www.circbase.org/cgi-bin/singlerecord.cgi?id=hsa_circ_0002457
hsa_circ:chr12:111991962-111993723	ATXN2	0	12.7695	0	0	-5.02682	0.294991	hsa_circ_0000439	http://www.circbase.org/cgi-bin/singlerecord.cgi?id=hsa_circ_0000439
hsa_circ:chr12:112087743-112098479	BRAP	0	0	10.6695	0	5.01674	0.296603	NA	NA
hsa_circ:chr12:112096540-112098479	BRAP	3.02755	0	10.6695	0	1.83171	0.668759	hsa_circ_0007776	http://www.circbase.org/cgi-bin/singlerecord.cgi?id=hsa_circ_0007776
hsa_circ:chr12:112096540-112117144	BRAP	0	0	6.78971	0	4.36615	0.364903	hsa_circ_0003884	http://www.circbase.org/cgi-bin/singlerecord.cgi?id=hsa_circ_0003884
hsa_circ:chr12:112229865-112230586	ALDH2	0	0	20.3691	0	5.94835	0.214889	NA	NA
hsa_circ:chr12:112303054-112308984	MAPKAPK5	0	0	13.5794	0	5.36411	0.261852	hsa_circ_0004466	http://www.circbase.org/cgi-bin/singlerecord.cgi?id=hsa_circ_0004466
hsa_circ:chr12:112305376-112308984	MAPKAPK5	0	0	9.69959	0	4.8795	0.310232	hsa_circ_0005985	http://www.circbase.org/cgi-bin/singlerecord.cgi?id=hsa_circ_0005985
hsa_circ:chr12:112321385-112321572	MAPKAPK5	6.05511	0	0	0	-3.94312	0.413042	hsa_circ_0002488	http://www.circbase.org/cgi-bin/singlerecord.cgi?id=hsa_circ_0002488
hsa_circ:chr12:112371690-112381173	TMEM116	0	13.5676	4.84979	3.51711	-0.701168	0.819349	hsa_circ_0004206	http://www.circbase.org/cgi-bin/singlerecord.cgi?id=hsa_circ_0004206
hsa_circ:chr12:112509699-112516545	NAA25	0	9.57713	0	0	-4.61256	0.337098	hsa_circ_0028334	http://www.circbase.org/cgi-bin/singlerecord.cgi?id=hsa_circ_0028334
hsa_circ:chr12:112513482-112516545	NAA25	28.2572	14.3657	16.4893	39.8606	0.403117	0.689095	NA	NA
hsa_circ:chr12:112528530-112530940	NAA25	0	0	7.75967	0	4.55829	0.343757	hsa_circ_0028342	http://www.circbase.org/cgi-bin/singlerecord.cgi?id=hsa_circ_0028342
hsa_circ:chr12:112641440-112642427	HECTD4	0	0	7.75967	9.37896	5.6976	0.136619	NA	NA
hsa_circ:chr12:112654096-112654999	HECTD4	12.1102	0	15.5193	0	0.362199	0.937169	hsa_circ_0028386	http://www.circbase.org/cgi-bin/singlerecord.cgi?id=hsa_circ_0028386
hsa_circ:chr12:112676856-112677831	HECTD4	0	0	0	14.0684	5.41091	0.253109	NA	NA
hsa_circ:chr12:112717032-112757546	HECTD4	4.03674	0	0	0	-3.35581	0.487497	NA	NA
hsa_circ:chr12:112752261-112757546	HECTD4	7.06429	0	0	0	-4.16619	0.386659	NA	NA
hsa_circ:chr12:112757029-112757546	HECTD4	16.147	0	31.0387	26.9645	1.85183	0.438169	hsa_circ_0002584	http://www.circbase.org/cgi-bin/singlerecord.cgi?id=hsa_circ_0002584
hsa_circ:chr12:112915455-112915819	PTPN11	0	0	8.72963	4.68948	5.34572	0.209408	hsa_circ_0008666	http://www.circbase.org/cgi-bin/singlerecord.cgi?id=hsa_circ_0008666
hsa_circ:chr12:112924279-112926979	PTPN11	4.03674	0	0	0	-3.35581	0.487497	NA	NA
hsa_circ:chr12:113541751-113542103	RASAL1	0	0	5.81975	0	4.14443	0.390315	NA	NA
hsa_circ:chr12:1136914-1137738	ERC1	43.3949	26.3371	21.3391	31.654	-0.395897	0.641226	hsa_circ_0000373	http://www.circbase.org/cgi-bin/singlerecord.cgi?id=hsa_circ_0000373
hsa_circ:chr12:113705648-113707650	TPCN1	15.1378	22.3466	32.0086	22.275	0.533061	0.59739	hsa_circ_0002857	http://www.circbase.org/cgi-bin/singlerecord.cgi?id=hsa_circ_0002857
hsa_circ:chr12:113742126-113745649	SLC8B1	0	7.98094	0	0	-4.35014	0.36571	NA	NA
hsa_circ:chr12:113758136-113759153	SLC8B1	7.06429	7.18284	0	0	-5.1825	0.213061	NA	NA
hsa_circ:chr12:114823281-114841741	TBX5	0	5.58666	11.6395	8.20659	1.81557	0.515933	hsa_circ_0003176	http://www.circbase.org/cgi-bin/singlerecord.cgi?id=hsa_circ_0003176
hsa_circ:chr12:116534474-116549317	MED13L	44.4041	0	28.1288	49.2396	0.80264	0.772152	hsa_circ_0000441	http://www.circbase.org/cgi-bin/singlerecord.cgi?id=hsa_circ_0000441
hsa_circ:chr12:117365828-117402659	FBXW8	15.1378	2.39428	5.81975	0	-1.57655	0.596139	hsa_circ_0003677	http://www.circbase.org/cgi-bin/singlerecord.cgi?id=hsa_circ_0003677
hsa_circ:chr12:117383169-117402659	FBXW8	10.0918	0	0	0	-4.682	0.329779	hsa_circ_0028608	http://www.circbase.org/cgi-bin/singlerecord.cgi?id=hsa_circ_0028608
hsa_circ:chr12:117402502-117426674	FBXW8	0	5.58666	0	0	-3.83712	0.425951	hsa_circ_0005916	http://www.circbase.org/cgi-bin/singlerecord.cgi?id=hsa_circ_0005916
hsa_circ:chr12:117423011-117426674	ENSG00000257279.1,FBXW8,LOC100506551	4.03674	0	14.5494	0	1.8594	0.680284	hsa_circ_0006150	http://www.circbase.org/cgi-bin/singlerecord.cgi?id=hsa_circ_0006150
hsa_circ:chr12:117484364-117486963	TESC	0	5.58666	0	0	-3.83712	0.425951	NA	NA
hsa_circ:chr12:117612010-117624376	FBXO21	0	5.58666	0	0	-3.83712	0.425951	NA	NA
hsa_circ:chr12:118455800-118463633	RFC5	0	4.78856	0	0	-3.61557	0.453691	NA	NA
hsa_circ:chr12:118474143-118476193	WSB2	6.05511	0	10.6695	0	0.825129	0.855718	hsa_circ_0007681	http://www.circbase.org/cgi-bin/singlerecord.cgi?id=hsa_circ_0007681
hsa_circ:chr12:118480646-118481182	WSB2	0	7.98094	0	5.86185	-0.45528	0.91484	hsa_circ_0028635	http://www.circbase.org/cgi-bin/singlerecord.cgi?id=hsa_circ_0028635
hsa_circ:chr12:118480646-118490283	WSB2	0	0	2.90988	0	3.1489	0.517345	NA	NA
hsa_circ:chr12:118511504-118511797	VSIG10	0	9.57713	0	0	-4.61256	0.337098	NA	NA
hsa_circ:chr12:118533338-118533619	VSIG10	12.1102	0	10.6695	0	-0.177535	0.969226	hsa_circ_0028644	http://www.circbase.org/cgi-bin/singlerecord.cgi?id=hsa_circ_0028644
hsa_circ:chr12:118682699-118693460	TAOK3	0	0	5.81975	3.51711	4.82246	0.28494	hsa_circ_0028671	http://www.circbase.org/cgi-bin/singlerecord.cgi?id=hsa_circ_0028671
hsa_circ:chr12:1192330-1192746	ERC1	0	5.58666	0	0	-3.83712	0.425951	NA	NA
hsa_circ:chr12:120195175-120196504	CIT	3.02755	0	0	0	-2.93848	0.544567	NA	NA
hsa_circ:chr12:12022358-12022903	ETV6	0	0	17.4593	0	5.72619	0.232696	hsa_circ_0004123	http://www.circbase.org/cgi-bin/singlerecord.cgi?id=hsa_circ_0004123
hsa_circ:chr12:120241010-120288079	CIT	0	3.99047	0	0	-3.3537	0.487777	hsa_circ_0028702	http://www.circbase.org/cgi-bin/singlerecord.cgi?id=hsa_circ_0028702
hsa_circ:chr12:120260624-120263172	CIT	0	0	10.6695	0	5.01674	0.296603	hsa_circ_0028704	http://www.circbase.org/cgi-bin/singlerecord.cgi?id=hsa_circ_0028704
hsa_circ:chr12:120436325-120436540	BICDL1	0	6.38475	0	0	-4.02912	0.402745	NA	NA
hsa_circ:chr12:120580311-120580745	GCN1	8.07348	14.3657	0	0	-5.8387	0.0820804	NA	NA
hsa_circ:chr12:120588949-120589195	GCN1	0	0	18.4292	22.275	6.94551	0.00556781	NA	NA
hsa_circ:chr12:120592774-120593523	GCN1	537.895	571.435	502.439	481.844	-0.172625	0.470708	hsa_circ_0000448	http://www.circbase.org/cgi-bin/singlerecord.cgi?id=hsa_circ_0000448
hsa_circ:chr12:120611457-120611973	GCN1	0	0	15.5193	0	5.55647	0.246999	hsa_circ_0005005	http://www.circbase.org/cgi-bin/singlerecord.cgi?id=hsa_circ_0005005
hsa_circ:chr12:120995085-120995485	RNF10	0	33.5199	31.0387	5.86185	0.137665	0.960877	hsa_circ_0028899	http://www.circbase.org/cgi-bin/singlerecord.cgi?id=hsa_circ_0028899
hsa_circ:chr12:120995085-120998689	RNF10	0	0	1.93992	7.03422	4.76238	0.294637	hsa_circ_0008803	http://www.circbase.org/cgi-bin/singlerecord.cgi?id=hsa_circ_0008803
hsa_circ:chr12:121000748-121001746	RNF10	0	11.1733	0	0	-4.8345	0.314073	hsa_circ_0006390	http://www.circbase.org/cgi-bin/singlerecord.cgi?id=hsa_circ_0006390
hsa_circ:chr12:121002875-121004783	RNF10	10.0918	16.76	0	0	-6.09764	0.0478354	hsa_circ_0005086	http://www.circbase.org/cgi-bin/singlerecord.cgi?id=hsa_circ_0005086
hsa_circ:chr12:121154431-121154845	UNC119B	0	0	10.6695	0	5.01674	0.296603	NA	NA
hsa_circ:chr12:121220458-121222396	SPPL3	25.2296	15.9619	9.69959	0	-2.06816	0.263226	hsa_circ_0003472	http://www.circbase.org/cgi-bin/singlerecord.cgi?id=hsa_circ_0003472
hsa_circ:chr12:121706441-121712388	CAMKK2	7.06429	0	0	0	-4.16619	0.386659	hsa_circ_0028959	http://www.circbase.org/cgi-bin/singlerecord.cgi?id=hsa_circ_0028959
hsa_circ:chr12:121773336-121775195	ANAPC5	0	0	10.6695	0	5.01674	0.296603	hsa_circ_0028976	http://www.circbase.org/cgi-bin/singlerecord.cgi?id=hsa_circ_0028976
hsa_circ:chr12:121853962-121855714	RNF34	0	3.99047	0	11.7237	1.54211	0.703243	hsa_circ_0004513	http://www.circbase.org/cgi-bin/singlerecord.cgi?id=hsa_circ_0004513
hsa_circ:chr12:1219358-1225199	ERC1	0	0	0	8.20659	4.63195	0.335868	NA	NA
hsa_circ:chr12:122181535-122190129	TMEM120B	16.147	15.1638	9.69959	0	-1.67743	0.432219	hsa_circ_0006030	http://www.circbase.org/cgi-bin/singlerecord.cgi?id=hsa_circ_0006030
hsa_circ:chr12:122181535-122199644	TMEM120B	0	19.1543	0	5.86185	-1.71457	0.71021	hsa_circ_0029000	http://www.circbase.org/cgi-bin/singlerecord.cgi?id=hsa_circ_0029000
hsa_circ:chr12:122218778-122219098	RHOF,TMEM120B	0	8.77903	0	0	-4.48731	0.350567	hsa_circ_0000450	http://www.circbase.org/cgi-bin/singlerecord.cgi?id=hsa_circ_0000450
hsa_circ:chr12:122257310-122257801	SETD1B	12.1102	7.98094	5.81975	0	-1.77363	0.521184	NA	NA
hsa_circ:chr12:122332645-122341013	PSMD9	0	8.77903	12.6095	0	0.52127	0.909868	hsa_circ_0008670	http://www.circbase.org/cgi-bin/singlerecord.cgi?id=hsa_circ_0008670
hsa_circ:chr12:122380440-122386967	WDR66	0	0	3.87984	0	3.56175	0.462171	hsa_circ_0003414	http://www.circbase.org/cgi-bin/singlerecord.cgi?id=hsa_circ_0003414
hsa_circ:chr12:122468606-122481959	BCL7A	0	11.1733	15.5193	10.5513	1.2127	0.596488	hsa_circ_0000452	http://www.circbase.org/cgi-bin/singlerecord.cgi?id=hsa_circ_0000452
hsa_circ:chr12:122734418-122735646	VPS33A	0	0	0	7.03422	4.409	0.360117	NA	NA
hsa_circ:chr12:122825300-122826244	CLIP1	0	0	13.5794	9.37896	6.12018	0.0653907	hsa_circ_0029069	http://www.circbase.org/cgi-bin/singlerecord.cgi?id=hsa_circ_0029069
hsa_circ:chr12:122837273-122845728	CLIP1	0	4.78856	0	0	-3.61557	0.453691	hsa_circ_0029070	http://www.circbase.org/cgi-bin/singlerecord.cgi?id=hsa_circ_0029070
hsa_circ:chr12:122861936-122865105	CLIP1	6.05511	12.7695	22.3091	9.37896	0.749798	0.640652	hsa_circ_0005465	http://www.circbase.org/cgi-bin/singlerecord.cgi?id=hsa_circ_0005465
hsa_circ:chr12:12300300-12303972	LRP6	0	0	4.84979	0	3.88232	0.42174	hsa_circ_0025479	http://www.circbase.org/cgi-bin/singlerecord.cgi?id=hsa_circ_0025479
hsa_circ:chr12:123028706-123034411	KNTC1	0	4.78856	0	0	-3.61557	0.453691	NA	NA
hsa_circ:chr12:123030723-123032516	KNTC1	0	0	19.3992	0	5.87803	0.220414	hsa_circ_0029098	http://www.circbase.org/cgi-bin/singlerecord.cgi?id=hsa_circ_0029098
hsa_circ:chr12:123062219-123065217	KNTC1	0	4.78856	0	0	-3.61557	0.453691	hsa_circ_0004265	http://www.circbase.org/cgi-bin/singlerecord.cgi?id=hsa_circ_0004265
hsa_circ:chr12:123062219-123067532	KNTC1	10.0918	0	0	0	-4.682	0.329779	NA	NA
hsa_circ:chr12:123068825-123069537	KNTC1	14.1286	0	12.6095	17.5856	1.10314	0.639857	NA	NA
hsa_circ:chr12:123068825-123073363	KNTC1	0	0	0	14.0684	5.41091	0.253109	NA	NA
hsa_circ:chr12:123072258-123073363	KNTC1	0	0	0	7.03422	4.409	0.360117	NA	NA
hsa_circ:chr12:12311763-12318229	LRP6	0	8.77903	0	0	-4.48731	0.350567	hsa_circ_0025483	http://www.circbase.org/cgi-bin/singlerecord.cgi?id=hsa_circ_0025483
hsa_circ:chr12:123262038-123265877	CCDC62	0	0	7.75967	0	4.55829	0.343757	hsa_circ_0007708	http://www.circbase.org/cgi-bin/singlerecord.cgi?id=hsa_circ_0007708
hsa_circ:chr12:12332744-12340053	LRP6	0	14.3657	0	0	-5.19648	0.278824	hsa_circ_0008932	http://www.circbase.org/cgi-bin/singlerecord.cgi?id=hsa_circ_0008932
hsa_circ:chr12:12339857-12356334	LRP6	0	0	0	2.34474	2.81658	0.564129	hsa_circ_0025491	http://www.circbase.org/cgi-bin/singlerecord.cgi?id=hsa_circ_0025491
hsa_circ:chr12:123416739-123419978	ABCB9	0	0	14.5494	4.68948	5.86608	0.106201	hsa_circ_0009115	http://www.circbase.org/cgi-bin/singlerecord.cgi?id=hsa_circ_0009115
hsa_circ:chr12:123488941-123490095	PITPNM2	22.2021	0	1.93992	0	-3.50026	0.432331	hsa_circ_0029168	http://www.circbase.org/cgi-bin/singlerecord.cgi?id=hsa_circ_0029168
hsa_circ:chr12:123497160-123498589	PITPNM2	0	0	7.75967	0	4.55829	0.343757	hsa_circ_0029170	http://www.circbase.org/cgi-bin/singlerecord.cgi?id=hsa_circ_0029170
hsa_circ:chr12:123798167-123800207	SBNO1	7.06429	4.78856	7.75967	0	-0.602595	0.850276	hsa_circ_0005310	http://www.circbase.org/cgi-bin/singlerecord.cgi?id=hsa_circ_0005310
hsa_circ:chr12:123818600-123825635	SBNO1	13.1194	0	0	0	-5.06117	0.291667	hsa_circ_0029221	http://www.circbase.org/cgi-bin/singlerecord.cgi?id=hsa_circ_0029221
hsa_circ:chr12:123825535-123830117	SBNO1	0	0	9.69959	0	4.8795	0.310232	NA	NA
hsa_circ:chr12:123829805-123834988	SBNO1	0	0	0	19.9303	5.91406	0.21757	hsa_circ_0002510	http://www.circbase.org/cgi-bin/singlerecord.cgi?id=hsa_circ_0002510
hsa_circ:chr12:123832576-123834988	SBNO1	2.01837	0	0	0	-2.34908	0.630393	hsa_circ_0029222	http://www.circbase.org/cgi-bin/singlerecord.cgi?id=hsa_circ_0029222
hsa_circ:chr12:123907591-123915206	RILPL2	0	1.59619	0	0	-2.0415	0.676651	NA	NA
hsa_circ:chr12:12397196-12397589	LRP6	192.754	177.975	151.314	169.994	-0.206755	0.53898	hsa_circ_0000378	http://www.circbase.org/cgi-bin/singlerecord.cgi?id=hsa_circ_0000378
hsa_circ:chr12:123983091-123984083	RILPL1	38.349	16.76	23.279	26.9645	-0.129214	0.891414	hsa_circ_0007552	http://www.circbase.org/cgi-bin/singlerecord.cgi?id=hsa_circ_0007552
hsa_circ:chr12:123983091-124003041	RILPL1	0	0	5.81975	0	4.14443	0.390315	NA	NA
hsa_circ:chr12:124071294-124074996	TMED2	9.08266	31.9238	47.528	31.654	0.941366	0.307899	hsa_circ_0000458	http://www.circbase.org/cgi-bin/singlerecord.cgi?id=hsa_circ_0000458
hsa_circ:chr12:124101058-124102419	DDX55	0	0	0	4.68948	3.8221	0.429169	hsa_circ_0008565	http://www.circbase.org/cgi-bin/singlerecord.cgi?id=hsa_circ_0008565
hsa_circ:chr12:124101058-124103384	DDX55	0	1.59619	0	8.20659	2.34034	0.607344	hsa_circ_0029241	http://www.circbase.org/cgi-bin/singlerecord.cgi?id=hsa_circ_0029241
hsa_circ:chr12:124102305-124103384	DDX55	25.2296	11.1733	10.6695	0	-1.75479	0.372594	hsa_circ_0029243	http://www.circbase.org/cgi-bin/singlerecord.cgi?id=hsa_circ_0029243
hsa_circ:chr12:124163736-124171582	TCTN2	0	0	14.5494	0	5.46349	0.255095	hsa_circ_0029268	http://www.circbase.org/cgi-bin/singlerecord.cgi?id=hsa_circ_0029268
hsa_circ:chr12:124235657-124236949	ATP6V0A2	0	5.58666	0	0	-3.83712	0.425951	NA	NA
hsa_circ:chr12:124824552-124826620	NCOR2	7.06429	0	0	0	-4.16619	0.386659	NA	NA
hsa_circ:chr12:124832371-124835283	NCOR2	0	0	5.81975	0	4.14443	0.390315	hsa_circ_0029301	http://www.circbase.org/cgi-bin/singlerecord.cgi?id=hsa_circ_0029301
hsa_circ:chr12:124856568-124862930	NCOR2	0	6.38475	0	26.9645	2.07264	0.652517	hsa_circ_0002783	http://www.circbase.org/cgi-bin/singlerecord.cgi?id=hsa_circ_0002783
hsa_circ:chr12:124904503-124915333	NCOR2	19.1745	20.7504	15.5193	30.4816	0.199985	0.850376	hsa_circ_0029308	http://www.circbase.org/cgi-bin/singlerecord.cgi?id=hsa_circ_0029308
hsa_circ:chr12:124911168-124915333	NCOR2	4.03674	0	0	0	-3.35581	0.487497	NA	NA
hsa_circ:chr12:124941652-124971114	NCOR2	0	14.3657	0	0	-5.19648	0.278824	NA	NA
hsa_circ:chr12:124950719-124957677	NCOR2	0	10.3752	0	5.86185	-0.831797	0.853432	NA	NA
hsa_circ:chr12:124968142-124979914	NCOR2	0	3.99047	0	0	-3.3537	0.487777	NA	NA
hsa_circ:chr12:125270903-125284788	SCARB1	7.06429	0	0	0	-4.16619	0.386659	hsa_circ_0029325	http://www.circbase.org/cgi-bin/singlerecord.cgi?id=hsa_circ_0029325
hsa_circ:chr12:125436944-125438757	DHX37	36.3306	47.0875	25.2189	55.1014	-0.0616222	0.93313	NA	NA
hsa_circ:chr12:125448940-125450358	DHX37	8.07348	0	0	12.8961	0.677148	0.883131	hsa_circ_0004847	http://www.circbase.org/cgi-bin/singlerecord.cgi?id=hsa_circ_0004847
hsa_circ:chr12:125587225-125591814	AACS	8.07348	15.9619	25.2189	11.7237	0.618832	0.654825	hsa_circ_0006078	http://www.circbase.org/cgi-bin/singlerecord.cgi?id=hsa_circ_0006078
hsa_circ:chr12:12672796-12674397	DUSP16	15.1378	12.7695	0	0	-6.15221	0.0415748	hsa_circ_0003855	http://www.circbase.org/cgi-bin/singlerecord.cgi?id=hsa_circ_0003855
hsa_circ:chr12:12788711-12788908	CREBL2	9.08266	0	13.5794	0	0.585657	0.898747	hsa_circ_0002873	http://www.circbase.org/cgi-bin/singlerecord.cgi?id=hsa_circ_0002873
hsa_circ:chr12:1289706-1299218	ERC1	0	0	24.249	0	6.19965	0.195968	NA	NA
hsa_circ:chr12:129285399-129299615	SLC15A4	0	11.9714	0	0	-4.93386	0.304114	hsa_circ_0029394	http://www.circbase.org/cgi-bin/singlerecord.cgi?id=hsa_circ_0029394
hsa_circ:chr12:129293333-129299615	SLC15A4	0	2.39428	0	0	-2.6212	0.590064	hsa_circ_0006689	http://www.circbase.org/cgi-bin/singlerecord.cgi?id=hsa_circ_0006689
hsa_circ:chr12:129299320-129299615	SLC15A4	39.3582	56.6647	38.7984	53.929	-0.0556869	0.931996	hsa_circ_0000462	http://www.circbase.org/cgi-bin/singlerecord.cgi?id=hsa_circ_0000462
hsa_circ:chr12:132237668-132241189	SFSWAP	0	18.3562	0	7.03422	-1.38942	0.763009	hsa_circ_0005186	http://www.circbase.org/cgi-bin/singlerecord.cgi?id=hsa_circ_0005186
hsa_circ:chr12:132466034-132479501	EP400	0	3.99047	0	0	-3.3537	0.487777	NA	NA
hsa_circ:chr12:133245397-133248908	POLE	4.03674	0	0	8.20659	1.02778	0.815656	hsa_circ_0029531	http://www.circbase.org/cgi-bin/singlerecord.cgi?id=hsa_circ_0029531
hsa_circ:chr12:133257193-133257865	POLE	0	7.18284	0	0	-4.19854	0.382922	hsa_circ_0029541	http://www.circbase.org/cgi-bin/singlerecord.cgi?id=hsa_circ_0029541
hsa_circ:chr12:133291444-133294706	PGAM5	0	0	4.84979	0	3.88232	0.42174	hsa_circ_0029545	http://www.circbase.org/cgi-bin/singlerecord.cgi?id=hsa_circ_0029545
hsa_circ:chr12:133306265-133306856	ANKLE2	0	2.39428	0	0	-2.6212	0.590064	NA	NA
hsa_circ:chr12:133310971-133312098	ANKLE2	0	31.1257	22.3091	25.7922	0.624731	0.806746	hsa_circ_0006903	http://www.circbase.org/cgi-bin/singlerecord.cgi?id=hsa_circ_0006903
hsa_circ:chr12:133324418-133331719	ANKLE2	10.0918	0	5.81975	0	-0.785923	0.861559	hsa_circ_0008567	http://www.circbase.org/cgi-bin/singlerecord.cgi?id=hsa_circ_0008567
hsa_circ:chr12:133357384-133359079	GOLGA3	0	0	0	16.4132	5.63365	0.240419	NA	NA
hsa_circ:chr12:133357384-133360893	GOLGA3	0	22.3466	0	0	-5.83315	0.22365	hsa_circ_0007438	http://www.circbase.org/cgi-bin/singlerecord.cgi?id=hsa_circ_0007438
hsa_circ:chr12:133522207-133524856	ZNF605	0	0	3.87984	0	3.56175	0.462171	NA	NA
hsa_circ:chr12:133617864-133625434	ZNF84	5.04592	0	0	0	-3.67914	0.445627	NA	NA
hsa_circ:chr12:1399018-1481143	ERC1	0	11.9714	14.5494	0	0.280861	0.951271	hsa_circ_0024997	http://www.circbase.org/cgi-bin/singlerecord.cgi?id=hsa_circ_0024997
hsa_circ:chr12:14693698-14706346	PLBD1	0	5.58666	0	0	-3.83712	0.425951	NA	NA
hsa_circ:chr12:1480999-1517413	ERC1	0	0	4.84979	0	3.88232	0.42174	hsa_circ_0025000	http://www.circbase.org/cgi-bin/singlerecord.cgi?id=hsa_circ_0025000
hsa_circ:chr12:1480999-1553916	ERC1	0	15.9619	0	26.9645	0.75349	0.869437	hsa_circ_0006747	http://www.circbase.org/cgi-bin/singlerecord.cgi?id=hsa_circ_0006747
hsa_circ:chr12:16109870-16115881	DERA	0	3.99047	0	0	-3.3537	0.487777	hsa_circ_0025540	http://www.circbase.org/cgi-bin/singlerecord.cgi?id=hsa_circ_0025540
hsa_circ:chr12:1863424-1863680	ADIPOR2	5.04592	0	0	0	-3.67914	0.445627	hsa_circ_0025002	http://www.circbase.org/cgi-bin/singlerecord.cgi?id=hsa_circ_0025002
hsa_circ:chr12:1887020-1893239	ADIPOR2	6.05511	0	0	0	-3.94312	0.413042	hsa_circ_0025006	http://www.circbase.org/cgi-bin/singlerecord.cgi?id=hsa_circ_0025006
hsa_circ:chr12:19498776-19501453	PLEKHA5	0	18.3562	0	0	-5.54965	0.247158	NA	NA
hsa_circ:chr12:19498776-19506936	PLEKHA5	6.05511	0	0	0	-3.94312	0.413042	NA	NA
hsa_circ:chr12:19615444-19626289	AEBP2	25.2296	37.5104	31.0387	29.3093	-0.058541	0.943936	hsa_circ_0006420	http://www.circbase.org/cgi-bin/singlerecord.cgi?id=hsa_circ_0006420
hsa_circ:chr12:19615444-19653155	AEBP2	0	5.58666	9.69959	0	0.792993	0.846097	hsa_circ_0006128	http://www.circbase.org/cgi-bin/singlerecord.cgi?id=hsa_circ_0006128
hsa_circ:chr12:19615444-19667718	AEBP2	5.04592	0	0	0	-3.67914	0.445627	hsa_circ_0025554	http://www.circbase.org/cgi-bin/singlerecord.cgi?id=hsa_circ_0025554
hsa_circ:chr12:19626182-19653155	AEBP2	15.1378	11.1733	0	0	-6.06703	0.0509566	hsa_circ_0005257	http://www.circbase.org/cgi-bin/singlerecord.cgi?id=hsa_circ_0005257
hsa_circ:chr12:19646734-19653155	AEBP2	0	3.99047	0	0	-3.3537	0.487777	hsa_circ_0025559	http://www.circbase.org/cgi-bin/singlerecord.cgi?id=hsa_circ_0025559
hsa_circ:chr12:22631247-22637822	C2CD5	0	3.19238	0	0	-3.03348	0.531288	NA	NA
hsa_circ:chr12:22643057-22659753	C2CD5	10.0918	0	0	3.51711	-1.52639	0.722825	hsa_circ_0008769	http://www.circbase.org/cgi-bin/singlerecord.cgi?id=hsa_circ_0008769
hsa_circ:chr12:26703180-26714885	ITPR2	0	3.19238	0	0	-3.03348	0.531288	NA	NA
hsa_circ:chr12:27132717-27143560	TM7SF3	0	13.5676	0	12.8961	-0.0776445	0.986522	hsa_circ_0025705	http://www.circbase.org/cgi-bin/singlerecord.cgi?id=hsa_circ_0025705
hsa_circ:chr12:27143383-27148341	TM7SF3	3.02755	0	7.75967	0	1.37209	0.75982	hsa_circ_0025712	http://www.circbase.org/cgi-bin/singlerecord.cgi?id=hsa_circ_0025712
hsa_circ:chr12:27148170-27156323	TM7SF3	0	3.99047	14.5494	0	1.86053	0.673737	NA	NA
hsa_circ:chr12:27149675-27152609	TM7SF3	7.06429	34.318	19.3992	30.4816	0.259122	0.815132	hsa_circ_0007683	http://www.circbase.org/cgi-bin/singlerecord.cgi?id=hsa_circ_0007683
hsa_circ:chr12:27521195-27523163	ARNTL2	8.07348	8.77903	11.6395	0	-0.526844	0.842362	hsa_circ_0009009	http://www.circbase.org/cgi-bin/singlerecord.cgi?id=hsa_circ_0009009
hsa_circ:chr12:27521195-27529320	ARNTL2	6.05511	0	0	0	-3.94312	0.413042	hsa_circ_0025720	http://www.circbase.org/cgi-bin/singlerecord.cgi?id=hsa_circ_0025720
hsa_circ:chr12:27521195-27533337	ARNTL2	15.1378	23.9428	15.5193	45.7225	0.639609	0.525307	hsa_circ_0001964	http://www.circbase.org/cgi-bin/singlerecord.cgi?id=hsa_circ_0001964
hsa_circ:chr12:27521195-27543172	ARNTL2	0	11.1733	0	0	-4.8345	0.314073	hsa_circ_0025721	http://www.circbase.org/cgi-bin/singlerecord.cgi?id=hsa_circ_0025721
hsa_circ:chr12:27867713-27877119	MRPS35	51.4684	54.2704	39.7683	30.4816	-0.587825	0.379142	hsa_circ_0000384	http://www.circbase.org/cgi-bin/singlerecord.cgi?id=hsa_circ_0000384
hsa_circ:chr12:28458582-28460682	CCDC91	10.0918	10.3752	10.6695	18.7579	0.521418	0.742399	hsa_circ_0007723	http://www.circbase.org/cgi-bin/singlerecord.cgi?id=hsa_circ_0007723
hsa_circ:chr12:28458582-28544344	CCDC91	3.02755	0	0	0	-2.93848	0.544567	hsa_circ_0008250	http://www.circbase.org/cgi-bin/singlerecord.cgi?id=hsa_circ_0008250
hsa_circ:chr12:2910283-2910522	FKBP4	0	5.58666	0	0	-3.83712	0.425951	NA	NA
hsa_circ:chr12:2926389-2927519	ITFG2	0	6.38475	0	0	-4.02912	0.402745	NA	NA
hsa_circ:chr12:2929252-2930958	ITFG2	7.06429	0	7.75967	0	0.145219	0.9721	hsa_circ_0000374	http://www.circbase.org/cgi-bin/singlerecord.cgi?id=hsa_circ_0000374
hsa_circ:chr12:2973486-2975687	FOXM1	0	6.38475	0	0	-4.02912	0.402745	hsa_circ_0025034	http://www.circbase.org/cgi-bin/singlerecord.cgi?id=hsa_circ_0025034
hsa_circ:chr12:2975559-2977920	FOXM1	0	4.78856	0	0	-3.61557	0.453691	hsa_circ_0025039	http://www.circbase.org/cgi-bin/singlerecord.cgi?id=hsa_circ_0025039
hsa_circ:chr12:3018695-3031568	TULP3	0	0	7.75967	0	4.55829	0.343757	hsa_circ_0025044	http://www.circbase.org/cgi-bin/singlerecord.cgi?id=hsa_circ_0025044
hsa_circ:chr12:30887902-30894040	CAPRIN2	0	3.19238	0	0	-3.03348	0.531288	hsa_circ_0025785	http://www.circbase.org/cgi-bin/singlerecord.cgi?id=hsa_circ_0025785
hsa_circ:chr12:3103904-3121398	TEAD4	7.06429	0	0	0	-4.16619	0.386659	NA	NA
hsa_circ:chr12:31237517-31238060	DDX11	33.3031	17.5581	7.75967	25.7922	-0.604561	0.593248	NA	NA
hsa_circ:chr12:31586089-31595859	DENND5B	4.03674	0	0	0	-3.35581	0.487497	hsa_circ_0025821	http://www.circbase.org/cgi-bin/singlerecord.cgi?id=hsa_circ_0025821
hsa_circ:chr12:32458631-32459056	BICD1	14.1286	15.9619	9.69959	2.34474	-1.31282	0.481021	hsa_circ_0025839	http://www.circbase.org/cgi-bin/singlerecord.cgi?id=hsa_circ_0025839
hsa_circ:chr12:32751431-32754357	FGD4	0	4.78856	9.69959	0	1.01448	0.808082	NA	NA
hsa_circ:chr12:32751431-32764217	FGD4	0	6.38475	0	10.5513	0.717124	0.874363	hsa_circ_0025843	http://www.circbase.org/cgi-bin/singlerecord.cgi?id=hsa_circ_0025843
hsa_circ:chr12:32760891-32764217	FGD4	32.2939	0	12.6095	26.9645	0.295235	0.912984	hsa_circ_0000390	http://www.circbase.org/cgi-bin/singlerecord.cgi?id=hsa_circ_0000390
hsa_circ:chr12:32866143-32871697	DNM1L	0	2.39428	0	0	-2.6212	0.590064	hsa_circ_0025852	http://www.circbase.org/cgi-bin/singlerecord.cgi?id=hsa_circ_0025852
hsa_circ:chr12:32866143-32875567	DNM1L	0	0	10.6695	0	5.01674	0.296603	hsa_circ_0025853	http://www.circbase.org/cgi-bin/singlerecord.cgi?id=hsa_circ_0025853
hsa_circ:chr12:32974290-32977096	PKP2	0	7.98094	0	0	-4.35014	0.36571	NA	NA
hsa_circ:chr12:33003700-33003907	PKP2	5.04592	6.38475	0	0	-4.86508	0.269322	NA	NA
hsa_circ:chr12:33003700-33021996	PKP2	0	0	4.84979	0	3.88232	0.42174	NA	NA
hsa_circ:chr12:42604157-42604482	YAF2	36.3306	0	29.0988	51.5843	1.15317	0.670361	hsa_circ_0000392	http://www.circbase.org/cgi-bin/singlerecord.cgi?id=hsa_circ_0000392
hsa_circ:chr12:42745687-42792796	PPHLN1	0	8.77903	0	0	-4.48731	0.350567	hsa_circ_0004815	http://www.circbase.org/cgi-bin/singlerecord.cgi?id=hsa_circ_0004815
hsa_circ:chr12:42748963-42792796	PPHLN1	0	8.77903	0	0	-4.48731	0.350567	hsa_circ_0006189	http://www.circbase.org/cgi-bin/singlerecord.cgi?id=hsa_circ_0006189
hsa_circ:chr12:42768665-42792796	PPHLN1	16.147	0	16.4893	0	0.0339114	0.994105	hsa_circ_0003961	http://www.circbase.org/cgi-bin/singlerecord.cgi?id=hsa_circ_0003961
hsa_circ:chr12:432248-432947	KDM5A	0	0	1.93992	0	2.56807	0.600374	NA	NA
hsa_circ:chr12:45725078-45751207	ANO6	8.07348	0	0	0	-4.35935	0.364681	hsa_circ_0003433	http://www.circbase.org/cgi-bin/singlerecord.cgi?id=hsa_circ_0003433
hsa_circ:chr12:459787-461490	KDM5A	16.147	0	0	0	-5.36115	0.263727	hsa_circ_0006599	http://www.circbase.org/cgi-bin/singlerecord.cgi?id=hsa_circ_0006599
hsa_circ:chr12:459787-463400	KDM5A	16.147	0	0	8.20659	-0.977966	0.8318	hsa_circ_0002881	http://www.circbase.org/cgi-bin/singlerecord.cgi?id=hsa_circ_0002881
hsa_circ:chr12:459787-465703	KDM5A	0	15.9619	0	0	-5.34827	0.264887	hsa_circ_0024946	http://www.circbase.org/cgi-bin/singlerecord.cgi?id=hsa_circ_0024946
hsa_circ:chr12:459787-475270	KDM5A	7.06429	0	0	0	-4.16619	0.386659	NA	NA
hsa_circ:chr12:46285563-46287504	ARID2	0	22.3466	0	0	-5.83315	0.22365	hsa_circ_0004985	http://www.circbase.org/cgi-bin/singlerecord.cgi?id=hsa_circ_0004985
hsa_circ:chr12:46591503-46592526	SLC38A1	0	0	0	17.5856	5.7333	0.232111	NA	NA
hsa_circ:chr12:46622936-46637097	SLC38A1	38.349	33.5199	32.0086	17.5856	-0.529604	0.534597	hsa_circ_0000396	http://www.circbase.org/cgi-bin/singlerecord.cgi?id=hsa_circ_0000396
hsa_circ:chr12:46633462-46637097	SLC38A1	35.3215	21.5485	0	41.033	-0.472547	0.860036	hsa_circ_0000398	http://www.circbase.org/cgi-bin/singlerecord.cgi?id=hsa_circ_0000398
hsa_circ:chr12:46633462-46648719	SLC38A1	20.1837	19.9523	6.78971	0	-2.54176	0.189981	NA	NA
hsa_circ:chr12:48477374-48491907	SENP1	4.03674	0	3.87984	0	-0.0422985	0.992649	hsa_circ_0006222	http://www.circbase.org/cgi-bin/singlerecord.cgi?id=hsa_circ_0006222
hsa_circ:chr12:49227060-49228280	DDX23	15.1378	0	0	0	-5.26792	0.272203	NA	NA
hsa_circ:chr12:49333438-49334971	ARF3	84.7715	95.7713	48.4979	35.1711	-1.10661	0.0407108	hsa_circ_0003770	http://www.circbase.org/cgi-bin/singlerecord.cgi?id=hsa_circ_0003770
hsa_circ:chr12:49854553-49893988	SPATS2	0	3.19238	0	0	-3.03348	0.531288	NA	NA
hsa_circ:chr12:50385781-50386438	RACGAP1	0	13.5676	28.1288	45.7225	2.43492	0.274341	hsa_circ_0009035	http://www.circbase.org/cgi-bin/singlerecord.cgi?id=hsa_circ_0009035
hsa_circ:chr12:50821545-50822873	LARP4	19.1745	18.3562	22.3091	12.8961	-0.0887589	0.940192	hsa_circ_0003873	http://www.circbase.org/cgi-bin/singlerecord.cgi?id=hsa_circ_0003873
hsa_circ:chr12:50821545-50824353	LARP4	11.101	14.3657	19.3992	32.8264	1.03135	0.363656	hsa_circ_0003664	http://www.circbase.org/cgi-bin/singlerecord.cgi?id=hsa_circ_0003664
hsa_circ:chr12:50821545-50829407	LARP4	11.101	0	7.75967	0	-0.510235	0.911904	NA	NA
hsa_circ:chr12:50821545-50835426	LARP4	0	8.77903	0	0	-4.48731	0.350567	hsa_circ_0026228	http://www.circbase.org/cgi-bin/singlerecord.cgi?id=hsa_circ_0026228
hsa_circ:chr12:50847243-50848200	LARP4	0	0	0	15.2408	5.5266	0.249579	hsa_circ_0026238	http://www.circbase.org/cgi-bin/singlerecord.cgi?id=hsa_circ_0026238
hsa_circ:chr12:50848097-50855130	LARP4	0	4.78856	10.6695	0	1.15144	0.777029	hsa_circ_0003222	http://www.circbase.org/cgi-bin/singlerecord.cgi?id=hsa_circ_0003222
hsa_circ:chr12:50854918-50856413	LARP4	0	0	0	3.51711	3.40518	0.482694	hsa_circ_0026240	http://www.circbase.org/cgi-bin/singlerecord.cgi?id=hsa_circ_0026240
hsa_circ:chr12:51019759-51054102	DIP2B	4.03674	0	0	0	-3.35581	0.487497	hsa_circ_0026244	http://www.circbase.org/cgi-bin/singlerecord.cgi?id=hsa_circ_0026244
hsa_circ:chr12:51064969-51069231	DIP2B	0	3.19238	0	0	-3.03348	0.531288	hsa_circ_0026252	http://www.circbase.org/cgi-bin/singlerecord.cgi?id=hsa_circ_0026252
hsa_circ:chr12:51086732-51108379	DIP2B	0	0	5.81975	0	4.14443	0.390315	NA	NA
hsa_circ:chr12:51122331-51126319	DIP2B	0	5.58666	0	0	-3.83712	0.425951	hsa_circ_0026275	http://www.circbase.org/cgi-bin/singlerecord.cgi?id=hsa_circ_0026275
hsa_circ:chr12:51173923-51203372	ATF1	0	14.3657	6.78971	7.03422	-0.06163	0.981736	NA	NA
hsa_circ:chr12:51402259-51404549	SLC11A2	24.2204	0	14.5494	22.275	0.607888	0.813021	hsa_circ_0008802	http://www.circbase.org/cgi-bin/singlerecord.cgi?id=hsa_circ_0008802
hsa_circ:chr12:51442817-51451911	LETMD1	8.07348	0	0	7.03422	-0.199124	0.965191	hsa_circ_0006668	http://www.circbase.org/cgi-bin/singlerecord.cgi?id=hsa_circ_0006668
hsa_circ:chr12:51449618-51450285	LETMD1	0	0	6.78971	0	4.36615	0.364903	hsa_circ_0004313	http://www.circbase.org/cgi-bin/singlerecord.cgi?id=hsa_circ_0004313
hsa_circ:chr12:51467606-51467865	CSRNP2	8.07348	0	0	25.7922	1.67824	0.715059	hsa_circ_0004538	http://www.circbase.org/cgi-bin/singlerecord.cgi?id=hsa_circ_0004538
hsa_circ:chr12:51770979-51773668	GALNT6	0	0	4.84979	0	3.88232	0.42174	hsa_circ_0005302	http://www.circbase.org/cgi-bin/singlerecord.cgi?id=hsa_circ_0005302
hsa_circ:chr12:518534-527802	CCDC77	5.04592	0	10.6695	0	1.08942	0.807663	NA	NA
hsa_circ:chr12:52380602-52385777	ACVR1B	0	0	0	14.0684	5.41091	0.253109	hsa_circ_0003729	http://www.circbase.org/cgi-bin/singlerecord.cgi?id=hsa_circ_0003729
hsa_circ:chr12:53421566-53421972	EIF4B	45.4133	80.6075	0	96.1344	-0.391402	0.894056	hsa_circ_0007889	http://www.circbase.org/cgi-bin/singlerecord.cgi?id=hsa_circ_0007889
hsa_circ:chr12:53427590-53431406	EIF4B	0	3.19238	0	0	-3.03348	0.531288	hsa_circ_0026532	http://www.circbase.org/cgi-bin/singlerecord.cgi?id=hsa_circ_0026532
hsa_circ:chr12:53494496-53494944	IGFBP6	0	0	5.81975	0	4.14443	0.390315	NA	NA
hsa_circ:chr12:53670404-53671011	ESPL1	17.1561	6.38475	26.1889	31.654	1.30562	0.247445	hsa_circ_0000402	http://www.circbase.org/cgi-bin/singlerecord.cgi?id=hsa_circ_0000402
hsa_circ:chr12:56182859-56197512	SARNP	13.1194	0	0	0	-5.06117	0.291667	hsa_circ_0002737	http://www.circbase.org/cgi-bin/singlerecord.cgi?id=hsa_circ_0002737
hsa_circ:chr12:56480315-56482652	ERBB3	0	6.38475	0	0	-4.02912	0.402745	hsa_circ_0026810	http://www.circbase.org/cgi-bin/singlerecord.cgi?id=hsa_circ_0026810
hsa_circ:chr12:56563313-56563992	SMARCC2	0	9.57713	0	0	-4.61256	0.337098	NA	NA
hsa_circ:chr12:56604081-56604352	RNF41	18.1653	9.57713	0	0	-6.14295	0.0430162	hsa_circ_0026911	http://www.circbase.org/cgi-bin/singlerecord.cgi?id=hsa_circ_0026911
hsa_circ:chr12:56662843-56663345	COQ10A	0	0	4.84979	0	3.88232	0.42174	NA	NA
hsa_circ:chr12:56676204-56676775	CS	7.06429	17.5581	20.3691	0	-0.270439	0.911407	hsa_circ_0026981	http://www.circbase.org/cgi-bin/singlerecord.cgi?id=hsa_circ_0026981
hsa_circ:chr12:56676204-56677641	CS	0	0	0	3.51711	3.40518	0.482694	hsa_circ_0026982	http://www.circbase.org/cgi-bin/singlerecord.cgi?id=hsa_circ_0026982
hsa_circ:chr12:56742313-56743420	STAT2	7.06429	0	0	0	-4.16619	0.386659	hsa_circ_0008085	http://www.circbase.org/cgi-bin/singlerecord.cgi?id=hsa_circ_0008085
hsa_circ:chr12:56824665-56826305	TIMELESS	11.101	0	0	0	-4.81976	0.315569	hsa_circ_0027017	http://www.circbase.org/cgi-bin/singlerecord.cgi?id=hsa_circ_0027017
hsa_circ:chr12:56826810-56828015	TIMELESS	0	9.57713	0	0	-4.61256	0.337098	NA	NA
hsa_circ:chr12:56997143-56999111	BAZ2A	22.2021	24.7409	18.4292	0	-1.34281	0.555269	hsa_circ_0004843	http://www.circbase.org/cgi-bin/singlerecord.cgi?id=hsa_circ_0004843
hsa_circ:chr12:56998001-56999111	BAZ2A	8.07348	8.77903	0	0	-5.4249	0.159539	hsa_circ_0027058	http://www.circbase.org/cgi-bin/singlerecord.cgi?id=hsa_circ_0027058
hsa_circ:chr12:57036242-57037742	ATP5B	13.1194	13.5676	0	0	-6.08803	0.0484608	NA	NA
hsa_circ:chr12:57037187-57039137	ATP5B	0	0	3.87984	0	3.56175	0.462171	hsa_circ_0027086	http://www.circbase.org/cgi-bin/singlerecord.cgi?id=hsa_circ_0027086
hsa_circ:chr12:57059988-57064148	PTGES3	21.1929	21.5485	0	18.7579	-1.19387	0.614353	hsa_circ_0027089	http://www.circbase.org/cgi-bin/singlerecord.cgi?id=hsa_circ_0027089
hsa_circ:chr12:57059988-57066849	PTGES3	0	0	0	9.37896	4.82502	0.315758	hsa_circ_0027090	http://www.circbase.org/cgi-bin/singlerecord.cgi?id=hsa_circ_0027090
hsa_circ:chr12:57064059-57066849	PTGES3	7.06429	3.99047	5.81975	0	-0.915712	0.79078	hsa_circ_0027093	http://www.circbase.org/cgi-bin/singlerecord.cgi?id=hsa_circ_0027093
hsa_circ:chr12:57065533-57066849	PTGES3	0	0	5.81975	0	4.14443	0.390315	hsa_circ_0008137	http://www.circbase.org/cgi-bin/singlerecord.cgi?id=hsa_circ_0008137
hsa_circ:chr12:57493779-57496704	STAT6	0	0	0	11.7237	5.14754	0.284	hsa_circ_0027122	http://www.circbase.org/cgi-bin/singlerecord.cgi?id=hsa_circ_0027122
hsa_circ:chr12:57641909-57644976	STAC3	0	0	6.78971	0	4.36615	0.364903	hsa_circ_0027236	http://www.circbase.org/cgi-bin/singlerecord.cgi?id=hsa_circ_0027236
hsa_circ:chr12:57891940-57892406	MARS	0	20.7504	0	16.4132	-0.341456	0.940658	hsa_circ_0027261	http://www.circbase.org/cgi-bin/singlerecord.cgi?id=hsa_circ_0027261
hsa_circ:chr12:57927736-57928235	DCTN2	8.07348	13.5676	0	16.4132	-0.407346	0.859089	hsa_circ_0006104	http://www.circbase.org/cgi-bin/singlerecord.cgi?id=hsa_circ_0006104
hsa_circ:chr12:62708571-62719714	USP15	4.03674	0	0	0	-3.35581	0.487497	hsa_circ_0027352	http://www.circbase.org/cgi-bin/singlerecord.cgi?id=hsa_circ_0027352
hsa_circ:chr12:62938678-62946954	MON2	7.06429	0	0	0	-4.16619	0.386659	NA	NA
hsa_circ:chr12:62974077-62981936	MON2	4.03674	0	0	0	-3.35581	0.487497	NA	NA
hsa_circ:chr12:63083479-63114069	PPM1H	11.101	15.9619	0	9.37896	-1.54144	0.506031	NA	NA
hsa_circ:chr12:63182006-63195940	PPM1H	2.01837	0	0	0	-2.34908	0.630393	NA	NA
hsa_circ:chr12:64502712-64509673	ENSG00000255817.1,SRGAP1	0	0	9.69959	0	4.8795	0.310232	hsa_circ_0002695	http://www.circbase.org/cgi-bin/singlerecord.cgi?id=hsa_circ_0002695
hsa_circ:chr12:6463604-6471407	SCNN1A	0	5.58666	0	0	-3.83712	0.425951	NA	NA
hsa_circ:chr12:64878083-64879797	TBK1	0	1.59619	0	0	-2.0415	0.676651	hsa_circ_0000413	http://www.circbase.org/cgi-bin/singlerecord.cgi?id=hsa_circ_0000413
hsa_circ:chr12:65258448-65260683	TBC1D30	4.03674	8.77903	0	0	-5.03081	0.243404	hsa_circ_0027440	http://www.circbase.org/cgi-bin/singlerecord.cgi?id=hsa_circ_0027440
hsa_circ:chr12:6618883-6620418	NCAPD2	10.0918	15.1638	0	5.86185	-2.12382	0.399212	hsa_circ_0025148	http://www.circbase.org/cgi-bin/singlerecord.cgi?id=hsa_circ_0025148
hsa_circ:chr12:6630964-6632512	NCAPD2	7.06429	11.1733	12.6095	0	-0.526317	0.836207	hsa_circ_0025162	http://www.circbase.org/cgi-bin/singlerecord.cgi?id=hsa_circ_0025162
hsa_circ:chr12:6672481-6672937	NOP2	0	4.78856	0	0	-3.61557	0.453691	NA	NA
hsa_circ:chr12:6690210-6690980	CHD4	0	13.5676	4.84979	0	-1.48034	0.740178	hsa_circ_0025219	http://www.circbase.org/cgi-bin/singlerecord.cgi?id=hsa_circ_0025219
hsa_circ:chr12:6696550-6697588	CHD4	12.1102	18.3562	9.69959	0	-1.63945	0.449787	NA	NA
hsa_circ:chr12:6859014-6859932	MLF2	25.2296	0	0	45.7225	0.858369	0.851192	hsa_circ_0007845	http://www.circbase.org/cgi-bin/singlerecord.cgi?id=hsa_circ_0007845
hsa_circ:chr12:69044180-69048032	RAP1B	0	0	3.87984	0	3.56175	0.462171	hsa_circ_0027464	http://www.circbase.org/cgi-bin/singlerecord.cgi?id=hsa_circ_0027464
hsa_circ:chr12:69084411-69094633	NUP107	0	0	0	12.8961	5.28526	0.271134	NA	NA
hsa_circ:chr12:69090599-69096564	NUP107	10.0918	0	0	0	-4.682	0.329779	hsa_circ_0027471	http://www.circbase.org/cgi-bin/singlerecord.cgi?id=hsa_circ_0027471
hsa_circ:chr12:69109407-69119576	NUP107	0	7.98094	10.6695	0	0.417809	0.926781	hsa_circ_0003599	http://www.circbase.org/cgi-bin/singlerecord.cgi?id=hsa_circ_0003599
hsa_circ:chr12:69210592-69218431	MDM2	0	46.2894	44.6181	17.5856	0.425093	0.877472	hsa_circ_0027491	http://www.circbase.org/cgi-bin/singlerecord.cgi?id=hsa_circ_0027491
hsa_circ:chr12:69210592-69222711	MDM2	13.1194	11.1733	0	0	-5.95211	0.0652718	hsa_circ_0027492	http://www.circbase.org/cgi-bin/singlerecord.cgi?id=hsa_circ_0027492
hsa_circ:chr12:69214105-69218431	MDM2	37.3398	28.7314	54.3177	0	-0.280868	0.916922	hsa_circ_0004448	http://www.circbase.org/cgi-bin/singlerecord.cgi?id=hsa_circ_0004448
hsa_circ:chr12:69214105-69222711	MDM2	20.1837	5.58666	0	10.5513	-1.29589	0.583075	hsa_circ_0000416	http://www.circbase.org/cgi-bin/singlerecord.cgi?id=hsa_circ_0000416
hsa_circ:chr12:69218143-69222711	MDM2	0	0	23.279	0	6.14081	0.200284	hsa_circ_0027494	http://www.circbase.org/cgi-bin/singlerecord.cgi?id=hsa_circ_0027494
hsa_circ:chr12:69222551-69230529	MDM2	0	15.1638	19.3992	17.5856	1.27848	0.572381	hsa_circ_0002770	http://www.circbase.org/cgi-bin/singlerecord.cgi?id=hsa_circ_0002770
hsa_circ:chr12:69229609-69230529	MDM2	0	7.18284	0	14.0684	0.963668	0.834342	NA	NA
hsa_circ:chr12:69644909-69656342	CPSF6	6.05511	15.1638	0	16.4132	-0.379725	0.870131	hsa_circ_0000417	http://www.circbase.org/cgi-bin/singlerecord.cgi?id=hsa_circ_0000417
hsa_circ:chr12:6978422-6978937	TPI1	0	1.59619	0	0	-2.0415	0.676651	hsa_circ_0025278	http://www.circbase.org/cgi-bin/singlerecord.cgi?id=hsa_circ_0025278
hsa_circ:chr12:69924645-69956054	FRS2	0	0	5.81975	0	4.14443	0.390315	hsa_circ_0005578	http://www.circbase.org/cgi-bin/singlerecord.cgi?id=hsa_circ_0005578
hsa_circ:chr12:69983265-69985939	CCT2	11.101	8.77903	13.5794	14.0684	0.477086	0.770834	hsa_circ_0000418	http://www.circbase.org/cgi-bin/singlerecord.cgi?id=hsa_circ_0000418
hsa_circ:chr12:69983265-69987393	CCT2	23.2112	24.7409	26.1889	29.3093	0.20962	0.819746	hsa_circ_0002940	http://www.circbase.org/cgi-bin/singlerecord.cgi?id=hsa_circ_0002940
hsa_circ:chr12:70149164-70150443	RAB3IP	0	11.1733	14.5494	0	0.380218	0.934084	NA	NA
hsa_circ:chr12:70193989-70195501	RAB3IP	45.4133	35.9142	35.8885	66.8251	0.334874	0.620283	hsa_circ_0000419	http://www.circbase.org/cgi-bin/singlerecord.cgi?id=hsa_circ_0000419
hsa_circ:chr12:70671912-70704797	CNOT2	12.1102	0	0	14.0684	0.216697	0.962398	hsa_circ_0007127	http://www.circbase.org/cgi-bin/singlerecord.cgi?id=hsa_circ_0007127
hsa_circ:chr12:70723203-70724249	CNOT2	0	0	0	4.68948	3.8221	0.429169	hsa_circ_0027556	http://www.circbase.org/cgi-bin/singlerecord.cgi?id=hsa_circ_0027556
hsa_circ:chr12:71526473-71532010	TSPAN8	0	9.57713	0	0	-4.61256	0.337098	NA	NA
hsa_circ:chr12:71946853-71947068	LGR5	0	0	3.87984	0	3.56175	0.462171	NA	NA
hsa_circ:chr12:72020040-72022817	ZFC3H1	9.08266	11.1733	0	28.1369	0.470297	0.853856	hsa_circ_0008912	http://www.circbase.org/cgi-bin/singlerecord.cgi?id=hsa_circ_0008912
hsa_circ:chr12:76844631-76881398	OSBPL8	8.07348	13.5676	0	0	-5.78637	0.0900036	hsa_circ_0027618	http://www.circbase.org/cgi-bin/singlerecord.cgi?id=hsa_circ_0027618
hsa_circ:chr12:8082280-8083238	SLC2A3	3.02755	12.7695	0	0	-5.3332	0.183978	NA	NA
hsa_circ:chr12:8192415-8192761	FOXJ2	0	3.99047	0	0	-3.3537	0.487777	hsa_circ_0025359	http://www.circbase.org/cgi-bin/singlerecord.cgi?id=hsa_circ_0025359
hsa_circ:chr12:8197356-8197554	FOXJ2	0	9.57713	0	0	-4.61256	0.337098	NA	NA
hsa_circ:chr12:83250789-83251359	TMTC2	0	8.77903	0	0	-4.48731	0.350567	hsa_circ_0002886	http://www.circbase.org/cgi-bin/singlerecord.cgi?id=hsa_circ_0002886
hsa_circ:chr12:88542065-88570096	TMTC3	10.0918	0	0	0	-4.682	0.329779	hsa_circ_0027689	http://www.circbase.org/cgi-bin/singlerecord.cgi?id=hsa_circ_0027689
hsa_circ:chr12:90003714-90005149	ATP2B1	0	0	9.69959	0	4.8795	0.310232	hsa_circ_0005290	http://www.circbase.org/cgi-bin/singlerecord.cgi?id=hsa_circ_0005290
hsa_circ:chr12:922808-939326	WNK1	2.01837	10.3752	0	0	-4.98338	0.254948	hsa_circ_0007892	http://www.circbase.org/cgi-bin/singlerecord.cgi?id=hsa_circ_0007892
hsa_circ:chr12:95528515-95535315	FGD6	0	4.78856	0	0	-3.61557	0.453691	hsa_circ_0027760	http://www.circbase.org/cgi-bin/singlerecord.cgi?id=hsa_circ_0027760
hsa_circ:chr12:95531298-95535315	FGD6	6.05511	4.78856	0	4.68948	-1.21864	0.735115	NA	NA
hsa_circ:chr12:95676089-95676420	VEZT	5.04592	0	0	0	-3.67914	0.445627	hsa_circ_0027771	http://www.circbase.org/cgi-bin/singlerecord.cgi?id=hsa_circ_0027771
hsa_circ:chr12:95688048-95690034	VEZT	9.08266	5.58666	0	14.0684	-0.0649512	0.980584	hsa_circ_0008775	http://www.circbase.org/cgi-bin/singlerecord.cgi?id=hsa_circ_0008775
hsa_circ:chr12:96717726-96728643	CDK17	18.1653	11.1733	15.5193	15.2408	0.0711372	0.958481	hsa_circ_0002762	http://www.circbase.org/cgi-bin/singlerecord.cgi?id=hsa_circ_0002762
hsa_circ:chr12:98921664-98931350	TMPO	27.248	7.98094	11.6395	8.20659	-0.821264	0.588586	hsa_circ_0003517	http://www.circbase.org/cgi-bin/singlerecord.cgi?id=hsa_circ_0003517
hsa_circ:chr12:99042097-99043462	APAF1	0	4.78856	0	0	-3.61557	0.453691	hsa_circ_0007394	http://www.circbase.org/cgi-bin/singlerecord.cgi?id=hsa_circ_0007394
hsa_circ:chr12:99071203-99080651	APAF1	2.01837	0	0	0	-2.34908	0.630393	hsa_circ_0004901	http://www.circbase.org/cgi-bin/singlerecord.cgi?id=hsa_circ_0004901
hsa_circ:chr13:100181721-100190117	TM9SF2	0	0	5.81975	0	4.14443	0.390315	NA	NA
hsa_circ:chr13:100861586-100925600	PCCA	0	3.99047	0	0	-3.3537	0.487777	NA	NA
hsa_circ:chr13:100909849-100925600	PCCA	112.02	0	40.7383	94.962	0.277112	0.92781	hsa_circ_0000500	http://www.circbase.org/cgi-bin/singlerecord.cgi?id=hsa_circ_0000500
hsa_circ:chr13:100909849-100992513	PCCA	0	6.38475	0	0	-4.02912	0.402745	NA	NA
hsa_circ:chr13:100953714-100962162	PCCA	43.3949	28.7314	55.2877	38.6882	0.387656	0.582525	hsa_circ_0002664	http://www.circbase.org/cgi-bin/singlerecord.cgi?id=hsa_circ_0002664
hsa_circ:chr13:100953714-100982925	PCCA	0	2.39428	0	5.86185	1.27447	0.78096	hsa_circ_0002880	http://www.circbase.org/cgi-bin/singlerecord.cgi?id=hsa_circ_0002880
hsa_circ:chr13:100953714-100992513	PCCA	4.03674	0	0	0	-3.35581	0.487497	hsa_circ_0030763	http://www.circbase.org/cgi-bin/singlerecord.cgi?id=hsa_circ_0030763
hsa_circ:chr13:100982815-100992513	PCCA	0	0	4.84979	19.9303	6.22805	0.0544302	hsa_circ_0008420	http://www.circbase.org/cgi-bin/singlerecord.cgi?id=hsa_circ_0008420
hsa_circ:chr13:100982815-101020828	PCCA	0	0	9.69959	0	4.8795	0.310232	hsa_circ_0030771	http://www.circbase.org/cgi-bin/singlerecord.cgi?id=hsa_circ_0030771
hsa_circ:chr13:101308635-101322823	TMTC4	8.07348	0	2.90988	0	-1.45816	0.745216	NA	NA
hsa_circ:chr13:101320833-101322823	TMTC4	0	3.19238	0	0	-3.03348	0.531288	NA	NA
hsa_circ:chr13:103268746-103275390	TPP2	0	3.19238	0	0	-3.03348	0.531288	NA	NA
hsa_circ:chr13:103275227-103280274	TPP2	17.1561	13.5676	16.4893	0	-0.890133	0.691048	hsa_circ_0008881	http://www.circbase.org/cgi-bin/singlerecord.cgi?id=hsa_circ_0008881
hsa_circ:chr13:103275227-103288742	TPP2	0	3.19238	0	0	-3.03348	0.531288	NA	NA
hsa_circ:chr13:103468778-103474509	BIVM,BIVM-ERCC5	0	0	3.87984	0	3.56175	0.462171	hsa_circ_0006288	http://www.circbase.org/cgi-bin/singlerecord.cgi?id=hsa_circ_0006288
hsa_circ:chr13:107164877-107165160	EFNB2	0	6.38475	0	0	-4.02912	0.402745	NA	NA
hsa_circ:chr13:107209396-107212005	ARGLU1	0	11.1733	0	0	-4.8345	0.314073	NA	NA
hsa_circ:chr13:111274563-111276626	NAXD	0	0	22.3091	0	6.07946	0.204857	hsa_circ_0030883	http://www.circbase.org/cgi-bin/singlerecord.cgi?id=hsa_circ_0030883
hsa_circ:chr13:111274563-111279894	NAXD	21.1929	21.5485	22.3091	0	-0.933198	0.692662	hsa_circ_0030885	http://www.circbase.org/cgi-bin/singlerecord.cgi?id=hsa_circ_0030885
hsa_circ:chr13:111274563-111287935	NAXD	0	4.78856	0	0	-3.61557	0.453691	hsa_circ_0030886	http://www.circbase.org/cgi-bin/singlerecord.cgi?id=hsa_circ_0030886
hsa_circ:chr13:111329321-111340365	CARS2	0	9.57713	4.84979	0	-0.978458	0.815246	hsa_circ_0003719	http://www.circbase.org/cgi-bin/singlerecord.cgi?id=hsa_circ_0003719
hsa_circ:chr13:111857636-111870227	ARHGEF7	0	0	0	18.7579	5.82651	0.224528	hsa_circ_0000503	http://www.circbase.org/cgi-bin/singlerecord.cgi?id=hsa_circ_0000503
hsa_circ:chr13:111857636-111885640	ARHGEF7	0	15.1638	0	0	-5.27437	0.271611	hsa_circ_0030914	http://www.circbase.org/cgi-bin/singlerecord.cgi?id=hsa_circ_0030914
hsa_circ:chr13:111870026-111885640	ARHGEF7	0	0	16.4893	31.654	7.18678	0.00181317	NA	NA
hsa_circ:chr13:111870026-111896641	ARHGEF7	27.248	16.76	14.5494	12.8961	-0.677842	0.572479	hsa_circ_0009141	http://www.circbase.org/cgi-bin/singlerecord.cgi?id=hsa_circ_0009141
hsa_circ:chr13:113170754-113176823	TUBGCP3	0	9.57713	0	0	-4.61256	0.337098	hsa_circ_0030936	http://www.circbase.org/cgi-bin/singlerecord.cgi?id=hsa_circ_0030936
hsa_circ:chr13:113170754-113181798	TUBGCP3	31.2847	23.9428	46.558	21.1027	0.299498	0.728693	hsa_circ_0000504	http://www.circbase.org/cgi-bin/singlerecord.cgi?id=hsa_circ_0000504
hsa_circ:chr13:113200013-113202490	TUBGCP3	0	7.98094	0	0	-4.35014	0.36571	NA	NA
hsa_circ:chr13:113845186-113854830	PCID2	0	9.57713	0	4.68948	-1.04113	0.804944	hsa_circ_0000506	http://www.circbase.org/cgi-bin/singlerecord.cgi?id=hsa_circ_0000506
hsa_circ:chr13:113887491-113889459	CUL4A	0	0	4.84979	0	3.88232	0.42174	NA	NA
hsa_circ:chr13:113897282-113898828	CUL4A	0	0	8.72963	0	4.72782	0.325779	NA	NA
hsa_circ:chr13:113979976-113980406	GRTP1	0	0	0	16.4132	5.63365	0.240419	NA	NA
hsa_circ:chr13:113999178-114009796	GRTP1,GRTP1-AS1	4.03674	0	0	0	-3.35581	0.487497	NA	NA
hsa_circ:chr13:113999178-114018225	GRTP1	0	0	23.279	0	6.14081	0.200284	hsa_circ_0031007	http://www.circbase.org/cgi-bin/singlerecord.cgi?id=hsa_circ_0031007
hsa_circ:chr13:114128439-114138371	DCUN1D2	0	9.57713	0	3.51711	-1.4578	0.736837	hsa_circ_0031011	http://www.circbase.org/cgi-bin/singlerecord.cgi?id=hsa_circ_0031011
hsa_circ:chr13:114149817-114175048	TMCO3	0	0	15.5193	0	5.55647	0.246999	hsa_circ_0031017	http://www.circbase.org/cgi-bin/singlerecord.cgi?id=hsa_circ_0031017
hsa_circ:chr13:114157811-114175048	TMCO3	25.2296	19.1543	21.3391	10.5513	-0.470709	0.683883	hsa_circ_0007760	http://www.circbase.org/cgi-bin/singlerecord.cgi?id=hsa_circ_0007760
hsa_circ:chr13:114164553-114175048	TMCO3	23.2112	47.8856	28.1288	42.2053	-0.0231488	0.976836	hsa_circ_0008539	http://www.circbase.org/cgi-bin/singlerecord.cgi?id=hsa_circ_0008539
hsa_circ:chr13:114164553-114193822	TMCO3	0	2.39428	3.87984	0	0.691606	0.88087	hsa_circ_0031027	http://www.circbase.org/cgi-bin/singlerecord.cgi?id=hsa_circ_0031027
hsa_circ:chr13:114174931-114193822	TMCO3	0	7.98094	0	22.275	1.47577	0.748276	hsa_circ_0004361	http://www.circbase.org/cgi-bin/singlerecord.cgi?id=hsa_circ_0004361
hsa_circ:chr13:114526348-114531684	GAS6	0	0	13.5794	0	5.36411	0.261852	NA	NA
hsa_circ:chr13:114538486-114541164	GAS6,GAS6-AS1	0	7.18284	0	0	-4.19854	0.382922	hsa_circ_0004375	http://www.circbase.org/cgi-bin/singlerecord.cgi?id=hsa_circ_0004375
hsa_circ:chr13:115016024-115022705	CDC16	5.04592	0	0	8.20659	0.704393	0.870623	NA	NA
hsa_circ:chr13:20279802-20283739	PSPC1	0	0	0	19.9303	5.91406	0.21757	NA	NA
hsa_circ:chr13:20304379-20356931	PSPC1	0	3.99047	17.4593	0	2.12339	0.635966	hsa_circ_0029614	http://www.circbase.org/cgi-bin/singlerecord.cgi?id=hsa_circ_0029614
hsa_circ:chr13:20325411-20325607	PSPC1	0	7.18284	0	0	-4.19854	0.382922	hsa_circ_0007441	http://www.circbase.org/cgi-bin/singlerecord.cgi?id=hsa_circ_0007441
hsa_circ:chr13:20325411-20333558	PSPC1	18.1653	0	0	9.37896	-0.955024	0.835509	NA	NA
hsa_circ:chr13:20346382-20346683	PSPC1	0	3.19238	0	0	-3.03348	0.531288	NA	NA
hsa_circ:chr13:20425495-20426330	ZMYM5	7.06429	15.1638	14.5494	18.7579	0.577644	0.694564	hsa_circ_0002673	http://www.circbase.org/cgi-bin/singlerecord.cgi?id=hsa_circ_0002673
hsa_circ:chr13:20567203-20568059	ZMYM2	0	6.38475	0	0	-4.02912	0.402745	hsa_circ_0029624	http://www.circbase.org/cgi-bin/singlerecord.cgi?id=hsa_circ_0029624
hsa_circ:chr13:20576990-20580726	ZMYM2	15.1378	0	0	7.03422	-1.10769	0.810125	hsa_circ_0005966	http://www.circbase.org/cgi-bin/singlerecord.cgi?id=hsa_circ_0005966
hsa_circ:chr13:20600752-20611049	ZMYM2	23.2112	0	0	14.0684	-0.723055	0.874782	hsa_circ_0029630	http://www.circbase.org/cgi-bin/singlerecord.cgi?id=hsa_circ_0029630
hsa_circ:chr13:20605459-20611049	ZMYM2	4.03674	0	0	0	-3.35581	0.487497	NA	NA
hsa_circ:chr13:20625573-20641530	ZMYM2	0	3.99047	0	0	-3.3537	0.487777	hsa_circ_0029633	http://www.circbase.org/cgi-bin/singlerecord.cgi?id=hsa_circ_0029633
hsa_circ:chr13:21212471-21245178	IFT88	0	2.39428	0	0	-2.6212	0.590064	NA	NA
hsa_circ:chr13:21215429-21219097	IFT88	0	0	0	2.34474	2.81658	0.564129	NA	NA
hsa_circ:chr13:21305980-21306260	EEF1AKMT1	0	28.7314	0	0	-6.19541	0.196018	hsa_circ_0003285	http://www.circbase.org/cgi-bin/singlerecord.cgi?id=hsa_circ_0003285
hsa_circ:chr13:21381596-21384106	XPO4	0	0	0	4.68948	3.8221	0.429169	NA	NA
hsa_circ:chr13:21429766-21442840	XPO4	0	3.19238	0	0	-3.03348	0.531288	NA	NA
hsa_circ:chr13:21436856-21442840	XPO4	0	6.38475	0	0	-4.02912	0.402745	hsa_circ_0029684	http://www.circbase.org/cgi-bin/singlerecord.cgi?id=hsa_circ_0029684
hsa_circ:chr13:21742127-21742538	SKA3	41.3766	0	38.7984	60.9633	1.27154	0.64247	hsa_circ_0000467	http://www.circbase.org/cgi-bin/singlerecord.cgi?id=hsa_circ_0000467
hsa_circ:chr13:21875558-21875757	MIPEPP3	0	0	4.84979	0	3.88232	0.42174	NA	NA
hsa_circ:chr13:21955573-21965993	ZDHHC20	8.07348	25.539	22.3091	0	-0.588632	0.814251	hsa_circ_0029703	http://www.circbase.org/cgi-bin/singlerecord.cgi?id=hsa_circ_0029703
hsa_circ:chr13:21961647-21965993	ZDHHC20	0	1.59619	0	2.34474	0.524764	0.910285	hsa_circ_0029705	http://www.circbase.org/cgi-bin/singlerecord.cgi?id=hsa_circ_0029705
hsa_circ:chr13:21987791-21999817	ZDHHC20	0	0	5.81975	0	4.14443	0.390315	hsa_circ_0006732	http://www.circbase.org/cgi-bin/singlerecord.cgi?id=hsa_circ_0006732
hsa_circ:chr13:24164289-24190184	TNFRSF19	0	12.7695	0	0	-5.02682	0.294991	hsa_circ_0004196	http://www.circbase.org/cgi-bin/singlerecord.cgi?id=hsa_circ_0004196
hsa_circ:chr13:24164289-24200931	TNFRSF19	0	20.7504	0	0	-5.72634	0.232309	hsa_circ_0008784	http://www.circbase.org/cgi-bin/singlerecord.cgi?id=hsa_circ_0008784
hsa_circ:chr13:24233189-24234629	TNFRSF19	8.07348	15.9619	0	0	-5.938	0.0680454	hsa_circ_0029723	http://www.circbase.org/cgi-bin/singlerecord.cgi?id=hsa_circ_0029723
hsa_circ:chr13:24796957-24798720	SPATA13	43.3949	23.9428	25.2189	28.1369	-0.332805	0.697393	hsa_circ_0004865	http://www.circbase.org/cgi-bin/singlerecord.cgi?id=hsa_circ_0004865
hsa_circ:chr13:24823615-24826000	SPATA13	0	33.5199	0	0	-6.41764	0.180365	hsa_circ_0003040	http://www.circbase.org/cgi-bin/singlerecord.cgi?id=hsa_circ_0003040
hsa_circ:chr13:24858273-24865022	SPATA13	11.101	0	0	0	-4.81976	0.315569	NA	NA
hsa_circ:chr13:25033182-25034274	PARP4	0	0	7.75967	0	4.55829	0.343757	NA	NA
hsa_circ:chr13:25051839-25052414	PARP4	4.03674	7.98094	0	0	-4.93796	0.258752	NA	NA
hsa_circ:chr13:25835806-25840424	MTMR6	0	3.19238	0	0	-3.03348	0.531288	NA	NA
hsa_circ:chr13:26911704-26928017	CDK8	20.1837	19.1543	0	28.1369	-0.486741	0.847528	hsa_circ_0029803	http://www.circbase.org/cgi-bin/singlerecord.cgi?id=hsa_circ_0029803
hsa_circ:chr13:26974590-26975761	CDK8	8.07348	0	11.6395	14.0684	1.68379	0.487016	hsa_circ_0003489	http://www.circbase.org/cgi-bin/singlerecord.cgi?id=hsa_circ_0003489
hsa_circ:chr13:28141777-28143413	LNX2	0	0	2.90988	0	3.1489	0.517345	NA	NA
hsa_circ:chr13:28141777-28155940	LNX2	0	7.18284	0	0	-4.19854	0.382922	hsa_circ_0000468	http://www.circbase.org/cgi-bin/singlerecord.cgi?id=hsa_circ_0000468
hsa_circ:chr13:28155434-28155940	LNX2	13.1194	0	18.4292	0	0.49417	0.914282	hsa_circ_0029827	http://www.circbase.org/cgi-bin/singlerecord.cgi?id=hsa_circ_0029827
hsa_circ:chr13:28748409-28752072	PAN3	36.3306	48.6837	64.0173	21.1027	0.00612025	0.993526	hsa_circ_0004372	http://www.circbase.org/cgi-bin/singlerecord.cgi?id=hsa_circ_0004372
hsa_circ:chr13:28748409-28794515	PAN3	8.07348	0	0	0	-4.35935	0.364681	hsa_circ_0005831	http://www.circbase.org/cgi-bin/singlerecord.cgi?id=hsa_circ_0005831
hsa_circ:chr13:28771322-28794515	PAN3	9.08266	7.18284	0	0	-5.37328	0.171087	hsa_circ_0006597	http://www.circbase.org/cgi-bin/singlerecord.cgi?id=hsa_circ_0006597
hsa_circ:chr13:28830429-28835595	PAN3	0	11.1733	0	0	-4.8345	0.314073	hsa_circ_0008902	http://www.circbase.org/cgi-bin/singlerecord.cgi?id=hsa_circ_0008902
hsa_circ:chr13:28830429-28855516	PAN3	0	0	5.81975	0	4.14443	0.390315	hsa_circ_0029853	http://www.circbase.org/cgi-bin/singlerecord.cgi?id=hsa_circ_0029853
hsa_circ:chr13:28840852-28845003	PAN3	14.1286	7.98094	0	0	-5.81565	0.0853666	hsa_circ_0000469	http://www.circbase.org/cgi-bin/singlerecord.cgi?id=hsa_circ_0000469
hsa_circ:chr13:30104675-30110339	SLC7A1	15.1378	4.78856	15.5193	9.37896	0.328687	0.851699	hsa_circ_0006290	http://www.circbase.org/cgi-bin/singlerecord.cgi?id=hsa_circ_0006290
hsa_circ:chr13:30801549-30815223	KATNAL1	18.1653	10.3752	0	0	-6.18398	0.0387578	hsa_circ_0003587	http://www.circbase.org/cgi-bin/singlerecord.cgi?id=hsa_circ_0003587
hsa_circ:chr13:30814597-30815223	KATNAL1	9.08266	14.3657	0	0	-5.90201	0.0725995	hsa_circ_0029893	http://www.circbase.org/cgi-bin/singlerecord.cgi?id=hsa_circ_0029893
hsa_circ:chr13:30854200-30857928	KATNAL1	0	15.1638	0	14.0684	-0.112162	0.980517	hsa_circ_0008651	http://www.circbase.org/cgi-bin/singlerecord.cgi?id=hsa_circ_0008651
hsa_circ:chr13:31204972-31205611	USPL1	0	2.39428	16.4893	5.86185	3.19548	0.265084	hsa_circ_0005874	http://www.circbase.org/cgi-bin/singlerecord.cgi?id=hsa_circ_0005874
hsa_circ:chr13:32899213-32900750	BRCA2	0	0	10.6695	0	5.01674	0.296603	hsa_circ_0029930	http://www.circbase.org/cgi-bin/singlerecord.cgi?id=hsa_circ_0029930
hsa_circ:chr13:33091994-33101669	N4BP2L2	83.7623	65.4437	32.9786	57.4462	-0.726085	0.215	hsa_circ_0000471	http://www.circbase.org/cgi-bin/singlerecord.cgi?id=hsa_circ_0000471
hsa_circ:chr13:33222891-33226144	PDS5B	7.06429	3.19238	10.6695	0	0.065184	0.983303	hsa_circ_0029940	http://www.circbase.org/cgi-bin/singlerecord.cgi?id=hsa_circ_0029940
hsa_circ:chr13:33222891-33253066	PDS5B	0	3.99047	0	0	-3.3537	0.487777	hsa_circ_0029941	http://www.circbase.org/cgi-bin/singlerecord.cgi?id=hsa_circ_0029941
hsa_circ:chr13:33306238-33309467	PDS5B	26.2388	17.5581	18.4292	26.9645	0.0520321	0.95962	hsa_circ_0004494	http://www.circbase.org/cgi-bin/singlerecord.cgi?id=hsa_circ_0004494
hsa_circ:chr13:40293373-40301685	COG6	0	13.5676	0	8.20659	-0.730955	0.873932	hsa_circ_0006900	http://www.circbase.org/cgi-bin/singlerecord.cgi?id=hsa_circ_0006900
hsa_circ:chr13:41025201-41044299	LINC00598	0	0	0	4.68948	3.8221	0.429169	NA	NA
hsa_circ:chr13:41523942-41525572	ELF1	0	0	5.81975	0	4.14443	0.390315	NA	NA
hsa_circ:chr13:41814397-41835051	MTRF1	0	7.18284	0	0	-4.19854	0.382922	hsa_circ_0030060	http://www.circbase.org/cgi-bin/singlerecord.cgi?id=hsa_circ_0030060
hsa_circ:chr13:41826781-41835051	MTRF1	0	11.9714	9.69959	0	-0.303126	0.947508	hsa_circ_0008230	http://www.circbase.org/cgi-bin/singlerecord.cgi?id=hsa_circ_0008230
hsa_circ:chr13:41890982-41905505	NAA16	0	0	7.75967	0	4.55829	0.343757	hsa_circ_0030066	http://www.circbase.org/cgi-bin/singlerecord.cgi?id=hsa_circ_0030066
hsa_circ:chr13:41890982-41910892	NAA16	0	0	0	5.86185	4.14518	0.390227	hsa_circ_0030067	http://www.circbase.org/cgi-bin/singlerecord.cgi?id=hsa_circ_0030067
hsa_circ:chr13:41892942-41910892	NAA16	0	4.78856	0	0	-3.61557	0.453691	hsa_circ_0030069	http://www.circbase.org/cgi-bin/singlerecord.cgi?id=hsa_circ_0030069
hsa_circ:chr13:41932440-41936295	NAA16	0	3.19238	0	0	-3.03348	0.531288	hsa_circ_0030071	http://www.circbase.org/cgi-bin/singlerecord.cgi?id=hsa_circ_0030071
hsa_circ:chr13:42295506-42306291	VWA8	0	3.19238	0	0	-3.03348	0.531288	hsa_circ_0030096	http://www.circbase.org/cgi-bin/singlerecord.cgi?id=hsa_circ_0030096
hsa_circ:chr13:42385361-42393522	VWA8	22.2021	37.5104	0	39.8606	-0.585559	0.8266	hsa_circ_0004711	http://www.circbase.org/cgi-bin/singlerecord.cgi?id=hsa_circ_0004711
hsa_circ:chr13:42385361-42407667	VWA8	0	7.98094	10.6695	11.7237	1.47639	0.562262	hsa_circ_0006049	http://www.circbase.org/cgi-bin/singlerecord.cgi?id=hsa_circ_0006049
hsa_circ:chr13:42439872-42442613	VWA8	32.2939	55.0685	57.2276	60.9633	0.43085	0.49142	hsa_circ_0000478	http://www.circbase.org/cgi-bin/singlerecord.cgi?id=hsa_circ_0000478
hsa_circ:chr13:42439872-42461497	VWA8	0	7.98094	9.69959	8.20659	1.15616	0.677388	hsa_circ_0030117	http://www.circbase.org/cgi-bin/singlerecord.cgi?id=hsa_circ_0030117
hsa_circ:chr13:42481722-42486304	VWA8	0	19.1543	4.84979	25.7922	0.671148	0.798761	hsa_circ_0030122	http://www.circbase.org/cgi-bin/singlerecord.cgi?id=hsa_circ_0030122
hsa_circ:chr13:42733402-42734272	DGKH	5.04592	0	0	0	-3.67914	0.445627	hsa_circ_0030130	http://www.circbase.org/cgi-bin/singlerecord.cgi?id=hsa_circ_0030130
hsa_circ:chr13:45725822-45781640	GTF2F2	32.2939	18.3562	0	29.3093	-0.791788	0.758222	hsa_circ_0007259	http://www.circbase.org/cgi-bin/singlerecord.cgi?id=hsa_circ_0007259
hsa_circ:chr13:45975218-45985615	SLC25A30	0	4.78856	0	0	-3.61557	0.453691	NA	NA
hsa_circ:chr13:46090278-46099186	COG3	0	5.58666	6.78971	0	0.280139	0.948945	hsa_circ_0008937	http://www.circbase.org/cgi-bin/singlerecord.cgi?id=hsa_circ_0008937
hsa_circ:chr13:46584483-46594692	ZC3H13	17.1561	0	0	0	-5.44872	0.255936	NA	NA
hsa_circ:chr13:46616299-46619651	ZC3H13	0	0	0	7.03422	4.409	0.360117	NA	NA
hsa_circ:chr13:47224336-47243291	LRCH1	0	7.98094	0	0	-4.35014	0.36571	hsa_circ_0030200	http://www.circbase.org/cgi-bin/singlerecord.cgi?id=hsa_circ_0030200
hsa_circ:chr13:47266671-47275342	LRCH1	0	0	0	7.03422	4.409	0.360117	NA	NA
hsa_circ:chr13:47269028-47275342	LRCH1	8.07348	0	6.78971	0	-0.240064	0.953853	NA	NA
hsa_circ:chr13:47297356-47303119	LRCH1	0	21.5485	9.69959	0	-1.15	0.802447	hsa_circ_0030214	http://www.circbase.org/cgi-bin/singlerecord.cgi?id=hsa_circ_0030214
hsa_circ:chr13:47297356-47308133	LRCH1	92.845	193.139	166.833	150.063	0.14556	0.778555	hsa_circ_0002215	http://www.circbase.org/cgi-bin/singlerecord.cgi?id=hsa_circ_0002215
hsa_circ:chr13:49712883-49720071	FNDC3A	11.101	21.5485	17.4593	7.03422	-0.412761	0.777581	hsa_circ_0000481	http://www.circbase.org/cgi-bin/singlerecord.cgi?id=hsa_circ_0000481
hsa_circ:chr13:49741380-49749677	FNDC3A	0	0	0	18.7579	5.82651	0.224528	hsa_circ_0004024	http://www.circbase.org/cgi-bin/singlerecord.cgi?id=hsa_circ_0004024
hsa_circ:chr13:49742749-49752790	FNDC3A	9.08266	0	0	0	-4.52967	0.345973	hsa_circ_0006978	http://www.circbase.org/cgi-bin/singlerecord.cgi?id=hsa_circ_0006978
hsa_circ:chr13:49771013-49772710	FNDC3A	0	4.78856	0	0	-3.61557	0.453691	hsa_circ_0005263	http://www.circbase.org/cgi-bin/singlerecord.cgi?id=hsa_circ_0005263
hsa_circ:chr13:50025689-50026045	SETDB2,SETDB2-PHF11	2.01837	9.57713	14.5494	0	0.328166	0.907968	hsa_circ_0030253	http://www.circbase.org/cgi-bin/singlerecord.cgi?id=hsa_circ_0030253
hsa_circ:chr13:50279757-50280508	KPNA3	15.1378	5.58666	16.4893	0	-0.320431	0.890341	hsa_circ_0007232	http://www.circbase.org/cgi-bin/singlerecord.cgi?id=hsa_circ_0007232
hsa_circ:chr13:50296091-50296699	KPNA3	12.1102	0	0	0	-4.94551	0.30296	NA	NA
hsa_circ:chr13:52971367-52972329	THSD1	3.02755	0	0	0	-2.93848	0.544567	hsa_circ_0008776	http://www.circbase.org/cgi-bin/singlerecord.cgi?id=hsa_circ_0008776
hsa_circ:chr13:52992127-53000201	VPS36	10.0918	16.76	0	0	-6.09764	0.0478354	hsa_circ_0030340	http://www.circbase.org/cgi-bin/singlerecord.cgi?id=hsa_circ_0030340
hsa_circ:chr13:53007797-53009017	VPS36	2.01837	0	0	0	-2.34908	0.630393	NA	NA
hsa_circ:chr13:53196124-53201713	HNRNPA1L2,MRPS31P4	17.1561	0	0	0	-5.44872	0.255936	hsa_circ_0008868	http://www.circbase.org/cgi-bin/singlerecord.cgi?id=hsa_circ_0008868
hsa_circ:chr13:60348323-60385057	DIAPH3	13.1194	23.1447	24.249	39.8606	0.814473	0.401048	hsa_circ_0004878	http://www.circbase.org/cgi-bin/singlerecord.cgi?id=hsa_circ_0004878
hsa_circ:chr13:60384922-60413582	DIAPH3	0	12.7695	0	0	-5.02682	0.294991	NA	NA
hsa_circ:chr13:60407241-60413582	DIAPH3	0	7.98094	0	11.7237	0.548642	0.905235	hsa_circ_0030369	http://www.circbase.org/cgi-bin/singlerecord.cgi?id=hsa_circ_0030369
hsa_circ:chr13:60435541-60490383	DIAPH3	0	0	0	7.03422	4.409	0.360117	hsa_circ_0002592	http://www.circbase.org/cgi-bin/singlerecord.cgi?id=hsa_circ_0002592
hsa_circ:chr13:60582678-60616954	DIAPH3	0	8.77903	0	0	-4.48731	0.350567	hsa_circ_0007703	http://www.circbase.org/cgi-bin/singlerecord.cgi?id=hsa_circ_0007703
hsa_circ:chr13:60667762-60686320	DIAPH3	0	0	8.72963	0	4.72782	0.325779	hsa_circ_0030374	http://www.circbase.org/cgi-bin/singlerecord.cgi?id=hsa_circ_0030374
hsa_circ:chr13:61013822-61034674	TDRD3	11.101	24.7409	12.6095	21.1027	-0.0956097	0.938962	hsa_circ_0004245	http://www.circbase.org/cgi-bin/singlerecord.cgi?id=hsa_circ_0004245
hsa_circ:chr13:61013822-61041513	TDRD3	17.1561	26.3371	43.6482	17.5856	0.494817	0.608107	hsa_circ_0003441	http://www.circbase.org/cgi-bin/singlerecord.cgi?id=hsa_circ_0003441
hsa_circ:chr13:73482669-73505405	PIBF1	0	0	0	8.20659	4.63195	0.335868	hsa_circ_0030408	http://www.circbase.org/cgi-bin/singlerecord.cgi?id=hsa_circ_0030408
hsa_circ:chr13:75868990-75880607	TBC1D4	0	0	8.72963	0	4.72782	0.325779	NA	NA
hsa_circ:chr13:75876379-75880607	TBC1D4	23.2112	9.57713	4.84979	21.1027	-0.340224	0.818361	hsa_circ_0030421	http://www.circbase.org/cgi-bin/singlerecord.cgi?id=hsa_circ_0030421
hsa_circ:chr13:75900333-75901962	TBC1D4	0	0	5.81975	0	4.14443	0.390315	NA	NA
hsa_circ:chr13:75900333-75911176	TBC1D4	0	0	0	7.03422	4.409	0.360117	hsa_circ_0030425	http://www.circbase.org/cgi-bin/singlerecord.cgi?id=hsa_circ_0030425
hsa_circ:chr13:75900333-75923438	TBC1D4	25.2296	45.4913	0	18.7579	-1.92063	0.423847	hsa_circ_0002917	http://www.circbase.org/cgi-bin/singlerecord.cgi?id=hsa_circ_0002917
hsa_circ:chr13:75911057-75915723	TBC1D4	0	0	5.81975	0	4.14443	0.390315	NA	NA
hsa_circ:chr13:75911057-75933994	TBC1D4	0	8.77903	0	0	-4.48731	0.350567	NA	NA
hsa_circ:chr13:75923306-75933994	TBC1D4	38.349	0	18.4292	10.5513	-0.401123	0.883762	NA	NA
hsa_circ:chr13:75923306-75936743	TBC1D4	27.248	5.58666	0	23.4474	-0.48758	0.855943	hsa_circ_0030430	http://www.circbase.org/cgi-bin/singlerecord.cgi?id=hsa_circ_0030430
hsa_circ:chr13:75930283-75936743	TBC1D4	28.2572	7.18284	0	8.20659	-2.12415	0.313088	NA	NA
hsa_circ:chr13:75936162-75936743	TBC1D4	3.02755	7.18284	0	0	-4.70322	0.293586	hsa_circ_0030431	http://www.circbase.org/cgi-bin/singlerecord.cgi?id=hsa_circ_0030431
hsa_circ:chr13:76134889-76143643	ENSG00000261553.1,UCHL3	32.2939	44.6933	0	50.4119	-0.612619	0.822606	hsa_circ_0000494	http://www.circbase.org/cgi-bin/singlerecord.cgi?id=hsa_circ_0000494
hsa_circ:chr13:76134889-76169126	ENSG00000261553.1,UCHL3	0	11.9714	0	0	-4.93386	0.304114	hsa_circ_0003455	http://www.circbase.org/cgi-bin/singlerecord.cgi?id=hsa_circ_0003455
hsa_circ:chr13:76140831-76143643	ENSG00000261553.1,UCHL3	4.03674	5.58666	0	0	-4.61699	0.303974	NA	NA
hsa_circ:chr13:76195899-76301234	ENSG00000261553.1,LMO7	0	12.7695	0	0	-5.02682	0.294991	NA	NA
hsa_circ:chr13:76195899-76335174	ENSG00000261553.1,LMO7	0	4.78856	0	4.68948	-0.0429051	0.992446	NA	NA
hsa_circ:chr13:77791975-77818086	MYCBP2	13.1194	15.9619	5.81975	0	-2.30382	0.326009	hsa_circ_0004217	http://www.circbase.org/cgi-bin/singlerecord.cgi?id=hsa_circ_0004217
hsa_circ:chr13:77817194-77818086	MYCBP2	0	0	0	10.5513	4.99527	0.298708	hsa_circ_0030522	http://www.circbase.org/cgi-bin/singlerecord.cgi?id=hsa_circ_0030522
hsa_circ:chr13:78293667-78320990	SLAIN1	9.08266	0	0	0	-4.52967	0.345973	NA	NA
hsa_circ:chr13:78293667-78327493	SLAIN1	0	16.76	4.84979	9.37896	-0.243924	0.924645	hsa_circ_0000497	http://www.circbase.org/cgi-bin/singlerecord.cgi?id=hsa_circ_0000497
hsa_circ:chr13:79928574-79933821	RBM26	0	2.39428	0	0	-2.6212	0.590064	NA	NA
hsa_circ:chr13:79942865-79946065	RBM26	10.0918	0	0	0	-4.682	0.329779	hsa_circ_0030541	http://www.circbase.org/cgi-bin/singlerecord.cgi?id=hsa_circ_0030541
hsa_circ:chr13:79945080-79946065	RBM26	0	13.5676	7.75967	22.275	1.1364	0.629064	hsa_circ_0004205	http://www.circbase.org/cgi-bin/singlerecord.cgi?id=hsa_circ_0004205
hsa_circ:chr13:80094945-80107591	NDFIP2	8.07348	0	0	0	-4.35935	0.364681	hsa_circ_0030547	http://www.circbase.org/cgi-bin/singlerecord.cgi?id=hsa_circ_0030547
hsa_circ:chr13:88099351-88125808	ENSG00000232636.2,MIR4500HG	0	0	0	8.20659	4.63195	0.335868	NA	NA
hsa_circ:chr13:95686859-95705438	ABCC4	0	3.19238	12.6095	0	1.97304	0.624554	hsa_circ_0030567	http://www.circbase.org/cgi-bin/singlerecord.cgi?id=hsa_circ_0030567
hsa_circ:chr13:95695936-95715113	ABCC4	0	0	3.87984	0	3.56175	0.462171	NA	NA
hsa_circ:chr13:95768176-95840796	ABCC4	8.07348	0	4.84979	18.7579	1.5576	0.540648	hsa_circ_0030582	http://www.circbase.org/cgi-bin/singlerecord.cgi?id=hsa_circ_0030582
hsa_circ:chr13:95813443-95818621	ABCC4	0	8.77903	0	0	-4.48731	0.350567	hsa_circ_0007470	http://www.circbase.org/cgi-bin/singlerecord.cgi?id=hsa_circ_0007470
hsa_circ:chr13:95813443-95822882	ABCC4	10.0918	13.5676	15.5193	10.5513	0.140209	0.929594	hsa_circ_0006659	http://www.circbase.org/cgi-bin/singlerecord.cgi?id=hsa_circ_0006659
hsa_circ:chr13:95813443-95840796	ABCC4	27.248	7.18284	19.3992	16.4132	0.0643479	0.959621	hsa_circ_0030586	http://www.circbase.org/cgi-bin/singlerecord.cgi?id=hsa_circ_0030586
hsa_circ:chr13:95822786-95840796	ABCC4	0	14.3657	4.84979	0	-1.56271	0.727527	hsa_circ_0030594	http://www.circbase.org/cgi-bin/singlerecord.cgi?id=hsa_circ_0030594
hsa_circ:chr13:95829961-95839146	ABCC4	0	3.19238	0	9.37896	1.54124	0.724655	hsa_circ_0030596	http://www.circbase.org/cgi-bin/singlerecord.cgi?id=hsa_circ_0030596
hsa_circ:chr13:95829961-95840796	ABCC4	11.101	28.7314	12.6095	14.0684	-0.583303	0.652114	hsa_circ_0006871	http://www.circbase.org/cgi-bin/singlerecord.cgi?id=hsa_circ_0006871
hsa_circ:chr13:95858786-95863035	ABCC4	9.08266	11.1733	0	11.7237	-0.797645	0.74995	hsa_circ_0006318	http://www.circbase.org/cgi-bin/singlerecord.cgi?id=hsa_circ_0006318
hsa_circ:chr13:95858786-95887088	ABCC4	0	0	0	7.03422	4.409	0.360117	hsa_circ_0007282	http://www.circbase.org/cgi-bin/singlerecord.cgi?id=hsa_circ_0007282
hsa_circ:chr13:96409898-96416207	DNAJC3	0	0	0	12.8961	5.28526	0.271134	NA	NA
hsa_circ:chr13:96485181-96489456	UGGT2	16.147	20.7504	45.5881	11.7237	0.639008	0.548039	hsa_circ_0008274	http://www.circbase.org/cgi-bin/singlerecord.cgi?id=hsa_circ_0008274
hsa_circ:chr13:96622366-96651561	UGGT2	0	0	0	9.37896	4.82502	0.315758	NA	NA
hsa_circ:chr13:96636058-96651561	UGGT2	0	0	0	11.7237	5.14754	0.284	hsa_circ_0030632	http://www.circbase.org/cgi-bin/singlerecord.cgi?id=hsa_circ_0030632
hsa_circ:chr13:98645146-98652899	IPO5	12.1102	10.3752	0	0	-5.84058	0.0811298	hsa_circ_0030670	http://www.circbase.org/cgi-bin/singlerecord.cgi?id=hsa_circ_0030670
hsa_circ:chr13:98654721-98655291	IPO5	0	0	0	3.51711	3.40518	0.482694	hsa_circ_0030676	http://www.circbase.org/cgi-bin/singlerecord.cgi?id=hsa_circ_0030676
hsa_circ:chr13:99109422-99118815	STK24	27.248	0	19.3992	25.7922	0.733069	0.777848	hsa_circ_0030704	http://www.circbase.org/cgi-bin/singlerecord.cgi?id=hsa_circ_0030704
hsa_circ:chr13:99171497-99171727	STK24	5.04592	0	0	3.51711	-0.522806	0.909102	NA	NA
hsa_circ:chr13:99890681-99896878	UBAC2	26.2388	0	31.0387	30.4816	1.23302	0.631743	hsa_circ_0030720	http://www.circbase.org/cgi-bin/singlerecord.cgi?id=hsa_circ_0030720
hsa_circ:chr13:99896086-99896878	UBAC2	0	11.9714	0	0	-4.93386	0.304114	hsa_circ_0030722	http://www.circbase.org/cgi-bin/singlerecord.cgi?id=hsa_circ_0030722
hsa_circ:chr14:100728641-100742985	YY1	0	3.19238	0	0	-3.03348	0.531288	NA	NA
hsa_circ:chr14:100808735-100813183	WARS	8.07348	0	0	0	-4.35935	0.364681	NA	NA
hsa_circ:chr14:100992207-100995545	WDR25	0	0	12.6095	0	5.25734	0.273709	NA	NA
hsa_circ:chr14:102368056-102372866	PPP2R5C	18.1653	3.99047	10.6695	0	-1.04225	0.675831	hsa_circ_0003831	http://www.circbase.org/cgi-bin/singlerecord.cgi?id=hsa_circ_0003831
hsa_circ:chr14:102449356-102449946	DYNC1H1	0	7.18284	0	0	-4.19854	0.382922	hsa_circ_0002060	http://www.circbase.org/cgi-bin/singlerecord.cgi?id=hsa_circ_0002060
hsa_circ:chr14:102457864-102461637	DYNC1H1	0	6.38475	0	0	-4.02912	0.402745	NA	NA
hsa_circ:chr14:102468874-102469302	DYNC1H1	8.07348	0	9.69959	0	0.271419	0.95297	NA	NA
hsa_circ:chr14:102473345-102474674	DYNC1H1	3.02755	0	0	0	-2.93848	0.544567	NA	NA
hsa_circ:chr14:102486230-102489217	DYNC1H1	0	16.76	23.279	37.5159	1.85164	0.42587	hsa_circ_0008683	http://www.circbase.org/cgi-bin/singlerecord.cgi?id=hsa_circ_0008683
hsa_circ:chr14:102506573-102507010	DYNC1H1	370.371	367.123	349.185	362.263	-0.0520463	0.84166	hsa_circ_0002398	http://www.circbase.org/cgi-bin/singlerecord.cgi?id=hsa_circ_0002398
hsa_circ:chr14:102506573-102509085	DYNC1H1	19.1745	31.1257	9.69959	5.86185	-1.68917	0.196427	hsa_circ_0007979	http://www.circbase.org/cgi-bin/singlerecord.cgi?id=hsa_circ_0007979
hsa_circ:chr14:102659800-102661457	WDR20	28.2572	0	0	10.5513	-1.42277	0.75671	hsa_circ_0000569	http://www.circbase.org/cgi-bin/singlerecord.cgi?id=hsa_circ_0000569
hsa_circ:chr14:102661275-102664184	WDR20	0	18.3562	0	0	-5.54965	0.247158	hsa_circ_0003512	http://www.circbase.org/cgi-bin/singlerecord.cgi?id=hsa_circ_0003512
hsa_circ:chr14:102661275-102676199	WDR20	7.06429	17.5581	22.3091	0	-0.139696	0.954828	hsa_circ_0002553	http://www.circbase.org/cgi-bin/singlerecord.cgi?id=hsa_circ_0002553
hsa_circ:chr14:102792322-102793224	ZNF839	0	3.19238	0	0	-3.03348	0.531288	hsa_circ_0033403	http://www.circbase.org/cgi-bin/singlerecord.cgi?id=hsa_circ_0033403
hsa_circ:chr14:103148232-103173849	RCOR1	0	0	0	3.51711	3.40518	0.482694	NA	NA
hsa_circ:chr14:103180760-103187714	RCOR1	0	0	0	14.0684	5.41091	0.253109	hsa_circ_0006016	http://www.circbase.org/cgi-bin/singlerecord.cgi?id=hsa_circ_0006016
hsa_circ:chr14:103296671-103342862	TRAF3	6.05511	10.3752	7.75967	0	-1.07433	0.708725	hsa_circ_0033419	http://www.circbase.org/cgi-bin/singlerecord.cgi?id=hsa_circ_0033419
hsa_circ:chr14:103336522-103342862	TRAF3	12.1102	26.3371	19.3992	8.20659	-0.476446	0.717169	hsa_circ_0004166	http://www.circbase.org/cgi-bin/singlerecord.cgi?id=hsa_circ_0004166
hsa_circ:chr14:103336522-103369766	TRAF3	2.01837	0	5.81975	0	1.54738	0.737105	hsa_circ_0033426	http://www.circbase.org/cgi-bin/singlerecord.cgi?id=hsa_circ_0033426
hsa_circ:chr14:103355897-103369766	TRAF3	0	10.3752	0	0	-4.72779	0.325009	hsa_circ_0033431	http://www.circbase.org/cgi-bin/singlerecord.cgi?id=hsa_circ_0033431
hsa_circ:chr14:103429398-103430987	CDC42BPB	3.02755	7.18284	0	0	-4.70322	0.293586	NA	NA
hsa_circ:chr14:103432619-103433507	CDC42BPB	4.03674	0	0	0	-3.35581	0.487497	NA	NA
hsa_circ:chr14:103434590-103436598	CDC42BPB	41.3766	0	0	24.6198	-0.749379	0.869945	hsa_circ_0006809	http://www.circbase.org/cgi-bin/singlerecord.cgi?id=hsa_circ_0006809
hsa_circ:chr14:103440353-103444542	CDC42BPB	0	8.77903	0	0	-4.48731	0.350567	NA	NA
hsa_circ:chr14:103449893-103452917	CDC42BPB	0	3.99047	11.6395	0	1.53817	0.703921	NA	NA
hsa_circ:chr14:103465902-103478525	CDC42BPB	19.1745	19.9523	22.3091	14.0684	-0.102519	0.928798	hsa_circ_0005178	http://www.circbase.org/cgi-bin/singlerecord.cgi?id=hsa_circ_0005178
hsa_circ:chr14:103470265-103478525	CDC42BPB	89.8174	0	96.0259	92.6173	1.07142	0.716553	hsa_circ_0000571	http://www.circbase.org/cgi-bin/singlerecord.cgi?id=hsa_circ_0000571
hsa_circ:chr14:103803014-103806140	EIF5	0	3.19238	0	0	-3.03348	0.531288	hsa_circ_0033469	http://www.circbase.org/cgi-bin/singlerecord.cgi?id=hsa_circ_0033469
hsa_circ:chr14:103804664-103806140	EIF5	0	0	0	4.68948	3.8221	0.429169	NA	NA
hsa_circ:chr14:103871413-103894777	MARK3	0	9.57713	0	0	-4.61256	0.337098	hsa_circ_0033472	http://www.circbase.org/cgi-bin/singlerecord.cgi?id=hsa_circ_0033472
hsa_circ:chr14:103871413-103915304	MARK3	0	4.78856	0	0	-3.61557	0.453691	hsa_circ_0033473	http://www.circbase.org/cgi-bin/singlerecord.cgi?id=hsa_circ_0033473
hsa_circ:chr14:104120901-104124113	KLC1	0	3.19238	0	0	-3.03348	0.531288	NA	NA
hsa_circ:chr14:104128453-104129264	KLC1	35.3215	77.4151	46.558	52.7567	-0.188939	0.768324	hsa_circ_0033496	http://www.circbase.org/cgi-bin/singlerecord.cgi?id=hsa_circ_0033496
hsa_circ:chr14:104135848-104139768	KLC1	0	17.5581	0	0	-5.4856	0.252703	hsa_circ_0007737	http://www.circbase.org/cgi-bin/singlerecord.cgi?id=hsa_circ_0007737
hsa_circ:chr14:104219337-104220581	PPP1R13B	14.1286	27.1352	2.90988	9.37896	-1.75966	0.263298	hsa_circ_0000572	http://www.circbase.org/cgi-bin/singlerecord.cgi?id=hsa_circ_0000572
hsa_circ:chr14:104245082-104263855	PPP1R13B	75.6889	86.9922	98.9358	83.2383	0.163342	0.723407	hsa_circ_0005791	http://www.circbase.org/cgi-bin/singlerecord.cgi?id=hsa_circ_0005791
hsa_circ:chr14:105179544-105179943	INF2	6.05511	0	0	0	-3.94312	0.413042	NA	NA
hsa_circ:chr14:105241989-105259059	AKT1	7.06429	0	11.6395	0	0.727096	0.874731	NA	NA
hsa_circ:chr14:105692406-105693097	BRF1	59.5419	0	39.7683	67.9975	0.857058	0.764132	hsa_circ_0006153	http://www.circbase.org/cgi-bin/singlerecord.cgi?id=hsa_circ_0006153
hsa_circ:chr14:105692406-105707751	BRF1	13.1194	0	0	0	-5.06117	0.291667	hsa_circ_0008754	http://www.circbase.org/cgi-bin/singlerecord.cgi?id=hsa_circ_0008754
hsa_circ:chr14:105718844-105739231	BRF1	47.4317	18.3562	46.558	24.6198	0.123297	0.883944	hsa_circ_0005309	http://www.circbase.org/cgi-bin/singlerecord.cgi?id=hsa_circ_0005309
hsa_circ:chr14:105718844-105752713	BRF1	11.101	5.58666	0	0	-5.40964	0.163647	hsa_circ_0008538	http://www.circbase.org/cgi-bin/singlerecord.cgi?id=hsa_circ_0008538
hsa_circ:chr14:105814830-105821514	PACS2	0	19.1543	28.1288	22.275	1.3903	0.55685	hsa_circ_0033596	http://www.circbase.org/cgi-bin/singlerecord.cgi?id=hsa_circ_0033596
hsa_circ:chr14:105905009-105920647	MTA1	0	0	7.75967	0	4.55829	0.343757	NA	NA
hsa_circ:chr14:105911755-105916521	MTA1	0	0	9.69959	0	4.8795	0.310232	hsa_circ_0033612	http://www.circbase.org/cgi-bin/singlerecord.cgi?id=hsa_circ_0033612
hsa_circ:chr14:105911755-105916661	MTA1	3.02755	0	0	0	-2.93848	0.544567	hsa_circ_0033613	http://www.circbase.org/cgi-bin/singlerecord.cgi?id=hsa_circ_0033613
hsa_circ:chr14:105911755-105920647	MTA1	6.05511	0	0	14.0684	1.21909	0.791584	hsa_circ_0033614	http://www.circbase.org/cgi-bin/singlerecord.cgi?id=hsa_circ_0033614
hsa_circ:chr14:105920530-105927290	MTA1	5.04592	0	0	0	-3.67914	0.445627	hsa_circ_0033617	http://www.circbase.org/cgi-bin/singlerecord.cgi?id=hsa_circ_0033617
hsa_circ:chr14:20793698-20797532	CCNB1IP1	9.08266	0	5.81975	14.0684	1.13877	0.667997	hsa_circ_0004766	http://www.circbase.org/cgi-bin/singlerecord.cgi?id=hsa_circ_0004766
hsa_circ:chr14:20813091-20815072	PARP2	0	0	7.75967	11.7237	5.88228	0.101127	hsa_circ_0031104	http://www.circbase.org/cgi-bin/singlerecord.cgi?id=hsa_circ_0031104
hsa_circ:chr14:20853144-20854354	TEP1	0	0	4.84979	0	3.88232	0.42174	NA	NA
hsa_circ:chr14:20863609-20864108	TEP1	13.1194	0	0	37.5159	1.51732	0.740658	hsa_circ_0031113	http://www.circbase.org/cgi-bin/singlerecord.cgi?id=hsa_circ_0031113
hsa_circ:chr14:20863609-20864889	TEP1	7.06429	6.38475	0	0	-5.09915	0.229751	hsa_circ_0031114	http://www.circbase.org/cgi-bin/singlerecord.cgi?id=hsa_circ_0031114
hsa_circ:chr14:20871536-20874559	TEP1	0	17.5581	0	21.1027	0.262234	0.954394	hsa_circ_0005721	http://www.circbase.org/cgi-bin/singlerecord.cgi?id=hsa_circ_0005721
hsa_circ:chr14:21464368-21464870	LOC101929718,METTL17	0	0	2.90988	0	3.1489	0.517345	hsa_circ_0031132	http://www.circbase.org/cgi-bin/singlerecord.cgi?id=hsa_circ_0031132
hsa_circ:chr14:21698478-21702388	HNRNPC	163.488	153.234	113.485	146.546	-0.286193	0.437566	hsa_circ_0003643	http://www.circbase.org/cgi-bin/singlerecord.cgi?id=hsa_circ_0003643
hsa_circ:chr14:21825356-21829372	SUPT16H	9.08266	7.18284	18.4292	16.4132	1.1013	0.478622	hsa_circ_0000522	http://www.circbase.org/cgi-bin/singlerecord.cgi?id=hsa_circ_0000522
hsa_circ:chr14:21840033-21841589	SUPT16H	0	2.39428	12.6095	0	2.38499	0.564036	hsa_circ_0007497	http://www.circbase.org/cgi-bin/singlerecord.cgi?id=hsa_circ_0007497
hsa_circ:chr14:21870116-21871822	CHD8	29.2664	18.3562	22.3091	24.6198	-0.0186472	0.984916	hsa_circ_0031191	http://www.circbase.org/cgi-bin/singlerecord.cgi?id=hsa_circ_0031191
hsa_circ:chr14:21883733-21897494	CHD8	0	0	4.84979	0	3.88232	0.42174	hsa_circ_0031194	http://www.circbase.org/cgi-bin/singlerecord.cgi?id=hsa_circ_0031194
hsa_circ:chr14:21968637-21970045	METTL3	11.101	12.7695	0	0	-5.92728	0.0686892	hsa_circ_0005957	http://www.circbase.org/cgi-bin/singlerecord.cgi?id=hsa_circ_0005957
hsa_circ:chr14:21971316-21972024	METTL3	72.6613	76.617	123.185	110.203	0.644916	0.139039	hsa_circ_0000523	http://www.circbase.org/cgi-bin/singlerecord.cgi?id=hsa_circ_0000523
hsa_circ:chr14:23375404-23378804	RBM23	0	19.1543	0	0	-5.61098	0.241929	hsa_circ_0004137	http://www.circbase.org/cgi-bin/singlerecord.cgi?id=hsa_circ_0004137
hsa_circ:chr14:23375404-23380612	RBM23	37.3398	33.5199	46.558	29.3093	0.102564	0.891525	hsa_circ_0031241	http://www.circbase.org/cgi-bin/singlerecord.cgi?id=hsa_circ_0031241
hsa_circ:chr14:23378692-23380612	RBM23	36.3306	0	68.8671	90.2725	2.13338	0.426542	hsa_circ_0000524	http://www.circbase.org/cgi-bin/singlerecord.cgi?id=hsa_circ_0000524
hsa_circ:chr14:23395342-23396023	PRMT5	0	25.539	0	35.1711	0.459709	0.919997	hsa_circ_0031250	http://www.circbase.org/cgi-bin/singlerecord.cgi?id=hsa_circ_0031250
hsa_circ:chr14:23395342-23396869	PRMT5	27.248	31.1257	27.1588	0	-1.10028	0.651917	hsa_circ_0002928	http://www.circbase.org/cgi-bin/singlerecord.cgi?id=hsa_circ_0002928
hsa_circ:chr14:23416380-23417222	HAUS4	0	7.98094	11.6395	7.03422	1.21716	0.656996	hsa_circ_0031255	http://www.circbase.org/cgi-bin/singlerecord.cgi?id=hsa_circ_0031255
hsa_circ:chr14:23416810-23417222	HAUS4	0	0	0	15.2408	5.5266	0.249579	NA	NA
hsa_circ:chr14:23419523-23421892	HAUS4	6.05511	38.3085	21.3391	23.4474	0.00527169	0.99632	hsa_circ_0005663	http://www.circbase.org/cgi-bin/singlerecord.cgi?id=hsa_circ_0005663
hsa_circ:chr14:23465157-23468365	C14orf93	0	7.18284	0	0	-4.19854	0.382922	hsa_circ_0031266	http://www.circbase.org/cgi-bin/singlerecord.cgi?id=hsa_circ_0031266
hsa_circ:chr14:23502577-23502883	PSMB5	91.8358	70.2323	48.4979	82.0659	-0.314154	0.552398	hsa_circ_0008758	http://www.circbase.org/cgi-bin/singlerecord.cgi?id=hsa_circ_0008758
hsa_circ:chr14:23530293-23530831	ACIN1	10.0918	0	7.75967	0	-0.372438	0.935513	NA	NA
hsa_circ:chr14:23550957-23559842	ACIN1	6.05511	0	0	0	-3.94312	0.413042	NA	NA
hsa_circ:chr14:24624623-24626613	RNF31	0	0	0	5.86185	4.14518	0.390227	NA	NA
hsa_circ:chr14:24679554-24679974	CHMP4A,ENSG00000260669.2	0	0	0	4.68948	3.8221	0.429169	hsa_circ_0007326	http://www.circbase.org/cgi-bin/singlerecord.cgi?id=hsa_circ_0007326
hsa_circ:chr14:24679554-24681035	CHMP4A,ENSG00000260669.2	0	3.99047	0	0	-3.3537	0.487777	hsa_circ_0031357	http://www.circbase.org/cgi-bin/singlerecord.cgi?id=hsa_circ_0031357
hsa_circ:chr14:24680621-24681035	CHMP4A,ENSG00000260669.2	18.1653	5.58666	0	0	-5.91827	0.071979	hsa_circ_0031359	http://www.circbase.org/cgi-bin/singlerecord.cgi?id=hsa_circ_0031359
hsa_circ:chr14:24735636-24737825	RABGGTA	0	30.3276	9.69959	0	-1.64262	0.720669	hsa_circ_0007750	http://www.circbase.org/cgi-bin/singlerecord.cgi?id=hsa_circ_0007750
hsa_circ:chr14:25443871-25444056	STXBP6	4.03674	0	0	0	-3.35581	0.487497	hsa_circ_0031408	http://www.circbase.org/cgi-bin/singlerecord.cgi?id=hsa_circ_0031408
hsa_circ:chr14:25443871-25479846	STXBP6	2.01837	5.58666	0	0	-4.27886	0.350689	hsa_circ_0006038	http://www.circbase.org/cgi-bin/singlerecord.cgi?id=hsa_circ_0006038
hsa_circ:chr14:31066626-31071337	G2E3	0	0	4.84979	0	3.88232	0.42174	NA	NA
hsa_circ:chr14:31067689-31071337	G2E3	0	0	2.90988	0	3.1489	0.517345	NA	NA
hsa_circ:chr14:31139462-31144271	SCFD1	31.2847	0	15.5193	0	-1.00851	0.825879	hsa_circ_0009140	http://www.circbase.org/cgi-bin/singlerecord.cgi?id=hsa_circ_0009140
hsa_circ:chr14:31388172-31398517	STRN3	4.03674	0	0	0	-3.35581	0.487497	NA	NA
hsa_circ:chr14:31416296-31420150	STRN3	0	5.58666	0	0	-3.83712	0.425951	NA	NA
hsa_circ:chr14:31424826-31425448	STRN3	0	0	0	8.20659	4.63195	0.335868	hsa_circ_0007656	http://www.circbase.org/cgi-bin/singlerecord.cgi?id=hsa_circ_0007656
hsa_circ:chr14:31535332-31542179	AP4S1	17.1561	11.1733	25.2189	16.4132	0.560626	0.646322	hsa_circ_0031449	http://www.circbase.org/cgi-bin/singlerecord.cgi?id=hsa_circ_0031449
hsa_circ:chr14:31596991-31602881	HECTD1	0	9.57713	0	0	-4.61256	0.337098	hsa_circ_0002301	http://www.circbase.org/cgi-bin/singlerecord.cgi?id=hsa_circ_0002301
hsa_circ:chr14:31602444-31602881	HECTD1	0	0	11.6395	16.4132	6.40826	0.0336004	hsa_circ_0031485	http://www.circbase.org/cgi-bin/singlerecord.cgi?id=hsa_circ_0031485
hsa_circ:chr14:31619205-31619427	HECTD1	7.06429	0	0	0	-4.16619	0.386659	NA	NA
hsa_circ:chr14:31637504-31638674	HECTD1	0	15.1638	3.87984	17.5856	0.490864	0.836486	NA	NA
hsa_circ:chr14:31771501-31776085	ENSG00000257831.1,HEATR5A	0	4.78856	0	0	-3.61557	0.453691	hsa_circ_0002155	http://www.circbase.org/cgi-bin/singlerecord.cgi?id=hsa_circ_0002155
hsa_circ:chr14:31777099-31785155	HEATR5A	0	4.78856	0	0	-3.61557	0.453691	hsa_circ_0031521	http://www.circbase.org/cgi-bin/singlerecord.cgi?id=hsa_circ_0031521
hsa_circ:chr14:34398282-34400421	EGLN3	15.1378	5.58666	0	0	-5.72177	0.101497	hsa_circ_0031594	http://www.circbase.org/cgi-bin/singlerecord.cgi?id=hsa_circ_0031594
hsa_circ:chr14:35036892-35037219	SNX6	0	27.9333	5.81975	17.5856	-0.260251	0.921542	NA	NA
hsa_circ:chr14:35044962-35078948	SNX6	0	7.18284	0	7.03422	-0.0399641	0.99244	hsa_circ_0031607	http://www.circbase.org/cgi-bin/singlerecord.cgi?id=hsa_circ_0031607
hsa_circ:chr14:35055436-35078948	SNX6	6.05511	0	0	0	-3.94312	0.413042	hsa_circ_0031608	http://www.circbase.org/cgi-bin/singlerecord.cgi?id=hsa_circ_0031608
hsa_circ:chr14:35261981-35264971	BAZ1A	7.06429	0	0	0	-4.16619	0.386659	hsa_circ_0004047	http://www.circbase.org/cgi-bin/singlerecord.cgi?id=hsa_circ_0004047
hsa_circ:chr14:35269430-35272194	BAZ1A	0	6.38475	0	14.0684	1.13309	0.805902	NA	NA
hsa_circ:chr14:35276657-35295362	BAZ1A	2.01837	0	0	0	-2.34908	0.630393	hsa_circ_0031638	http://www.circbase.org/cgi-bin/singlerecord.cgi?id=hsa_circ_0031638
hsa_circ:chr14:35331250-35331528	BAZ1A	75.6889	47.0875	90.2062	72.687	0.413639	0.43368	hsa_circ_0006137	http://www.circbase.org/cgi-bin/singlerecord.cgi?id=hsa_circ_0006137
hsa_circ:chr14:35482552-35488280	SRP54	2.01837	0	0	0	-2.34908	0.630393	NA	NA
hsa_circ:chr14:35515711-35522657	FAM177A1	7.06429	0	0	0	-4.16619	0.386659	NA	NA
hsa_circ:chr14:35522484-35522657	FAM177A1	13.1194	0	0	0	-5.06117	0.291667	NA	NA
hsa_circ:chr14:35522484-35548230	FAM177A1	0	7.18284	0	0	-4.19854	0.382922	hsa_circ_0031651	http://www.circbase.org/cgi-bin/singlerecord.cgi?id=hsa_circ_0031651
hsa_circ:chr14:37736143-37739730	MIPOL1	0	0	0	10.5513	4.99527	0.298708	NA	NA
hsa_circ:chr14:37754523-37777724	MIPOL1	9.08266	2.39428	0	0	-4.86871	0.271346	hsa_circ_0004455	http://www.circbase.org/cgi-bin/singlerecord.cgi?id=hsa_circ_0004455
hsa_circ:chr14:39517856-39524500	SEC23A	0	6.38475	5.81975	0	-0.133435	0.975742	hsa_circ_0003374	http://www.circbase.org/cgi-bin/singlerecord.cgi?id=hsa_circ_0003374
hsa_circ:chr14:39565102-39565343	SEC23A	0	0	3.87984	0	3.56175	0.462171	hsa_circ_0031732	http://www.circbase.org/cgi-bin/singlerecord.cgi?id=hsa_circ_0031732
hsa_circ:chr14:39620950-39628754	TRAPPC6B	0	0	0	15.2408	5.5266	0.249579	hsa_circ_0031738	http://www.circbase.org/cgi-bin/singlerecord.cgi?id=hsa_circ_0031738
hsa_circ:chr14:39623415-39627606	TRAPPC6B	0	1.59619	0	0	-2.0415	0.676651	hsa_circ_0005836	http://www.circbase.org/cgi-bin/singlerecord.cgi?id=hsa_circ_0005836
hsa_circ:chr14:39627489-39628754	TRAPPC6B	0	7.98094	0	0	-4.35014	0.36571	hsa_circ_0002395	http://www.circbase.org/cgi-bin/singlerecord.cgi?id=hsa_circ_0002395
hsa_circ:chr14:39646616-39647120	PNN	0	0	0	14.0684	5.41091	0.253109	NA	NA
hsa_circ:chr14:39648295-39648666	PNN	27.248	12.7695	31.0387	30.4816	0.626703	0.514337	NA	NA
hsa_circ:chr14:39746138-39748741	MIA2	152.387	114.127	120.275	112.548	-0.192194	0.625761	hsa_circ_0000530	http://www.circbase.org/cgi-bin/singlerecord.cgi?id=hsa_circ_0000530
hsa_circ:chr14:39746138-39764233	MIA2	0	0	13.5794	0	5.36411	0.261852	hsa_circ_0002835	http://www.circbase.org/cgi-bin/singlerecord.cgi?id=hsa_circ_0002835
hsa_circ:chr14:39746138-39777791	MIA2	0	0	0	4.68948	3.8221	0.429169	NA	NA
hsa_circ:chr14:39782544-39796226	MIA2	0	11.9714	0	0	-4.93386	0.304114	hsa_circ_0031749	http://www.circbase.org/cgi-bin/singlerecord.cgi?id=hsa_circ_0031749
hsa_circ:chr14:45515748-45523752	FAM179B	0	3.19238	0	0	-3.03348	0.531288	NA	NA
hsa_circ:chr14:45623900-45628483	FANCM	14.1286	0	0	0	-5.16819	0.275043	NA	NA
hsa_circ:chr14:45686222-45687657	MIS18BP1	0	0	0	11.7237	5.14754	0.284	NA	NA
hsa_circ:chr14:50136242-50141145	POLE2	0	0	11.6395	0	5.14205	0.284521	hsa_circ_0004904	http://www.circbase.org/cgi-bin/singlerecord.cgi?id=hsa_circ_0004904
hsa_circ:chr14:50298017-50301167	NEMF	0	0	2.90988	0	3.1489	0.517345	hsa_circ_0008076	http://www.circbase.org/cgi-bin/singlerecord.cgi?id=hsa_circ_0008076
hsa_circ:chr14:50298769-50301167	NEMF	6.05511	3.99047	0	0	-4.67764	0.295931	hsa_circ_0031814	http://www.circbase.org/cgi-bin/singlerecord.cgi?id=hsa_circ_0031814
hsa_circ:chr14:50616726-50616948	SOS2	0	19.1543	23.279	0	0.281062	0.951102	hsa_circ_0007695	http://www.circbase.org/cgi-bin/singlerecord.cgi?id=hsa_circ_0007695
hsa_circ:chr14:50616726-50619891	SOS2	2.01837	4.78856	0	0	-4.11884	0.370568	NA	NA
hsa_circ:chr14:50667671-50671127	SOS2	0	0	9.69959	0	4.8795	0.310232	hsa_circ_0031836	http://www.circbase.org/cgi-bin/singlerecord.cgi?id=hsa_circ_0031836
hsa_circ:chr14:50732076-50750751	L2HGDH	11.101	0	0	0	-4.81976	0.315569	hsa_circ_0031841	http://www.circbase.org/cgi-bin/singlerecord.cgi?id=hsa_circ_0031841
hsa_circ:chr14:50930770-50941867	MAP4K5	0	1.59619	0	0	-2.0415	0.676651	NA	NA
hsa_circ:chr14:51107468-51111732	SAV1	0	23.1447	18.4292	37.5159	1.26835	0.610188	hsa_circ_0007101	http://www.circbase.org/cgi-bin/singlerecord.cgi?id=hsa_circ_0007101
hsa_circ:chr14:51259430-51273536	NIN	0	0	6.78971	0	4.36615	0.364903	NA	NA
hsa_circ:chr14:51710574-51713938	TMX1	30.2755	44.6933	22.3091	15.2408	-0.995961	0.265765	hsa_circ_0031897	http://www.circbase.org/cgi-bin/singlerecord.cgi?id=hsa_circ_0031897
hsa_circ:chr14:51710574-51716483	TMX1	12.1102	0	20.3691	12.8961	1.4684	0.523277	hsa_circ_0009104	http://www.circbase.org/cgi-bin/singlerecord.cgi?id=hsa_circ_0009104
hsa_circ:chr14:53064990-53067059	GPR137C	0	0	5.81975	0	4.14443	0.390315	hsa_circ_0031941	http://www.circbase.org/cgi-bin/singlerecord.cgi?id=hsa_circ_0031941
hsa_circ:chr14:53118957-53120033	ERO1A	0	9.57713	0	0	-4.61256	0.337098	NA	NA
hsa_circ:chr14:54418571-54420118	BMP4	0	0	8.72963	0	4.72782	0.325779	NA	NA
hsa_circ:chr14:55241652-55243258	SAMD4A	11.101	0	0	0	-4.81976	0.315569	hsa_circ_0002012	http://www.circbase.org/cgi-bin/singlerecord.cgi?id=hsa_circ_0002012
hsa_circ:chr14:55423752-55448414	WDHD1	0	0	6.78971	0	4.36615	0.364903	NA	NA
hsa_circ:chr14:55433193-55434112	WDHD1	0	4.78856	9.69959	10.5513	2.06425	0.462976	hsa_circ_0006831	http://www.circbase.org/cgi-bin/singlerecord.cgi?id=hsa_circ_0006831
hsa_circ:chr14:55433193-55448414	WDHD1	0	9.57713	0	0	-4.61256	0.337098	NA	NA
hsa_circ:chr14:55451441-55454105	WDHD1	21.1929	0	0	0	-5.7539	0.230052	hsa_circ_0032009	http://www.circbase.org/cgi-bin/singlerecord.cgi?id=hsa_circ_0032009
hsa_circ:chr14:56133959-56137527	KTN1	0	6.38475	0	0	-4.02912	0.402745	NA	NA
hsa_circ:chr14:56746394-56757174	PELI2	7.06429	0	0	11.7237	0.732585	0.873791	hsa_circ_0000541	http://www.circbase.org/cgi-bin/singlerecord.cgi?id=hsa_circ_0000541
hsa_circ:chr14:57713429-57714430	EXOC5	15.1378	0	10.6695	0	-0.499945	0.913424	hsa_circ_0004399	http://www.circbase.org/cgi-bin/singlerecord.cgi?id=hsa_circ_0004399
hsa_circ:chr14:58718837-58724716	PSMA3	0	0	7.75967	10.5513	5.79289	0.117567	hsa_circ_0032068	http://www.circbase.org/cgi-bin/singlerecord.cgi?id=hsa_circ_0032068
hsa_circ:chr14:59954392-59965626	JKAMP	0	0	0	5.86185	4.14518	0.390227	hsa_circ_0032102	http://www.circbase.org/cgi-bin/singlerecord.cgi?id=hsa_circ_0032102
hsa_circ:chr14:60582437-60592541	PCNX4	0	8.77903	0	0	-4.48731	0.350567	hsa_circ_0000544	http://www.circbase.org/cgi-bin/singlerecord.cgi?id=hsa_circ_0000544
hsa_circ:chr14:61278705-61346553	ENSG00000258892.1,MNAT1	0	0	0	2.34474	2.81658	0.564129	hsa_circ_0008215	http://www.circbase.org/cgi-bin/singlerecord.cgi?id=hsa_circ_0008215
hsa_circ:chr14:62187100-62188541	HIF1A	9.08266	0	0	4.68948	-0.956791	0.823101	hsa_circ_0006393	http://www.circbase.org/cgi-bin/singlerecord.cgi?id=hsa_circ_0006393
hsa_circ:chr14:62187100-62194373	HIF1A	0	0	0	10.5513	4.99527	0.298708	hsa_circ_0004623	http://www.circbase.org/cgi-bin/singlerecord.cgi?id=hsa_circ_0004623
hsa_circ:chr14:62188227-62188541	HIF1A	10.0918	0	0	0	-4.682	0.329779	hsa_circ_0007976	http://www.circbase.org/cgi-bin/singlerecord.cgi?id=hsa_circ_0007976
hsa_circ:chr14:62193424-62194373	HIF1A	0	7.18284	0	0	-4.19854	0.382922	hsa_circ_0032136	http://www.circbase.org/cgi-bin/singlerecord.cgi?id=hsa_circ_0032136
hsa_circ:chr14:64574209-64580289	SYNE2	0	4.78856	0	0	-3.61557	0.453691	hsa_circ_0032164	http://www.circbase.org/cgi-bin/singlerecord.cgi?id=hsa_circ_0032164
hsa_circ:chr14:64600787-64604701	SYNE2	0	8.77903	0	0	-4.48731	0.350567	NA	NA
hsa_circ:chr14:64633951-64634357	SYNE2	0	4.78856	0	0	-3.61557	0.453691	NA	NA
hsa_circ:chr14:64678679-64688422	SYNE2	0	0	0	3.51711	3.40518	0.482694	NA	NA
hsa_circ:chr14:64884606-64886643	MTHFD1	4.03674	7.98094	0	18.7579	0.634977	0.807231	hsa_circ_0004760	http://www.circbase.org/cgi-bin/singlerecord.cgi?id=hsa_circ_0004760
hsa_circ:chr14:64884606-64891649	MTHFD1	5.04592	15.9619	9.69959	0	-1.10808	0.665276	hsa_circ_0032176	http://www.circbase.org/cgi-bin/singlerecord.cgi?id=hsa_circ_0032176
hsa_circ:chr14:64884606-64892910	MTHFD1	0	3.19238	0	0	-3.03348	0.531288	hsa_circ_0003686	http://www.circbase.org/cgi-bin/singlerecord.cgi?id=hsa_circ_0003686
hsa_circ:chr14:64894055-64906984	MTHFD1	0	3.19238	0	0	-3.03348	0.531288	NA	NA
hsa_circ:chr14:64898250-64908171	ENSG00000272909.1,MTHFD1	0	3.19238	0	0	-3.03348	0.531288	hsa_circ_0032190	http://www.circbase.org/cgi-bin/singlerecord.cgi?id=hsa_circ_0032190
hsa_circ:chr14:64908772-64915035	ENSG00000272909.1,MTHFD1;ENSG00000258824.2,MTHFD1	7.06429	14.3657	0	0	-5.77249	0.0926377	hsa_circ_0032201	http://www.circbase.org/cgi-bin/singlerecord.cgi?id=hsa_circ_0032201
hsa_circ:chr14:64908772-64916340	ENSG00000272909.1,MTHFD1;MTHFD1,ZBTB25	0	16.76	0	0	-5.41857	0.2586	hsa_circ_0032202	http://www.circbase.org/cgi-bin/singlerecord.cgi?id=hsa_circ_0032202
hsa_circ:chr14:64914935-64916340	ENSG00000258824.2,MTHFD1;MTHFD1,ZBTB25	0	7.98094	2.90988	0	-1.44956	0.746237	hsa_circ_0032205	http://www.circbase.org/cgi-bin/singlerecord.cgi?id=hsa_circ_0032205
hsa_circ:chr14:65499328-65511161	CHURC1-FNTB,FNTB	7.06429	0	0	0	-4.16619	0.386659	NA	NA
hsa_circ:chr14:65499328-65521407	CHURC1-FNTB,FNTB	0	0	3.87984	0	3.56175	0.462171	hsa_circ_0032238	http://www.circbase.org/cgi-bin/singlerecord.cgi?id=hsa_circ_0032238
hsa_circ:chr14:65922339-66028484	FUT8	14.1286	0	0	0	-5.16819	0.275043	hsa_circ_0001998	http://www.circbase.org/cgi-bin/singlerecord.cgi?id=hsa_circ_0001998
hsa_circ:chr14:66028055-66028484	FUT8	161.47	182.763	131.914	187.579	-0.111056	0.756474	hsa_circ_0003028	http://www.circbase.org/cgi-bin/singlerecord.cgi?id=hsa_circ_0003028
hsa_circ:chr14:66028055-66096324	FUT8	0	6.38475	0	0	-4.02912	0.402745	NA	NA
hsa_circ:chr14:66188493-66191041	FUT8	0	0	0	7.03422	4.409	0.360117	hsa_circ_0007163	http://www.circbase.org/cgi-bin/singlerecord.cgi?id=hsa_circ_0007163
hsa_circ:chr14:67768106-67770316	MPP5	0	9.57713	0	0	-4.61256	0.337098	hsa_circ_0005429	http://www.circbase.org/cgi-bin/singlerecord.cgi?id=hsa_circ_0005429
hsa_circ:chr14:67859043-67859958	PLEK2	16.147	0	0	7.03422	-1.20092	0.794451	NA	NA
hsa_circ:chr14:68151732-68157138	RDH11	4.03674	0	0	0	-3.35581	0.487497	hsa_circ_0006278	http://www.circbase.org/cgi-bin/singlerecord.cgi?id=hsa_circ_0006278
hsa_circ:chr14:68156929-68159769	RDH11	0	0	7.75967	0	4.55829	0.343757	hsa_circ_0005139	http://www.circbase.org/cgi-bin/singlerecord.cgi?id=hsa_circ_0005139
hsa_circ:chr14:68228083-68229536	ZFYVE26	0	0	15.5193	21.1027	6.79286	0.0102995	hsa_circ_0000545	http://www.circbase.org/cgi-bin/singlerecord.cgi?id=hsa_circ_0000545
hsa_circ:chr14:68228920-68236447	ZFYVE26	5.04592	0	0	0	-3.67914	0.445627	hsa_circ_0032289	http://www.circbase.org/cgi-bin/singlerecord.cgi?id=hsa_circ_0032289
hsa_circ:chr14:68234421-68236447	ZFYVE26	12.1102	7.98094	0	24.6198	0.290374	0.908119	hsa_circ_0000546	http://www.circbase.org/cgi-bin/singlerecord.cgi?id=hsa_circ_0000546
hsa_circ:chr14:68273262-68276006	ZFYVE26	0	10.3752	0	0	-4.72779	0.325009	NA	NA
hsa_circ:chr14:68352586-68353921	RAD51B	0	0	1.93992	0	2.56807	0.600374	NA	NA
hsa_circ:chr14:69349175-69349772	ACTN1	0	9.57713	0	0	-4.61256	0.337098	NA	NA
hsa_circ:chr14:69356856-69360464	ACTN1	28.2572	17.5581	0	7.03422	-2.72718	0.131927	hsa_circ_0002913	http://www.circbase.org/cgi-bin/singlerecord.cgi?id=hsa_circ_0002913
hsa_circ:chr14:69369194-69387842	ACTN1	9.08266	0	0	0	-4.52967	0.345973	NA	NA
hsa_circ:chr14:69387723-69392389	ACTN1	0	0	11.6395	0	5.14205	0.284521	hsa_circ_0007644	http://www.circbase.org/cgi-bin/singlerecord.cgi?id=hsa_circ_0007644
hsa_circ:chr14:69583083-69589077	DCAF5	32.2939	0	30.0687	23.4474	0.731711	0.782685	hsa_circ_0007392	http://www.circbase.org/cgi-bin/singlerecord.cgi?id=hsa_circ_0007392
hsa_circ:chr14:69695533-69697315	EXD2	0	0	2.90988	0	3.1489	0.517345	hsa_circ_0032336	http://www.circbase.org/cgi-bin/singlerecord.cgi?id=hsa_circ_0032336
hsa_circ:chr14:69919958-69922583	SLC39A9	0	0	0	7.03422	4.409	0.360117	hsa_circ_0032349	http://www.circbase.org/cgi-bin/singlerecord.cgi?id=hsa_circ_0032349
hsa_circ:chr14:69921529-69922583	SLC39A9	0	7.18284	0	0	-4.19854	0.382922	hsa_circ_0032350	http://www.circbase.org/cgi-bin/singlerecord.cgi?id=hsa_circ_0032350
hsa_circ:chr14:70170112-70171459	SUSD6	0	4.78856	4.84979	0	0.0179616	0.996826	hsa_circ_0032353	http://www.circbase.org/cgi-bin/singlerecord.cgi?id=hsa_circ_0032353
hsa_circ:chr14:70842393-70855323	SYNJ2BP,SYNJ2BP-COX16	0	0	13.5794	0	5.36411	0.261852	NA	NA
hsa_circ:chr14:71051534-71064494	ENSG00000259115.1,MED6	0	5.58666	0	0	-3.83712	0.425951	NA	NA
hsa_circ:chr14:71209068-71209308	MAP3K9	47.4317	31.9238	14.5494	0	-2.43848	0.262133	hsa_circ_0032377	http://www.circbase.org/cgi-bin/singlerecord.cgi?id=hsa_circ_0032377
hsa_circ:chr14:71209068-71216798	MAP3K9	5.04592	0	0	0	-3.67914	0.445627	NA	NA
hsa_circ:chr14:71215546-71216798	MAP3K9	0	31.9238	0	10.5513	-1.6008	0.727365	hsa_circ_0032379	http://www.circbase.org/cgi-bin/singlerecord.cgi?id=hsa_circ_0032379
hsa_circ:chr14:71413632-71429048	PCNX1	8.07348	0	0	0	-4.35935	0.364681	hsa_circ_0032383	http://www.circbase.org/cgi-bin/singlerecord.cgi?id=hsa_circ_0032383
hsa_circ:chr14:71455284-71462642	PCNX1	13.1194	19.1543	31.0387	26.9645	0.843025	0.40663	hsa_circ_0032406	http://www.circbase.org/cgi-bin/singlerecord.cgi?id=hsa_circ_0032406
hsa_circ:chr14:71492834-71502874	PCNX1	0	0	7.75967	24.6198	6.61411	0.0197868	hsa_circ_0007996	http://www.circbase.org/cgi-bin/singlerecord.cgi?id=hsa_circ_0007996
hsa_circ:chr14:71568707-71572157	PCNX1	0	7.18284	0	0	-4.19854	0.382922	NA	NA
hsa_circ:chr14:72125050-72139339	SIPA1L1	0	0	5.81975	0	4.14443	0.390315	hsa_circ_0032471	http://www.circbase.org/cgi-bin/singlerecord.cgi?id=hsa_circ_0032471
hsa_circ:chr14:73406510-73407085	DCAF4	0	0	0	11.7237	5.14754	0.284	hsa_circ_0032482	http://www.circbase.org/cgi-bin/singlerecord.cgi?id=hsa_circ_0032482
hsa_circ:chr14:73459851-73460065	ZFYVE1	35.3215	15.9619	26.1889	7.03422	-0.614931	0.592677	hsa_circ_0032491	http://www.circbase.org/cgi-bin/singlerecord.cgi?id=hsa_circ_0032491
hsa_circ:chr14:73459851-73465023	ZFYVE1	0	0	6.78971	0	4.36615	0.364903	hsa_circ_0032492	http://www.circbase.org/cgi-bin/singlerecord.cgi?id=hsa_circ_0032492
hsa_circ:chr14:73543027-73544244	RBM25	4.03674	6.38475	0	0	-4.73212	0.288696	hsa_circ_0032497	http://www.circbase.org/cgi-bin/singlerecord.cgi?id=hsa_circ_0032497
hsa_circ:chr14:73544077-73563808	RBM25	4.03674	0	0	0	-3.35581	0.487497	NA	NA
hsa_circ:chr14:73614503-73614802	PSEN1	46.4225	31.1257	23.279	37.5159	-0.352189	0.655753	hsa_circ_0008521	http://www.circbase.org/cgi-bin/singlerecord.cgi?id=hsa_circ_0008521
hsa_circ:chr14:73614503-73614814	PSEN1	31.2847	7.18284	28.1288	50.4119	1.0383	0.283445	hsa_circ_0003848	http://www.circbase.org/cgi-bin/singlerecord.cgi?id=hsa_circ_0003848
hsa_circ:chr14:73614503-73640415	PSEN1	21.1929	47.8856	24.249	21.1027	-0.610415	0.499257	hsa_circ_0002564	http://www.circbase.org/cgi-bin/singlerecord.cgi?id=hsa_circ_0002564
hsa_circ:chr14:73614503-73664837	PSEN1	0	11.1733	0	0	-4.8345	0.314073	hsa_circ_0002289	http://www.circbase.org/cgi-bin/singlerecord.cgi?id=hsa_circ_0002289
hsa_circ:chr14:73637505-73640415	PSEN1	11.101	0	0	0	-4.81976	0.315569	hsa_circ_0032506	http://www.circbase.org/cgi-bin/singlerecord.cgi?id=hsa_circ_0032506
hsa_circ:chr14:74203701-74204000	ELMSAN1	15.1378	16.76	16.4893	10.5513	-0.236326	0.864771	hsa_circ_0003121	http://www.circbase.org/cgi-bin/singlerecord.cgi?id=hsa_circ_0003121
hsa_circ:chr14:74358730-74376133	ZNF410	0	0	0	11.7237	5.14754	0.284	hsa_circ_0003448	http://www.circbase.org/cgi-bin/singlerecord.cgi?id=hsa_circ_0003448
hsa_circ:chr14:74358730-74390225	ZNF410	0	0	8.72963	0	4.72782	0.325779	NA	NA
hsa_circ:chr14:74360500-74370813	ZNF410	0	2.39428	0	0	-2.6212	0.590064	NA	NA
hsa_circ:chr14:74364774-74370813	ZNF410	0	0	1.93992	0	2.56807	0.600374	NA	NA
hsa_circ:chr14:74370663-74371786	ZNF410	0	0	0	14.0684	5.41091	0.253109	NA	NA
hsa_circ:chr14:74420138-74422631	COQ6	0	0	0	5.86185	4.14518	0.390227	hsa_circ_0032533	http://www.circbase.org/cgi-bin/singlerecord.cgi?id=hsa_circ_0032533
hsa_circ:chr14:75136352-75138186	AREL1	0	0	6.78971	0	4.36615	0.364903	hsa_circ_0005030	http://www.circbase.org/cgi-bin/singlerecord.cgi?id=hsa_circ_0005030
hsa_circ:chr14:75158744-75159031	AREL1	0	13.5676	0	0	-5.11415	0.285394	hsa_circ_0032621	http://www.circbase.org/cgi-bin/singlerecord.cgi?id=hsa_circ_0032621
hsa_circ:chr14:75245150-75245386	YLPM1	0	7.18284	0	0	-4.19854	0.382922	hsa_circ_0007964	http://www.circbase.org/cgi-bin/singlerecord.cgi?id=hsa_circ_0007964
hsa_circ:chr14:75247108-75269379	YLPM1	0	2.39428	0	0	-2.6212	0.590064	hsa_circ_0000555	http://www.circbase.org/cgi-bin/singlerecord.cgi?id=hsa_circ_0000555
hsa_circ:chr14:75497246-75509180	MLH3	0	4.78856	0	0	-3.61557	0.453691	NA	NA
hsa_circ:chr14:75506614-75509180	MLH3	9.08266	15.1638	12.6095	5.86185	-0.390881	0.828225	hsa_circ_0032644	http://www.circbase.org/cgi-bin/singlerecord.cgi?id=hsa_circ_0032644
hsa_circ:chr14:75563803-75585638	NEK9	0	0	4.84979	0	3.88232	0.42174	NA	NA
hsa_circ:chr14:75567695-75570700	NEK9	0	23.1447	10.6695	0	-1.11575	0.808094	hsa_circ_0003670	http://www.circbase.org/cgi-bin/singlerecord.cgi?id=hsa_circ_0003670
hsa_circ:chr14:75576388-75577074	NEK9	16.147	23.1447	20.3691	30.4816	0.367012	0.71913	hsa_circ_0000557	http://www.circbase.org/cgi-bin/singlerecord.cgi?id=hsa_circ_0000557
hsa_circ:chr14:76088422-76091095	FLVCR2	0	9.57713	13.5794	0	0.502772	0.912991	hsa_circ_0032689	http://www.circbase.org/cgi-bin/singlerecord.cgi?id=hsa_circ_0032689
hsa_circ:chr14:76090955-76108241	FLVCR2	0	3.19238	0	0	-3.03348	0.531288	NA	NA
hsa_circ:chr14:76107298-76108241	FLVCR2	0	12.7695	0	0	-5.02682	0.294991	NA	NA
hsa_circ:chr14:76173361-76201632	TTLL5	0	5.58666	0	0	-3.83712	0.425951	NA	NA
hsa_circ:chr14:76184204-76187046	TTLL5	0	0	0	5.86185	4.14518	0.390227	hsa_circ_0032708	http://www.circbase.org/cgi-bin/singlerecord.cgi?id=hsa_circ_0032708
hsa_circ:chr14:76198681-76201632	TTLL5	16.147	25.539	32.9786	24.6198	0.464462	0.628631	hsa_circ_0008187	http://www.circbase.org/cgi-bin/singlerecord.cgi?id=hsa_circ_0008187
hsa_circ:chr14:76211438-76232711	TTLL5	0	1.59619	0	0	-2.0415	0.676651	NA	NA
hsa_circ:chr14:76330010-76368567	TTLL5	0	0	4.84979	0	3.88232	0.42174	hsa_circ_0007946	http://www.circbase.org/cgi-bin/singlerecord.cgi?id=hsa_circ_0007946
hsa_circ:chr14:76349028-76368567	TTLL5	14.1286	0	3.87984	0	-1.85468	0.679842	hsa_circ_0032731	http://www.circbase.org/cgi-bin/singlerecord.cgi?id=hsa_circ_0032731
hsa_circ:chr14:76633006-76647192	GPATCH2L	0	0	24.249	0	6.19965	0.195968	hsa_circ_0005267	http://www.circbase.org/cgi-bin/singlerecord.cgi?id=hsa_circ_0005267
hsa_circ:chr14:76633006-76662315	GPATCH2L	29.2664	34.318	31.0387	0	-1.03159	0.678787	hsa_circ_0005252	http://www.circbase.org/cgi-bin/singlerecord.cgi?id=hsa_circ_0005252
hsa_circ:chr14:76638186-76644385	GPATCH2L	13.1194	0	0	0	-5.06117	0.291667	hsa_circ_0032741	http://www.circbase.org/cgi-bin/singlerecord.cgi?id=hsa_circ_0032741
hsa_circ:chr14:76638186-76647192	GPATCH2L	0	3.19238	6.78971	0	1.08359	0.809984	hsa_circ_0003819	http://www.circbase.org/cgi-bin/singlerecord.cgi?id=hsa_circ_0003819
hsa_circ:chr14:76642966-76662315	GPATCH2L	0	12.7695	0	0	-5.02682	0.294991	hsa_circ_0032746	http://www.circbase.org/cgi-bin/singlerecord.cgi?id=hsa_circ_0032746
hsa_circ:chr14:77930941-77932010	AHSA1	10.0918	3.19238	3.87984	0	-1.76078	0.60823	hsa_circ_0008404	http://www.circbase.org/cgi-bin/singlerecord.cgi?id=hsa_circ_0008404
hsa_circ:chr14:78018439-78023489	SPTLC2	0	14.3657	0	14.0684	-0.034271	0.994047	NA	NA
hsa_circ:chr14:78018439-78036851	SPTLC2	0	0	6.78971	15.2408	6.05902	0.0743154	NA	NA
hsa_circ:chr14:78018439-78043258	SPTLC2	9.08266	0	0	0	-4.52967	0.345973	NA	NA
hsa_circ:chr14:78023384-78043258	SPTLC2	0	0	37.8284	0	6.84076	0.15333	hsa_circ_0004187	http://www.circbase.org/cgi-bin/singlerecord.cgi?id=hsa_circ_0004187
hsa_circ:chr14:78036727-78043258	SPTLC2	22.2021	19.1543	18.4292	0	-1.15966	0.611	hsa_circ_0006706	http://www.circbase.org/cgi-bin/singlerecord.cgi?id=hsa_circ_0006706
hsa_circ:chr14:78036727-78045452	SPTLC2	0	4.78856	7.75967	0	0.693654	0.873658	hsa_circ_0007782	http://www.circbase.org/cgi-bin/singlerecord.cgi?id=hsa_circ_0007782
hsa_circ:chr14:78043110-78045452	SPTLC2	0	16.76	0	7.03422	-1.25834	0.784838	hsa_circ_0002143	http://www.circbase.org/cgi-bin/singlerecord.cgi?id=hsa_circ_0002143
hsa_circ:chr14:81209419-81227957	CEP128	0	1.59619	0	2.34474	0.524764	0.910285	hsa_circ_0032821	http://www.circbase.org/cgi-bin/singlerecord.cgi?id=hsa_circ_0032821
hsa_circ:chr14:81209419-81244390	CEP128	10.0918	13.5676	14.5494	0	-0.694228	0.758661	hsa_circ_0032822	http://www.circbase.org/cgi-bin/singlerecord.cgi?id=hsa_circ_0032822
hsa_circ:chr14:81329101-81366373	CEP128	0	2.39428	5.81975	23.4474	3.57373	0.159536	hsa_circ_0032826	http://www.circbase.org/cgi-bin/singlerecord.cgi?id=hsa_circ_0032826
hsa_circ:chr14:81329101-81372425	CEP128	9.08266	30.3276	13.5794	21.1027	-0.19274	0.874638	hsa_circ_0002499	http://www.circbase.org/cgi-bin/singlerecord.cgi?id=hsa_circ_0002499
hsa_circ:chr14:81362062-81372425	CEP128	34.3123	43.8952	36.8584	52.7567	0.191867	0.781954	NA	NA
hsa_circ:chr14:88429728-88434834	GALC	0	9.57713	0	9.37896	-0.0363034	0.993716	NA	NA
hsa_circ:chr14:88429728-88442832	GALC	13.1194	31.1257	34.9185	17.5856	0.245003	0.810153	hsa_circ_0032848	http://www.circbase.org/cgi-bin/singlerecord.cgi?id=hsa_circ_0032848
hsa_circ:chr14:88429728-88454867	GALC	0	0	9.69959	0	4.8795	0.310232	NA	NA
hsa_circ:chr14:89041037-89044484	ZC3H14	0	18.3562	11.6395	2.34474	-0.393376	0.878366	hsa_circ_0003164	http://www.circbase.org/cgi-bin/singlerecord.cgi?id=hsa_circ_0003164
hsa_circ:chr14:89319315-89327676	TTC8	12.1102	0	17.4593	9.37896	1.15963	0.607786	hsa_circ_0006603	http://www.circbase.org/cgi-bin/singlerecord.cgi?id=hsa_circ_0006603
hsa_circ:chr14:91211136-91252672	TTC7B	0	0	0	8.20659	4.63195	0.335868	NA	NA
hsa_circ:chr14:91247082-91252672	TTC7B	0	0	15.5193	0	5.55647	0.246999	hsa_circ_0000560	http://www.circbase.org/cgi-bin/singlerecord.cgi?id=hsa_circ_0000560
hsa_circ:chr14:91409422-91413894	RPS6KA5	0	0	5.81975	0	4.14443	0.390315	hsa_circ_0032939	http://www.circbase.org/cgi-bin/singlerecord.cgi?id=hsa_circ_0032939
hsa_circ:chr14:91444650-91467503	RPS6KA5	0	0	4.84979	0	3.88232	0.42174	hsa_circ_0032943	http://www.circbase.org/cgi-bin/singlerecord.cgi?id=hsa_circ_0032943
hsa_circ:chr14:91763649-91766414	CCDC88C	0	9.57713	0	0	-4.61256	0.337098	NA	NA
hsa_circ:chr14:91772109-91776330	CCDC88C	0	0	4.84979	0	3.88232	0.42174	NA	NA
hsa_circ:chr14:91947920-91952074	PPP4R3A	22.2021	17.5581	2.90988	0	-3.73257	0.0756918	hsa_circ_0003045	http://www.circbase.org/cgi-bin/singlerecord.cgi?id=hsa_circ_0003045
hsa_circ:chr14:92264129-92268765	TC2N	12.1102	3.99047	10.6695	0	-0.583623	0.832458	hsa_circ_0032969	http://www.circbase.org/cgi-bin/singlerecord.cgi?id=hsa_circ_0032969
hsa_circ:chr14:92278656-92280169	TC2N	5.04592	0	7.75967	0	0.631652	0.884651	NA	NA
hsa_circ:chr14:92465584-92466452	TRIP11	0	3.19238	0	0	-3.03348	0.531288	NA	NA
hsa_circ:chr14:92473984-92477416	TRIP11	0	0	0	17.5856	5.7333	0.232111	NA	NA
hsa_circ:chr14:92537279-92548810	ATXN3	0	0	3.87984	0	3.56175	0.462171	NA	NA
hsa_circ:chr14:92559596-92563182	ATXN3	0	8.77903	0	0	-4.48731	0.350567	hsa_circ_0007959	http://www.circbase.org/cgi-bin/singlerecord.cgi?id=hsa_circ_0007959
hsa_circ:chr14:93276599-93278099	GOLGA5	0	0	4.84979	0	3.88232	0.42174	NA	NA
hsa_circ:chr14:93460225-93483146	ITPK1	0	0	5.81975	0	4.14443	0.390315	hsa_circ_0033022	http://www.circbase.org/cgi-bin/singlerecord.cgi?id=hsa_circ_0033022
hsa_circ:chr14:93685558-93686757	UBR7	0	10.3752	0	0	-4.72779	0.325009	hsa_circ_0033031	http://www.circbase.org/cgi-bin/singlerecord.cgi?id=hsa_circ_0033031
hsa_circ:chr14:93727948-93730339	BTBD7	0	0	0	4.68948	3.8221	0.429169	hsa_circ_0033040	http://www.circbase.org/cgi-bin/singlerecord.cgi?id=hsa_circ_0033040
hsa_circ:chr14:93760204-93761283	BTBD7	0	0	3.87984	2.34474	4.23787	0.357709	hsa_circ_0006947	http://www.circbase.org/cgi-bin/singlerecord.cgi?id=hsa_circ_0006947
hsa_circ:chr14:93760204-93762503	BTBD7	0	6.38475	6.78971	11.7237	1.52279	0.590921	hsa_circ_0000563	http://www.circbase.org/cgi-bin/singlerecord.cgi?id=hsa_circ_0000563
hsa_circ:chr14:95606996-95608085	DICER1	0	0	0	10.5513	4.99527	0.298708	hsa_circ_0000564	http://www.circbase.org/cgi-bin/singlerecord.cgi?id=hsa_circ_0000564
hsa_circ:chr14:96807859-96813678	ATG2B	0	5.58666	0	0	-3.83712	0.425951	hsa_circ_0002223	http://www.circbase.org/cgi-bin/singlerecord.cgi?id=hsa_circ_0002223
hsa_circ:chr14:96986392-96987409	PAPOLA	12.1102	11.1733	14.5494	0	-0.670203	0.767929	hsa_circ_0005007	http://www.circbase.org/cgi-bin/singlerecord.cgi?id=hsa_circ_0005007
hsa_circ:chr14:96986392-96991728	PAPOLA	2.01837	18.3562	0	15.2408	-0.427442	0.876075	hsa_circ_0002120	http://www.circbase.org/cgi-bin/singlerecord.cgi?id=hsa_circ_0002120
hsa_circ:chr14:96986392-96994343	PAPOLA	8.07348	0	0	0	-4.35935	0.364681	hsa_circ_0002793	http://www.circbase.org/cgi-bin/singlerecord.cgi?id=hsa_circ_0002793
hsa_circ:chr14:96997812-96998986	PAPOLA	9.08266	0	0	0	-4.52967	0.345973	NA	NA
hsa_circ:chr14:97299804-97313681	VRK1	0	29.5295	0	0	-6.23491	0.193165	hsa_circ_0033130	http://www.circbase.org/cgi-bin/singlerecord.cgi?id=hsa_circ_0033130
hsa_circ:chr14:97299804-97319503	VRK1	0	6.38475	0	0	-4.02912	0.402745	NA	NA
hsa_circ:chr14:97299804-97327072	VRK1	18.1653	19.1543	19.3992	0	-0.938206	0.683738	hsa_circ_0000566	http://www.circbase.org/cgi-bin/singlerecord.cgi?id=hsa_circ_0000566
hsa_circ:chr14:99723808-99724173	BCL11B	11.101	12.7695	12.6095	7.03422	-0.278973	0.874175	NA	NA
hsa_circ:chr14:99924616-99929915	SETD3	0	0	4.84979	0	3.88232	0.42174	hsa_circ_0002738	http://www.circbase.org/cgi-bin/singlerecord.cgi?id=hsa_circ_0002738
hsa_circ:chr14:99924616-99932150	SETD3	139.267	177.177	137.734	144.202	-0.168808	0.641303	hsa_circ_0000567	http://www.circbase.org/cgi-bin/singlerecord.cgi?id=hsa_circ_0000567
hsa_circ:chr15:101120468-101121150	LINS1	6.05511	0	0	0	-3.94312	0.413042	NA	NA
hsa_circ:chr15:101149912-101152632	ASB7	25.2296	3.99047	4.84979	0	-2.56887	0.293976	hsa_circ_0007550	http://www.circbase.org/cgi-bin/singlerecord.cgi?id=hsa_circ_0007550
hsa_circ:chr15:101149912-101170247	ASB7	0	3.99047	0	0	-3.3537	0.487777	hsa_circ_0037064	http://www.circbase.org/cgi-bin/singlerecord.cgi?id=hsa_circ_0037064
hsa_circ:chr15:101775287-101775782	CHSY1	149.359	0	148.404	99.6515	0.73239	0.812993	hsa_circ_0005019	http://www.circbase.org/cgi-bin/singlerecord.cgi?id=hsa_circ_0005019
hsa_circ:chr15:101906401-101910728	PCSK6	68.6246	58.2608	31.0387	53.929	-0.582332	0.347755	hsa_circ_0037096	http://www.circbase.org/cgi-bin/singlerecord.cgi?id=hsa_circ_0037096
hsa_circ:chr15:101922297-101933629	PCSK6	0	3.99047	0	0	-3.3537	0.487777	NA	NA
hsa_circ:chr15:101929669-101970268	PCSK6	44.4041	4.78856	28.1288	22.275	0.0418499	0.974812	hsa_circ_0037100	http://www.circbase.org/cgi-bin/singlerecord.cgi?id=hsa_circ_0037100
hsa_circ:chr15:101968097-101972305	PCSK6	13.1194	0	0	9.37896	-0.484921	0.916112	hsa_circ_0037104	http://www.circbase.org/cgi-bin/singlerecord.cgi?id=hsa_circ_0037104
hsa_circ:chr15:22862935-22864369	TUBGCP5	13.1194	0	0	0	-5.06117	0.291667	hsa_circ_0004180	http://www.circbase.org/cgi-bin/singlerecord.cgi?id=hsa_circ_0004180
hsa_circ:chr15:22925777-22935964	CYFIP1	0	5.58666	0	0	-3.83712	0.425951	NA	NA
hsa_circ:chr15:22990057-22993155	CYFIP1	0	9.57713	0	0	-4.61256	0.337098	NA	NA
hsa_circ:chr15:22999339-23000243	CYFIP1	0	0	5.81975	0	4.14443	0.390315	hsa_circ_0034088	http://www.circbase.org/cgi-bin/singlerecord.cgi?id=hsa_circ_0034088
hsa_circ:chr15:25650608-25657118	UBE3A	0	0	87.2963	0	8.04675	0.0927984	hsa_circ_0000586	http://www.circbase.org/cgi-bin/singlerecord.cgi?id=hsa_circ_0000586
hsa_circ:chr15:28389019-28391490	HERC2	16.147	9.57713	0	14.0684	-0.878024	0.692675	hsa_circ_0003398	http://www.circbase.org/cgi-bin/singlerecord.cgi?id=hsa_circ_0003398
hsa_circ:chr15:28491027-28492043	HERC2	0	2.39428	0	0	-2.6212	0.590064	NA	NA
hsa_circ:chr15:28491027-28493882	HERC2	9.08266	10.3752	0	5.86185	-1.74402	0.534852	hsa_circ_0002814	http://www.circbase.org/cgi-bin/singlerecord.cgi?id=hsa_circ_0002814
hsa_circ:chr15:28505923-28508315	HERC2	0	11.9714	27.1588	0	1.1804	0.796971	hsa_circ_0005387	http://www.circbase.org/cgi-bin/singlerecord.cgi?id=hsa_circ_0005387
hsa_circ:chr15:29996426-29997949	TJP1	0	7.18284	0	0	-4.19854	0.382922	NA	NA
hsa_circ:chr15:30053342-30065560	TJP1	0	19.1543	9.69959	0	-0.98025	0.831172	hsa_circ_0034293	http://www.circbase.org/cgi-bin/singlerecord.cgi?id=hsa_circ_0034293
hsa_circ:chr15:30058469-30058745	TJP1	0	3.99047	0	0	-3.3537	0.487777	NA	NA
hsa_circ:chr15:30058469-30064369	TJP1	8.07348	2.39428	0	0	-4.73593	0.290012	NA	NA
hsa_circ:chr15:30058469-30092905	TJP1	0	7.98094	0	0	-4.35014	0.36571	hsa_circ_0034296	http://www.circbase.org/cgi-bin/singlerecord.cgi?id=hsa_circ_0034296
hsa_circ:chr15:31266517-31269158	MTMR10	0	0	10.6695	0	5.01674	0.296603	NA	NA
hsa_circ:chr15:33180373-33194241	FMN1	0	7.18284	0	0	-4.19854	0.382922	hsa_circ_0008589	http://www.circbase.org/cgi-bin/singlerecord.cgi?id=hsa_circ_0008589
hsa_circ:chr15:35174703-35178862	AQR	0	3.19238	0	0	-3.03348	0.531288	NA	NA
hsa_circ:chr15:35207239-35219339	AQR	15.1378	7.98094	0	0	-5.87994	0.0759129	NA	NA
hsa_circ:chr15:36983886-37002162	C15orf41	0	0	5.81975	21.1027	6.34777	0.0410593	hsa_circ_0008295	http://www.circbase.org/cgi-bin/singlerecord.cgi?id=hsa_circ_0008295
hsa_circ:chr15:38591574-38617010	SPRED1	28.2572	0	0	0	-6.16927	0.197923	hsa_circ_0004229	http://www.circbase.org/cgi-bin/singlerecord.cgi?id=hsa_circ_0004229
hsa_circ:chr15:38591574-38632096	SPRED1	0	9.57713	0	0	-4.61256	0.337098	hsa_circ_0003140	http://www.circbase.org/cgi-bin/singlerecord.cgi?id=hsa_circ_0003140
hsa_circ:chr15:38614442-38632096	SPRED1	4.03674	0	0	0	-3.35581	0.487497	NA	NA
hsa_circ:chr15:38794513-38800202	RASGRP1	0	7.98094	0	0	-4.35014	0.36571	hsa_circ_0034415	http://www.circbase.org/cgi-bin/singlerecord.cgi?id=hsa_circ_0034415
hsa_circ:chr15:40265109-40269045	EIF2AK4	0	0	2.90988	0	3.1489	0.517345	hsa_circ_0034553	http://www.circbase.org/cgi-bin/singlerecord.cgi?id=hsa_circ_0034553
hsa_circ:chr15:40301815-40311401	EIF2AK4	0	2.39428	1.93992	0	-0.301829	0.948152	hsa_circ_0034557	http://www.circbase.org/cgi-bin/singlerecord.cgi?id=hsa_circ_0034557
hsa_circ:chr15:40475915-40477843	BUB1B	0	0	7.75967	11.7237	5.88228	0.101127	hsa_circ_0008471	http://www.circbase.org/cgi-bin/singlerecord.cgi?id=hsa_circ_0008471
hsa_circ:chr15:40477366-40477843	BUB1B	14.1286	0	13.5794	0	-0.0529186	0.99081	hsa_circ_0008946	http://www.circbase.org/cgi-bin/singlerecord.cgi?id=hsa_circ_0008946
hsa_circ:chr15:40699837-40700189	IVD	13.1194	11.1733	8.72963	0	-1.46482	0.54644	hsa_circ_0004818	http://www.circbase.org/cgi-bin/singlerecord.cgi?id=hsa_circ_0004818
hsa_circ:chr15:40750650-40754493	BAHD1	0	3.19238	0	0	-3.03348	0.531288	hsa_circ_0003821	http://www.circbase.org/cgi-bin/singlerecord.cgi?id=hsa_circ_0003821
hsa_circ:chr15:40863803-40864099	RPUSD2	0	4.78856	0	0	-3.61557	0.453691	hsa_circ_0034595	http://www.circbase.org/cgi-bin/singlerecord.cgi?id=hsa_circ_0034595
hsa_circ:chr15:41001223-41021022	RAD51	0	7.18284	5.81975	15.2408	1.53805	0.563991	hsa_circ_0034616	http://www.circbase.org/cgi-bin/singlerecord.cgi?id=hsa_circ_0034616
hsa_circ:chr15:41036245-41037457	RMDN3	31.2847	31.9238	32.0086	0	-0.978642	0.695487	hsa_circ_0004942	http://www.circbase.org/cgi-bin/singlerecord.cgi?id=hsa_circ_0004942
hsa_circ:chr15:41308286-41319934	ENSG00000259521.1,INO80	5.04592	0	0	0	-3.67914	0.445627	NA	NA
hsa_circ:chr15:41313098-41319934	ENSG00000259521.1,INO80	14.1286	9.57713	10.6695	0	-1.14112	0.632599	hsa_circ_0034657	http://www.circbase.org/cgi-bin/singlerecord.cgi?id=hsa_circ_0034657
hsa_circ:chr15:41347445-41350979	INO80	0	0	0	2.34474	2.81658	0.564129	hsa_circ_0034669	http://www.circbase.org/cgi-bin/singlerecord.cgi?id=hsa_circ_0034669
hsa_circ:chr15:41361768-41364256	INO80	0	0	10.6695	0	5.01674	0.296603	NA	NA
hsa_circ:chr15:41361768-41366763	INO80	0	0	3.87984	0	3.56175	0.462171	hsa_circ_0006525	http://www.circbase.org/cgi-bin/singlerecord.cgi?id=hsa_circ_0006525
hsa_circ:chr15:41373218-41377781	INO80	0	0	1.93992	0	2.56807	0.600374	NA	NA
hsa_circ:chr15:41373218-41379880	INO80	0	0	6.78971	0	4.36615	0.364903	hsa_circ_0007993	http://www.circbase.org/cgi-bin/singlerecord.cgi?id=hsa_circ_0007993
hsa_circ:chr15:41377567-41379880	INO80	6.05511	11.1733	3.87984	0	-2.13632	0.486684	hsa_circ_0004279	http://www.circbase.org/cgi-bin/singlerecord.cgi?id=hsa_circ_0004279
hsa_circ:chr15:41387799-41388551	INO80	0	0	11.6395	17.5856	6.46722	0.0287497	NA	NA
hsa_circ:chr15:41648237-41669502	NUSAP1	9.08266	0	0	12.8961	0.506824	0.912336	hsa_circ_0008346	http://www.circbase.org/cgi-bin/singlerecord.cgi?id=hsa_circ_0008346
hsa_circ:chr15:41667910-41669502	NUSAP1	0	8.77903	16.4893	19.9303	2.03517	0.310135	hsa_circ_0002124	http://www.circbase.org/cgi-bin/singlerecord.cgi?id=hsa_circ_0002124
hsa_circ:chr15:41854746-41857339	TYRO3	0	3.19238	0	0	-3.03348	0.531288	hsa_circ_0005487	http://www.circbase.org/cgi-bin/singlerecord.cgi?id=hsa_circ_0005487
hsa_circ:chr15:41961026-41962156	MGA	26.2388	25.539	5.81975	21.1027	-0.952458	0.417555	hsa_circ_0000591	http://www.circbase.org/cgi-bin/singlerecord.cgi?id=hsa_circ_0000591
hsa_circ:chr15:41988273-41991357	MGA	14.1286	0	10.6695	0	-0.400271	0.93065	hsa_circ_0000592	http://www.circbase.org/cgi-bin/singlerecord.cgi?id=hsa_circ_0000592
hsa_circ:chr15:42103081-42105299	MAPKBP1	0	0	0	21.1027	5.9966	0.211156	hsa_circ_0034762	http://www.circbase.org/cgi-bin/singlerecord.cgi?id=hsa_circ_0034762
hsa_circ:chr15:42927054-42931010	STARD9	0	7.18284	0	0	-4.19854	0.382922	NA	NA
hsa_circ:chr15:43120126-43132631	TTBK2	0	19.9523	9.69959	0	-1.03908	0.82119	hsa_circ_0008319	http://www.circbase.org/cgi-bin/singlerecord.cgi?id=hsa_circ_0008319
hsa_circ:chr15:43120126-43170882	TTBK2	8.07348	0	0	0	-4.35935	0.364681	hsa_circ_0006297	http://www.circbase.org/cgi-bin/singlerecord.cgi?id=hsa_circ_0006297
hsa_circ:chr15:43164809-43170882	TTBK2	0	0	0	2.34474	2.81658	0.564129	hsa_circ_0034880	http://www.circbase.org/cgi-bin/singlerecord.cgi?id=hsa_circ_0034880
hsa_circ:chr15:43242460-43252899	UBR1	0	7.98094	0	0	-4.35014	0.36571	NA	NA
hsa_circ:chr15:43242460-43258484	UBR1	0	16.76	34.9185	0	1.05802	0.81736	hsa_circ_0008546	http://www.circbase.org/cgi-bin/singlerecord.cgi?id=hsa_circ_0008546
hsa_circ:chr15:43290366-43299482	UBR1	0	0	0	9.37896	4.82502	0.315758	NA	NA
hsa_circ:chr15:43348542-43351390	UBR1	0	10.3752	0	0	-4.72779	0.325009	NA	NA
hsa_circ:chr15:43627143-43628024	ADAL	16.147	0	11.6395	14.0684	0.677338	0.778709	hsa_circ_0034947	http://www.circbase.org/cgi-bin/singlerecord.cgi?id=hsa_circ_0034947
hsa_circ:chr15:43672282-43675702	TUBGCP4	18.1653	0	0	0	-5.53127	0.24874	hsa_circ_0034962	http://www.circbase.org/cgi-bin/singlerecord.cgi?id=hsa_circ_0034962
hsa_circ:chr15:43692242-43694048	TUBGCP4	17.1561	21.5485	11.6395	9.37896	-0.880264	0.52221	hsa_circ_0034972	http://www.circbase.org/cgi-bin/singlerecord.cgi?id=hsa_circ_0034972
hsa_circ:chr15:43724392-43730614	TP53BP1	4.03674	0	0	0	-3.35581	0.487497	NA	NA
hsa_circ:chr15:44046022-44048964	PDIA3	0	16.76	14.5494	18.7579	0.983467	0.671539	hsa_circ_0002151	http://www.circbase.org/cgi-bin/singlerecord.cgi?id=hsa_circ_0002151
hsa_circ:chr15:44048847-44055404	PDIA3	0	0	21.3391	11.7237	6.64678	0.0171885	hsa_circ_0002891	http://www.circbase.org/cgi-bin/singlerecord.cgi?id=hsa_circ_0002891
hsa_circ:chr15:44053622-44055404	PDIA3	12.1102	3.99047	13.5794	8.20659	0.44317	0.822192	hsa_circ_0003598	http://www.circbase.org/cgi-bin/singlerecord.cgi?id=hsa_circ_0003598
hsa_circ:chr15:44106699-44107272	MFAP1	0	0	2.90988	0	3.1489	0.517345	NA	NA
hsa_circ:chr15:44149144-44153584	WDR76	0	0	5.81975	0	4.14443	0.390315	hsa_circ_0035047	http://www.circbase.org/cgi-bin/singlerecord.cgi?id=hsa_circ_0035047
hsa_circ:chr15:44194373-44216507	FRMD5	0	0	9.69959	0	4.8795	0.310232	NA	NA
hsa_circ:chr15:44624186-44630515	CASC4	4.03674	0	0	0	-3.35581	0.487497	hsa_circ_0000596	http://www.circbase.org/cgi-bin/singlerecord.cgi?id=hsa_circ_0000596
hsa_circ:chr15:44782982-44788656	CTDSPL2	0	4.78856	0	0	-3.61557	0.453691	hsa_circ_0035060	http://www.circbase.org/cgi-bin/singlerecord.cgi?id=hsa_circ_0035060
hsa_circ:chr15:44788578-44789336	CTDSPL2	0	0	0	9.37896	4.82502	0.315758	hsa_circ_0007705	http://www.circbase.org/cgi-bin/singlerecord.cgi?id=hsa_circ_0007705
hsa_circ:chr15:44884529-44889141	SPG11	0	0	9.69959	0	4.8795	0.310232	hsa_circ_0035086	http://www.circbase.org/cgi-bin/singlerecord.cgi?id=hsa_circ_0035086
hsa_circ:chr15:44898223-44903183	SPG11	0	0	0	14.0684	5.41091	0.253109	hsa_circ_0007457	http://www.circbase.org/cgi-bin/singlerecord.cgi?id=hsa_circ_0007457
hsa_circ:chr15:45360379-45361250	SORD	9.08266	0	0	0	-4.52967	0.345973	hsa_circ_0035112	http://www.circbase.org/cgi-bin/singlerecord.cgi?id=hsa_circ_0035112
hsa_circ:chr15:45656995-45669017	GATM	0	0	0	5.86185	4.14518	0.390227	NA	NA
hsa_circ:chr15:45781039-45783079	SLC30A4	0	3.99047	0	0	-3.3537	0.487777	NA	NA
hsa_circ:chr15:49528048-49531564	GALK2	56.5143	40.7028	29.0988	28.1369	-0.761878	0.294376	hsa_circ_0008488	http://www.circbase.org/cgi-bin/singlerecord.cgi?id=hsa_circ_0008488
hsa_circ:chr15:49528048-49575915	GALK2	33.3031	0	4.84979	0	-2.77292	0.548209	hsa_circ_0035188	http://www.circbase.org/cgi-bin/singlerecord.cgi?id=hsa_circ_0035188
hsa_circ:chr15:49528048-49584734	GALK2	18.1653	5.58666	10.6695	12.8961	-0.00718434	0.996598	hsa_circ_0035189	http://www.circbase.org/cgi-bin/singlerecord.cgi?id=hsa_circ_0035189
hsa_circ:chr15:49528048-49612002	GALK2	0	0	0	8.20659	4.63195	0.335868	hsa_circ_0004845	http://www.circbase.org/cgi-bin/singlerecord.cgi?id=hsa_circ_0004845
hsa_circ:chr15:50592986-50593565	GABPB1	0	7.98094	9.69959	16.4132	1.69575	0.479046	hsa_circ_0002551	http://www.circbase.org/cgi-bin/singlerecord.cgi?id=hsa_circ_0002551
hsa_circ:chr15:50592986-50601995	GABPB1	18.1653	11.1733	18.4292	0	-0.663767	0.774275	hsa_circ_0003501	http://www.circbase.org/cgi-bin/singlerecord.cgi?id=hsa_circ_0003501
hsa_circ:chr15:50596163-50601995	GABPB1	10.0918	0	0	0	-4.682	0.329779	hsa_circ_0035209	http://www.circbase.org/cgi-bin/singlerecord.cgi?id=hsa_circ_0035209
hsa_circ:chr15:50733546-50741682	USP8	2.01837	0	0	0	-2.34908	0.630393	NA	NA
hsa_circ:chr15:50741597-50751359	USP8	8.07348	20.7504	0	0	-6.2005	0.0381208	hsa_circ_0035214	http://www.circbase.org/cgi-bin/singlerecord.cgi?id=hsa_circ_0035214
hsa_circ:chr15:50741597-50757388	USP8	11.101	0	0	0	-4.81976	0.315569	hsa_circ_0035215	http://www.circbase.org/cgi-bin/singlerecord.cgi?id=hsa_circ_0035215
hsa_circ:chr15:50741597-50763992	USP8	0	0	0	16.4132	5.63365	0.240419	hsa_circ_0000599	http://www.circbase.org/cgi-bin/singlerecord.cgi?id=hsa_circ_0000599
hsa_circ:chr15:50757244-50763992	USP8	0	0	11.6395	0	5.14205	0.284521	hsa_circ_0035216	http://www.circbase.org/cgi-bin/singlerecord.cgi?id=hsa_circ_0035216
hsa_circ:chr15:50763830-50769696	USP8	0	3.19238	0	0	-3.03348	0.531288	hsa_circ_0003879	http://www.circbase.org/cgi-bin/singlerecord.cgi?id=hsa_circ_0003879
hsa_circ:chr15:50867049-50867986	TRPM7	0	31.1257	0	30.4816	-0.0320459	0.994413	hsa_circ_0008693	http://www.circbase.org/cgi-bin/singlerecord.cgi?id=hsa_circ_0008693
hsa_circ:chr15:50878589-50884823	TRPM7	0	11.1733	7.75967	0	-0.524954	0.908209	NA	NA
hsa_circ:chr15:50923614-50926753	TRPM7	0	4.78856	11.6395	0	1.27735	0.771525	hsa_circ_0035248	http://www.circbase.org/cgi-bin/singlerecord.cgi?id=hsa_circ_0035248
hsa_circ:chr15:50923614-50941082	TRPM7	18.1653	8.77903	8.72963	12.8961	-0.316116	0.846399	hsa_circ_0008637	http://www.circbase.org/cgi-bin/singlerecord.cgi?id=hsa_circ_0008637
hsa_circ:chr15:50923614-50955243	TRPM7	0	10.3752	0	0	-4.72779	0.325009	hsa_circ_0035249	http://www.circbase.org/cgi-bin/singlerecord.cgi?id=hsa_circ_0035249
hsa_circ:chr15:50926579-50931745	TRPM7	0	15.9619	0	16.4132	0.0366154	0.993635	NA	NA
hsa_circ:chr15:50929619-50931745	TRPM7	5.04592	3.99047	8.72963	5.86185	0.693799	0.786819	hsa_circ_0007206	http://www.circbase.org/cgi-bin/singlerecord.cgi?id=hsa_circ_0007206
hsa_circ:chr15:50929619-50941082	TRPM7	0	4.78856	4.84979	0	0.0179616	0.996826	hsa_circ_0000601	http://www.circbase.org/cgi-bin/singlerecord.cgi?id=hsa_circ_0000601
hsa_circ:chr15:50935537-50941082	TRPM7	0	7.98094	8.72963	15.2408	1.57306	0.526563	hsa_circ_0035252	http://www.circbase.org/cgi-bin/singlerecord.cgi?id=hsa_circ_0035252
hsa_circ:chr15:50935537-50955243	TRPM7	24.2204	39.1066	16.4893	12.8961	-1.10776	0.273753	hsa_circ_0004951	http://www.circbase.org/cgi-bin/singlerecord.cgi?id=hsa_circ_0004951
hsa_circ:chr15:50940884-50955243	TRPM7	22.2021	28.7314	0	25.7922	-0.985669	0.693527	hsa_circ_0007775	http://www.circbase.org/cgi-bin/singlerecord.cgi?id=hsa_circ_0007775
hsa_circ:chr15:51039692-51041067	SPPL2A	0	0	0	14.0684	5.41091	0.253109	NA	NA
hsa_circ:chr15:51204275-51223168	AP4E1	2.01837	0	2.90988	0	0.552074	0.905389	NA	NA
hsa_circ:chr15:51260460-51276342	AP4E1	5.04592	0	0	0	-3.67914	0.445627	hsa_circ_0035273	http://www.circbase.org/cgi-bin/singlerecord.cgi?id=hsa_circ_0035273
hsa_circ:chr15:52186012-52194233	TMOD3	0	3.19238	0	0	-3.03348	0.531288	hsa_circ_0035296	http://www.circbase.org/cgi-bin/singlerecord.cgi?id=hsa_circ_0035296
hsa_circ:chr15:52338027-52342334	MAPK6	0	0	7.75967	0	4.55829	0.343757	NA	NA
hsa_circ:chr15:52521330-52532076	MYO5C	0	4.78856	0	0	-3.61557	0.453691	NA	NA
hsa_circ:chr15:52524819-52532076	MYO5C	8.07348	0	0	0	-4.35935	0.364681	NA	NA
hsa_circ:chr15:55516087-55527154	RAB27A	12.1102	9.57713	0	5.86185	-1.90089	0.479492	hsa_circ_0003863	http://www.circbase.org/cgi-bin/singlerecord.cgi?id=hsa_circ_0003863
hsa_circ:chr15:55916540-55919326	PRTG	0	0	0	10.5513	4.99527	0.298708	NA	NA
hsa_circ:chr15:56686363-56687032	ENSG00000259941.1,TEX9	5.04592	0	0	0	-3.67914	0.445627	NA	NA
hsa_circ:chr15:59179174-59179739	SLTM	14.1286	0	17.4593	12.8961	1.11194	0.636978	hsa_circ_0000604	http://www.circbase.org/cgi-bin/singlerecord.cgi?id=hsa_circ_0000604
hsa_circ:chr15:59204762-59205895	SLTM	24.2204	11.1733	13.5794	28.1369	0.238241	0.838564	hsa_circ_0003713	http://www.circbase.org/cgi-bin/singlerecord.cgi?id=hsa_circ_0003713
hsa_circ:chr15:59323003-59323901	RNF111	0	9.57713	0	11.7237	0.286222	0.950431	hsa_circ_0001982	http://www.circbase.org/cgi-bin/singlerecord.cgi?id=hsa_circ_0001982
hsa_circ:chr15:59445789-59450578	MYO1E	0	0	3.87984	0	3.56175	0.462171	hsa_circ_0035505	http://www.circbase.org/cgi-bin/singlerecord.cgi?id=hsa_circ_0035505
hsa_circ:chr15:59464096-59510286	MYO1E	0	0	0	8.20659	4.63195	0.335868	NA	NA
hsa_circ:chr15:59470592-59480415	MYO1E	0	0	14.5494	0	5.46349	0.255095	hsa_circ_0005211	http://www.circbase.org/cgi-bin/singlerecord.cgi?id=hsa_circ_0005211
hsa_circ:chr15:59480317-59506919	MYO1E	0	0	0	4.68948	3.8221	0.429169	NA	NA
hsa_circ:chr15:59487660-59506919	MYO1E	0	1.59619	0	0	-2.0415	0.676651	NA	NA
hsa_circ:chr15:59510090-59523990	MYO1E	0	0	0	8.20659	4.63195	0.335868	NA	NA
hsa_circ:chr15:59963382-59964938	BNIP2	0	0	7.75967	0	4.55829	0.343757	hsa_circ_0035537	http://www.circbase.org/cgi-bin/singlerecord.cgi?id=hsa_circ_0035537
hsa_circ:chr15:60648118-60656722	ANXA2	0	11.1733	0	0	-4.8345	0.314073	hsa_circ_0035554	http://www.circbase.org/cgi-bin/singlerecord.cgi?id=hsa_circ_0035554
hsa_circ:chr15:60674541-60678285	ANXA2	0	0	0	9.37896	4.82502	0.315758	hsa_circ_0005327	http://www.circbase.org/cgi-bin/singlerecord.cgi?id=hsa_circ_0005327
hsa_circ:chr15:62202376-62204203	VPS13C	3.02755	0	0	0	-2.93848	0.544567	NA	NA
hsa_circ:chr15:62264824-62273677	VPS13C	0	0	6.78971	16.4132	6.13373	0.0644303	NA	NA
hsa_circ:chr15:62283199-62284001	VPS13C	0	0	0	12.8961	5.28526	0.271134	NA	NA
hsa_circ:chr15:62966026-62978995	TLN2	0	0	9.69959	0	4.8795	0.310232	NA	NA
hsa_circ:chr15:63068963-63076089	TLN2	8.07348	0	0	3.51711	-1.2033	0.787287	NA	NA
hsa_circ:chr15:63821213-63829355	USP3	23.2112	0	2.90988	0	-2.98482	0.514938	hsa_circ_0008104	http://www.circbase.org/cgi-bin/singlerecord.cgi?id=hsa_circ_0008104
hsa_circ:chr15:63821213-63855207	USP3	0	9.57713	0	0	-4.61256	0.337098	hsa_circ_0007349	http://www.circbase.org/cgi-bin/singlerecord.cgi?id=hsa_circ_0007349
hsa_circ:chr15:63824846-63829355	USP3	0	11.9714	0	0	-4.93386	0.304114	hsa_circ_0000612	http://www.circbase.org/cgi-bin/singlerecord.cgi?id=hsa_circ_0000612
hsa_circ:chr15:63824846-63855207	USP3	23.2112	27.1352	24.249	28.1369	0.0551398	0.952504	hsa_circ_0002138	http://www.circbase.org/cgi-bin/singlerecord.cgi?id=hsa_circ_0002138
hsa_circ:chr15:63845914-63855207	USP3	24.2204	0	10.6695	24.6198	0.545844	0.834851	hsa_circ_0008153	http://www.circbase.org/cgi-bin/singlerecord.cgi?id=hsa_circ_0008153
hsa_circ:chr15:63850305-63852169	USP3	2.01837	0	0	0	-2.34908	0.630393	hsa_circ_0035655	http://www.circbase.org/cgi-bin/singlerecord.cgi?id=hsa_circ_0035655
hsa_circ:chr15:63929704-63944740	HERC1	0	1.59619	0	0	-2.0415	0.676651	NA	NA
hsa_circ:chr15:63982740-63987093	HERC1	0	6.38475	0	0	-4.02912	0.402745	NA	NA
hsa_circ:chr15:63988323-64008672	HERC1	8.07348	8.77903	15.5193	8.20659	0.495353	0.789353	hsa_circ_0035796	http://www.circbase.org/cgi-bin/singlerecord.cgi?id=hsa_circ_0035796
hsa_circ:chr15:64410316-64415745	SNX1	0	0	9.69959	0	4.8795	0.310232	hsa_circ_0035818	http://www.circbase.org/cgi-bin/singlerecord.cgi?id=hsa_circ_0035818
hsa_circ:chr15:64496640-64497148	CSNK1G1	0	0	17.4593	0	5.72619	0.232696	hsa_circ_0035828	http://www.circbase.org/cgi-bin/singlerecord.cgi?id=hsa_circ_0035828
hsa_circ:chr15:64543711-64592922	CSNK1G1	0	0	0	5.86185	4.14518	0.390227	hsa_circ_0004256	http://www.circbase.org/cgi-bin/singlerecord.cgi?id=hsa_circ_0004256
hsa_circ:chr15:64592518-64592922	CSNK1G1	0	0	19.3992	17.5856	6.80775	0.00970867	hsa_circ_0007949	http://www.circbase.org/cgi-bin/singlerecord.cgi?id=hsa_circ_0007949
hsa_circ:chr15:64710740-64717830	TRIP4	35.3215	0	11.6395	17.5856	-0.271431	0.920039	NA	NA
hsa_circ:chr15:65110145-65111422	PIF1	0	37.5104	18.4292	35.1711	0.512068	0.846972	hsa_circ_0002205	http://www.circbase.org/cgi-bin/singlerecord.cgi?id=hsa_circ_0002205
hsa_circ:chr15:65114465-65116553	PIF1	13.1194	12.7695	0	0	-6.04413	0.0535573	hsa_circ_0035855	http://www.circbase.org/cgi-bin/singlerecord.cgi?id=hsa_circ_0035855
hsa_circ:chr15:65115977-65116553	PIF1	0	0	0	14.0684	5.41091	0.253109	hsa_circ_0008331	http://www.circbase.org/cgi-bin/singlerecord.cgi?id=hsa_circ_0008331
hsa_circ:chr15:65223020-65226434	ANKDD1A	0	0	2.90988	0	3.1489	0.517345	hsa_circ_0035861	http://www.circbase.org/cgi-bin/singlerecord.cgi?id=hsa_circ_0035861
hsa_circ:chr15:65266940-65268893	SPG21	13.1194	0	0	0	-5.06117	0.291667	hsa_circ_0035872	http://www.circbase.org/cgi-bin/singlerecord.cgi?id=hsa_circ_0035872
hsa_circ:chr15:65266940-65275931	SPG21	0	18.3562	1.93992	10.5513	-0.5651	0.830493	hsa_circ_0003526	http://www.circbase.org/cgi-bin/singlerecord.cgi?id=hsa_circ_0003526
hsa_circ:chr15:65273202-65275931	SPG21	15.1378	0	35.8885	24.6198	2.00668	0.398178	hsa_circ_0035875	http://www.circbase.org/cgi-bin/singlerecord.cgi?id=hsa_circ_0035875
hsa_circ:chr15:65316010-65319378	MTFMT	0	1.59619	0	0	-2.0415	0.676651	NA	NA
hsa_circ:chr15:65445885-65447419	CLPX	4.03674	0	0	0	-3.35581	0.487497	hsa_circ_0035877	http://www.circbase.org/cgi-bin/singlerecord.cgi?id=hsa_circ_0035877
hsa_circ:chr15:65471272-65472542	CLPX	14.1286	24.7409	44.6181	0	0.2003	0.939887	hsa_circ_0004374	http://www.circbase.org/cgi-bin/singlerecord.cgi?id=hsa_circ_0004374
hsa_circ:chr15:65746601-65748709	DPP8	7.06429	0	0	0	-4.16619	0.386659	NA	NA
hsa_circ:chr15:65773853-65780156	DPP8	0	0	8.72963	0	4.72782	0.325779	NA	NA
hsa_circ:chr15:65780028-65793117	DPP8	0	5.58666	0	0	-3.83712	0.425951	NA	NA
hsa_circ:chr15:65799581-65804902	DPP8	0	1.59619	4.84979	0	1.59167	0.731221	hsa_circ_0006487	http://www.circbase.org/cgi-bin/singlerecord.cgi?id=hsa_circ_0006487
hsa_circ:chr15:65799581-65808129	DPP8	9.08266	0	0	0	-4.52967	0.345973	NA	NA
hsa_circ:chr15:65885766-65888163	INTS14	4.03674	0	0	0	-3.35581	0.487497	NA	NA
hsa_circ:chr15:65994643-65995346	DENND4A	0	0	2.90988	0	3.1489	0.517345	hsa_circ_0007072	http://www.circbase.org/cgi-bin/singlerecord.cgi?id=hsa_circ_0007072
hsa_circ:chr15:66599162-66601182	DIS3L	7.06429	0	5.81975	0	-0.269311	0.95061	hsa_circ_0035958	http://www.circbase.org/cgi-bin/singlerecord.cgi?id=hsa_circ_0035958
hsa_circ:chr15:66727365-66729230	MAP2K1	12.1102	43.0971	28.1288	17.5856	-0.275542	0.787376	hsa_circ_0008798	http://www.circbase.org/cgi-bin/singlerecord.cgi?id=hsa_circ_0008798
hsa_circ:chr15:66727365-66737045	MAP2K1	0	0	0	8.20659	4.63195	0.335868	hsa_circ_0035969	http://www.circbase.org/cgi-bin/singlerecord.cgi?id=hsa_circ_0035969
hsa_circ:chr15:66774093-66777529	MAP2K1	4.03674	6.38475	0	0	-4.73212	0.288696	hsa_circ_0035976	http://www.circbase.org/cgi-bin/singlerecord.cgi?id=hsa_circ_0035976
hsa_circ:chr15:67457233-67462942	SMAD3	7.06429	0	0	0	-4.16619	0.386659	hsa_circ_0003973	http://www.circbase.org/cgi-bin/singlerecord.cgi?id=hsa_circ_0003973
hsa_circ:chr15:67524152-67529158	AAGAB	100.918	100.56	91.1761	72.687	-0.296078	0.509891	hsa_circ_0000620	http://www.circbase.org/cgi-bin/singlerecord.cgi?id=hsa_circ_0000620
hsa_circ:chr15:67528317-67529158	AAGAB	12.1102	0	0	0	-4.94551	0.30296	hsa_circ_0003651	http://www.circbase.org/cgi-bin/singlerecord.cgi?id=hsa_circ_0003651
hsa_circ:chr15:68434284-68439038	PIAS1	0	5.58666	0	0	-3.83712	0.425951	hsa_circ_0008378	http://www.circbase.org/cgi-bin/singlerecord.cgi?id=hsa_circ_0008378
hsa_circ:chr15:68434284-68446033	PIAS1	0	0	0	8.20659	4.63195	0.335868	hsa_circ_0003916	http://www.circbase.org/cgi-bin/singlerecord.cgi?id=hsa_circ_0003916
hsa_circ:chr15:68434284-68466230	PIAS1	0	20.7504	0	0	-5.72634	0.232309	hsa_circ_0007088	http://www.circbase.org/cgi-bin/singlerecord.cgi?id=hsa_circ_0007088
hsa_circ:chr15:68501975-68504201	CLN6	0	3.99047	0	0	-3.3537	0.487777	NA	NA
hsa_circ:chr15:69502655-69553668	GLCE	0	0	0	9.37896	4.82502	0.315758	NA	NA
hsa_circ:chr15:69709722-69714774	KIF23	0	9.57713	0	0	-4.61256	0.337098	hsa_circ_0004252	http://www.circbase.org/cgi-bin/singlerecord.cgi?id=hsa_circ_0004252
hsa_circ:chr15:69713986-69714774	KIF23	5.04592	13.5676	0	0	-5.56951	0.130517	hsa_circ_0004266	http://www.circbase.org/cgi-bin/singlerecord.cgi?id=hsa_circ_0004266
hsa_circ:chr15:69715498-69718796	KIF23	7.06429	0	0	4.68948	-0.593017	0.893789	hsa_circ_0036084	http://www.circbase.org/cgi-bin/singlerecord.cgi?id=hsa_circ_0036084
hsa_circ:chr15:69728477-69729061	KIF23	0	9.57713	31.0387	0	1.69421	0.712125	hsa_circ_0003166	http://www.circbase.org/cgi-bin/singlerecord.cgi?id=hsa_circ_0003166
hsa_circ:chr15:70979879-70991999	UACA	0	3.19238	0	0	-3.03348	0.531288	hsa_circ_0036103	http://www.circbase.org/cgi-bin/singlerecord.cgi?id=hsa_circ_0036103
hsa_circ:chr15:72499069-72501232	PKM	6.05511	0	0	0	-3.94312	0.413042	hsa_circ_0004249	http://www.circbase.org/cgi-bin/singlerecord.cgi?id=hsa_circ_0004249
hsa_circ:chr15:72502014-72502819	PKM	0	3.99047	0	0	-3.3537	0.487777	hsa_circ_0036197	http://www.circbase.org/cgi-bin/singlerecord.cgi?id=hsa_circ_0036197
hsa_circ:chr15:72810408-72837305	ARIH1	0	0	7.75967	7.03422	5.48573	0.181262	hsa_circ_0006314	http://www.circbase.org/cgi-bin/singlerecord.cgi?id=hsa_circ_0006314
hsa_circ:chr15:72837161-72864506	ARIH1	0	7.98094	8.72963	0	0.128887	0.977024	hsa_circ_0008808	http://www.circbase.org/cgi-bin/singlerecord.cgi?id=hsa_circ_0008808
hsa_circ:chr15:72855735-72862648	ARIH1	6.05511	5.58666	4.84979	0	-1.25312	0.719096	hsa_circ_0036231	http://www.circbase.org/cgi-bin/singlerecord.cgi?id=hsa_circ_0036231
hsa_circ:chr15:72855735-72864506	ARIH1	8.07348	0	0	0	-4.35935	0.364681	hsa_circ_0036232	http://www.circbase.org/cgi-bin/singlerecord.cgi?id=hsa_circ_0036232
hsa_circ:chr15:73052748-73067438	ADPGK	4.03674	30.3276	10.6695	0	-1.68077	0.497523	hsa_circ_0004033	http://www.circbase.org/cgi-bin/singlerecord.cgi?id=hsa_circ_0004033
hsa_circ:chr15:73064124-73067438	ADPGK	23.2112	13.5676	9.69959	9.37896	-0.944479	0.517347	hsa_circ_0000631	http://www.circbase.org/cgi-bin/singlerecord.cgi?id=hsa_circ_0000631
hsa_circ:chr15:73854237-73866136	NPTN	0	9.57713	0	0	-4.61256	0.337098	hsa_circ_0007390	http://www.circbase.org/cgi-bin/singlerecord.cgi?id=hsa_circ_0007390
hsa_circ:chr15:73991927-73996813	CD276	20.1837	3.99047	28.1288	0	0.223969	0.933857	hsa_circ_0036254	http://www.circbase.org/cgi-bin/singlerecord.cgi?id=hsa_circ_0036254
hsa_circ:chr15:74911538-74912566	CLK3	14.1286	15.1638	0	0	-6.22248	0.0347906	hsa_circ_0036287	http://www.circbase.org/cgi-bin/singlerecord.cgi?id=hsa_circ_0036287
hsa_circ:chr15:74948074-74948409	EDC3	7.06429	24.7409	14.5494	16.4132	-0.0452644	0.973644	hsa_circ_0004401	http://www.circbase.org/cgi-bin/singlerecord.cgi?id=hsa_circ_0004401
hsa_circ:chr15:74963796-74967483	EDC3	14.1286	44.6933	44.6181	38.6882	0.494784	0.549702	hsa_circ_0000633	http://www.circbase.org/cgi-bin/singlerecord.cgi?id=hsa_circ_0000633
hsa_circ:chr15:75215989-75219228	COX5A	8.07348	23.1447	50.4379	55.1014	1.74392	0.0376703	hsa_circ_0007840	http://www.circbase.org/cgi-bin/singlerecord.cgi?id=hsa_circ_0007840
hsa_circ:chr15:75215989-75221573	COX5A	0	6.38475	8.72963	10.5513	1.58171	0.569799	hsa_circ_0006810	http://www.circbase.org/cgi-bin/singlerecord.cgi?id=hsa_circ_0006810
hsa_circ:chr15:75219107-75221573	COX5A	19.1745	0	11.6395	43.3777	1.52457	0.560112	hsa_circ_0005725	http://www.circbase.org/cgi-bin/singlerecord.cgi?id=hsa_circ_0005725
hsa_circ:chr15:75687021-75688837	SIN3A	0	0	12.6095	0	5.25734	0.273709	hsa_circ_0007103	http://www.circbase.org/cgi-bin/singlerecord.cgi?id=hsa_circ_0007103
hsa_circ:chr15:75706546-75715164	SIN3A	18.1653	7.18284	0	0	-6.01238	0.0586792	hsa_circ_0036354	http://www.circbase.org/cgi-bin/singlerecord.cgi?id=hsa_circ_0036354
hsa_circ:chr15:75798016-75819602	ENSG00000260269.1,PTPN9	0	4.78856	0	0	-3.61557	0.453691	hsa_circ_0002966	http://www.circbase.org/cgi-bin/singlerecord.cgi?id=hsa_circ_0002966
hsa_circ:chr15:75809600-75816639	PTPN9	0	0	27.1588	0	6.36302	0.184349	hsa_circ_0002578	http://www.circbase.org/cgi-bin/singlerecord.cgi?id=hsa_circ_0002578
hsa_circ:chr15:75809600-75819602	ENSG00000260269.1,PTPN9	0	12.7695	8.72963	0	-0.547762	0.905334	hsa_circ_0007595	http://www.circbase.org/cgi-bin/singlerecord.cgi?id=hsa_circ_0007595
hsa_circ:chr15:75815462-75816639	PTPN9	7.06429	0	0	0	-4.16619	0.386659	hsa_circ_0006569	http://www.circbase.org/cgi-bin/singlerecord.cgi?id=hsa_circ_0006569
hsa_circ:chr15:75815462-75819602	ENSG00000260269.1,PTPN9	0	6.38475	0	0	-4.02912	0.402745	hsa_circ_0005559	http://www.circbase.org/cgi-bin/singlerecord.cgi?id=hsa_circ_0005559
hsa_circ:chr15:76152219-76165909	UBE2Q2	0	0	5.81975	5.86185	5.14481	0.241413	NA	NA
hsa_circ:chr15:76168528-76175765	UBE2Q2	12.1102	3.19238	0	0	-5.28392	0.19386	hsa_circ_0005151	http://www.circbase.org/cgi-bin/singlerecord.cgi?id=hsa_circ_0005151
hsa_circ:chr15:76566753-76585041	ETFA	17.1561	0	0	18.7579	0.129024	0.97756	hsa_circ_0006842	http://www.circbase.org/cgi-bin/singlerecord.cgi?id=hsa_circ_0006842
hsa_circ:chr15:76566753-76588078	ETFA	29.2664	13.5676	16.4893	30.4816	0.134465	0.898538	hsa_circ_0000638	http://www.circbase.org/cgi-bin/singlerecord.cgi?id=hsa_circ_0000638
hsa_circ:chr15:76576098-76585041	ETFA	0	62.2513	0	0	-7.31028	0.126805	hsa_circ_0005036	http://www.circbase.org/cgi-bin/singlerecord.cgi?id=hsa_circ_0005036
hsa_circ:chr15:76580187-76585041	ETFA	39.3582	19.9523	0	0	-7.23863	0.000506157	hsa_circ_0000639	http://www.circbase.org/cgi-bin/singlerecord.cgi?id=hsa_circ_0000639
hsa_circ:chr15:76584772-76588078	ETFA	39.3582	36.7123	32.0086	32.8264	-0.230251	0.760923	hsa_circ_0003620	http://www.circbase.org/cgi-bin/singlerecord.cgi?id=hsa_circ_0003620
hsa_circ:chr15:76866499-76958130	SCAPER	0	6.38475	0	0	-4.02912	0.402745	hsa_circ_0006068	http://www.circbase.org/cgi-bin/singlerecord.cgi?id=hsa_circ_0006068
hsa_circ:chr15:77425347-77426092	PEAK1	0	3.19238	0	0	-3.03348	0.531288	NA	NA
hsa_circ:chr15:78337242-78346529	TBC1D2B	12.1102	3.19238	7.75967	3.51711	-0.43301	0.859845	hsa_circ_0036441	http://www.circbase.org/cgi-bin/singlerecord.cgi?id=hsa_circ_0036441
hsa_circ:chr15:78836532-78839040	PSMA4	3.02755	0	4.84979	0	0.695657	0.87963	NA	NA
hsa_circ:chr15:79183331-79186572	MORF4L1	0	0	0	5.86185	4.14518	0.390227	hsa_circ_0036493	http://www.circbase.org/cgi-bin/singlerecord.cgi?id=hsa_circ_0036493
hsa_circ:chr15:80390758-80415142	ZFAND6	5.04592	4.78856	4.84979	0	-1.01079	0.783671	hsa_circ_0000642	http://www.circbase.org/cgi-bin/singlerecord.cgi?id=hsa_circ_0000642
hsa_circ:chr15:80412670-80415142	ZFAND6	52.4776	44.6933	52.3778	57.4462	0.177338	0.768974	hsa_circ_0000643	http://www.circbase.org/cgi-bin/singlerecord.cgi?id=hsa_circ_0000643
hsa_circ:chr15:82443806-82456325	EFL1	0	4.78856	0	0	-3.61557	0.453691	hsa_circ_0036548	http://www.circbase.org/cgi-bin/singlerecord.cgi?id=hsa_circ_0036548
hsa_circ:chr15:83710480-83718930	BTBD1	8.07348	2.39428	0	0	-4.73593	0.290012	hsa_circ_0036586	http://www.circbase.org/cgi-bin/singlerecord.cgi?id=hsa_circ_0036586
hsa_circ:chr15:83710480-83725297	BTBD1	0	20.7504	0	0	-5.72634	0.232309	hsa_circ_0036587	http://www.circbase.org/cgi-bin/singlerecord.cgi?id=hsa_circ_0036587
hsa_circ:chr15:85081763-85089508	UBE2Q2P1	0	0	0	11.7237	5.14754	0.284	NA	NA
hsa_circ:chr15:85081763-85098301	UBE2Q2P1	7.06429	0	0	0	-4.16619	0.386659	NA	NA
hsa_circ:chr15:85223944-85231005	SEC11A	8.07348	0	7.75967	0	-0.0495174	0.991271	hsa_circ_0036598	http://www.circbase.org/cgi-bin/singlerecord.cgi?id=hsa_circ_0036598
hsa_circ:chr15:85223944-85234875	SEC11A	52.4776	30.3276	57.2276	41.033	0.253545	0.709136	hsa_circ_0000647	http://www.circbase.org/cgi-bin/singlerecord.cgi?id=hsa_circ_0000647
hsa_circ:chr15:85607601-85610435	PDE8A	13.1194	0	23.279	7.03422	1.21791	0.622093	hsa_circ_0036610	http://www.circbase.org/cgi-bin/singlerecord.cgi?id=hsa_circ_0036610
hsa_circ:chr15:85657104-85658718	PDE8A	17.1561	0	7.75967	25.7922	0.971788	0.704696	hsa_circ_0003856	http://www.circbase.org/cgi-bin/singlerecord.cgi?id=hsa_circ_0003856
hsa_circ:chr15:86064659-86087186	AKAP13	5.04592	0	0	0	-3.67914	0.445627	hsa_circ_0008454	http://www.circbase.org/cgi-bin/singlerecord.cgi?id=hsa_circ_0008454
hsa_circ:chr15:86076815-86087186	AKAP13	0	3.99047	0	0	-3.3537	0.487777	hsa_circ_0036641	http://www.circbase.org/cgi-bin/singlerecord.cgi?id=hsa_circ_0036641
hsa_circ:chr15:86198648-86199018	AKAP13	0	10.3752	0	0	-4.72779	0.325009	hsa_circ_0008017	http://www.circbase.org/cgi-bin/singlerecord.cgi?id=hsa_circ_0008017
hsa_circ:chr15:89656956-89659752	ABHD2	37.3398	19.1543	25.2189	21.1027	-0.281054	0.767277	hsa_circ_0007099	http://www.circbase.org/cgi-bin/singlerecord.cgi?id=hsa_circ_0007099
hsa_circ:chr15:89790860-89804074	FANCI	4.03674	0	13.5794	0	1.76013	0.694861	hsa_circ_0006779	http://www.circbase.org/cgi-bin/singlerecord.cgi?id=hsa_circ_0006779
hsa_circ:chr15:89807134-89817535	FANCI	5.04592	0	0	0	-3.67914	0.445627	NA	NA
hsa_circ:chr15:89843031-89847146	FANCI	0	0	0	11.7237	5.14754	0.284	hsa_circ_0036710	http://www.circbase.org/cgi-bin/singlerecord.cgi?id=hsa_circ_0036710
hsa_circ:chr15:89863997-89866742	POLG	7.06429	0	0	0	-4.16619	0.386659	NA	NA
hsa_circ:chr15:90137646-90138842	TICRR	16.147	14.3657	16.4893	0	-0.880395	0.693582	hsa_circ_0036730	http://www.circbase.org/cgi-bin/singlerecord.cgi?id=hsa_circ_0036730
hsa_circ:chr15:90280804-90281467	WDR93	0	0	5.81975	0	4.14443	0.390315	NA	NA
hsa_circ:chr15:90431753-90432372	AP3S2,C15orf38-AP3S2	0	5.58666	0	0	-3.83712	0.425951	hsa_circ_0002080	http://www.circbase.org/cgi-bin/singlerecord.cgi?id=hsa_circ_0002080
hsa_circ:chr15:90610342-90611827	ZNF710	7.06429	0	0	0	-4.16619	0.386659	hsa_circ_0004867	http://www.circbase.org/cgi-bin/singlerecord.cgi?id=hsa_circ_0004867
hsa_circ:chr15:90760671-90763123	SEMA4B	0	13.5676	8.72963	15.2408	0.811071	0.723951	hsa_circ_0036763	http://www.circbase.org/cgi-bin/singlerecord.cgi?id=hsa_circ_0036763
hsa_circ:chr15:90760671-90764997	SEMA4B	8.07348	6.38475	13.5794	0	-0.0835968	0.975151	hsa_circ_0000650	http://www.circbase.org/cgi-bin/singlerecord.cgi?id=hsa_circ_0000650
hsa_circ:chr15:90763025-90764997	SEMA4B	0	4.78856	0	0	-3.61557	0.453691	hsa_circ_0036768	http://www.circbase.org/cgi-bin/singlerecord.cgi?id=hsa_circ_0036768
hsa_circ:chr15:90982564-90984916	IQGAP1	4.03674	6.38475	0	0	-4.73212	0.288696	hsa_circ_0036799	http://www.circbase.org/cgi-bin/singlerecord.cgi?id=hsa_circ_0036799
hsa_circ:chr15:90982564-90986710	IQGAP1	0	47.8856	37.8284	0	-0.339934	0.940742	hsa_circ_0000651	http://www.circbase.org/cgi-bin/singlerecord.cgi?id=hsa_circ_0000651
hsa_circ:chr15:90984738-90986710	IQGAP1	16.147	22.3466	26.1889	19.9303	0.259985	0.805842	hsa_circ_0000652	http://www.circbase.org/cgi-bin/singlerecord.cgi?id=hsa_circ_0000652
hsa_circ:chr15:91009233-91009668	IQGAP1	14.1286	15.9619	0	0	-6.26135	0.0314036	hsa_circ_0002450	http://www.circbase.org/cgi-bin/singlerecord.cgi?id=hsa_circ_0002450
hsa_circ:chr15:91030186-91035943	IQGAP1	0	0	3.87984	0	3.56175	0.462171	hsa_circ_0007201	http://www.circbase.org/cgi-bin/singlerecord.cgi?id=hsa_circ_0007201
hsa_circ:chr15:91034565-91035943	IQGAP1	0	9.57713	0	0	-4.61256	0.337098	NA	NA
hsa_circ:chr15:91136868-91150710	CRTC3	0	0	9.69959	0	4.8795	0.310232	hsa_circ_0036850	http://www.circbase.org/cgi-bin/singlerecord.cgi?id=hsa_circ_0036850
hsa_circ:chr15:91489844-91490144	UNC45A	0	3.19238	0	0	-3.03348	0.531288	hsa_circ_0036904	http://www.circbase.org/cgi-bin/singlerecord.cgi?id=hsa_circ_0036904
hsa_circ:chr15:91491026-91492024	UNC45A	0	0	7.75967	0	4.55829	0.343757	NA	NA
hsa_circ:chr15:91522388-91523619	PRC1	7.06429	11.9714	17.4593	0	-0.120003	0.959132	NA	NA
hsa_circ:chr15:93467551-93472321	CHD2	13.1194	35.9142	26.1889	19.9303	-0.0924679	0.928042	hsa_circ_0007262	http://www.circbase.org/cgi-bin/singlerecord.cgi?id=hsa_circ_0007262
hsa_circ:chr15:93510555-93510743	CHD2	8.07348	0	0	0	-4.35935	0.364681	hsa_circ_0004842	http://www.circbase.org/cgi-bin/singlerecord.cgi?id=hsa_circ_0004842
hsa_circ:chr15:93521464-93522513	CHD2	0	0	17.4593	0	5.72619	0.232696	hsa_circ_0036988	http://www.circbase.org/cgi-bin/singlerecord.cgi?id=hsa_circ_0036988
hsa_circ:chr15:93540187-93541851	CHD2	32.2939	23.9428	50.4379	26.9645	0.467025	0.564962	hsa_circ_0000655	http://www.circbase.org/cgi-bin/singlerecord.cgi?id=hsa_circ_0000655
hsa_circ:chr15:93540187-93545547	CHD2	0	12.7695	11.6395	10.5513	0.788906	0.740545	hsa_circ_0036997	http://www.circbase.org/cgi-bin/singlerecord.cgi?id=hsa_circ_0036997
hsa_circ:chr15:93543742-93558139	CHD2	0	7.18284	7.75967	0	0.110863	0.978563	hsa_circ_0037002	http://www.circbase.org/cgi-bin/singlerecord.cgi?id=hsa_circ_0037002
hsa_circ:chr15:93547847-93552553	CHD2	0	7.98094	0	0	-4.35014	0.36571	NA	NA
hsa_circ:chr15:93547847-93558139	CHD2	0	0	2.90988	0	3.1489	0.517345	hsa_circ_0003783	http://www.circbase.org/cgi-bin/singlerecord.cgi?id=hsa_circ_0003783
hsa_circ:chr15:93552375-93552553	CHD2	2.01837	0	0	0	-2.34908	0.630393	hsa_circ_0037004	http://www.circbase.org/cgi-bin/singlerecord.cgi?id=hsa_circ_0037004
hsa_circ:chr15:93557926-93558139	CHD2	0	0	2.90988	3.51711	4.28235	0.351958	hsa_circ_0037007	http://www.circbase.org/cgi-bin/singlerecord.cgi?id=hsa_circ_0037007
hsa_circ:chr15:94841430-94841959	MCTP2	11.101	17.5581	7.75967	10.5513	-0.649898	0.6963	hsa_circ_0000657	http://www.circbase.org/cgi-bin/singlerecord.cgi?id=hsa_circ_0000657
hsa_circ:chr15:94841430-94858866	MCTP2	0	0	4.84979	0	3.88232	0.42174	NA	NA
hsa_circ:chr15:94899366-94928754	MCTP2	2.01837	0	11.6395	0	2.54724	0.553836	NA	NA
hsa_circ:chr15:99250791-99251336	IGF1R	7.06429	0	8.72963	0	0.313193	0.944764	hsa_circ_0005035	http://www.circbase.org/cgi-bin/singlerecord.cgi?id=hsa_circ_0005035
hsa_circ:chr15:99434554-99442850	IGF1R	9.08266	0	3.87984	0	-1.21524	0.779897	hsa_circ_0037026	http://www.circbase.org/cgi-bin/singlerecord.cgi?id=hsa_circ_0037026
hsa_circ:chr16:1004357-1004666	LMF1	15.1378	22.3466	30.0687	52.7567	1.13685	0.190197	hsa_circ_0007701	http://www.circbase.org/cgi-bin/singlerecord.cgi?id=hsa_circ_0007701
hsa_circ:chr16:981642-1004666	LMF1	5.04592	0	0	0	-3.67914	0.445627	hsa_circ_0037274	http://www.circbase.org/cgi-bin/singlerecord.cgi?id=hsa_circ_0037274
hsa_circ:chr16:11096931-11118778	CLEC16A	0	0	6.78971	0	4.36615	0.364903	hsa_circ_0005656	http://www.circbase.org/cgi-bin/singlerecord.cgi?id=hsa_circ_0005656
hsa_circ:chr16:11114050-11118778	CLEC16A	57.5235	28.7314	33.9486	36.3435	-0.29122	0.695012	hsa_circ_0006836	http://www.circbase.org/cgi-bin/singlerecord.cgi?id=hsa_circ_0006836
hsa_circ:chr16:11114050-11145498	CLEC16A	20.1837	42.299	26.1889	0	-1.25134	0.613739	hsa_circ_0002086	http://www.circbase.org/cgi-bin/singlerecord.cgi?id=hsa_circ_0002086
hsa_circ:chr16:11114050-11154879	CLEC16A	22.2021	48.6837	46.558	50.4119	0.445223	0.537031	hsa_circ_0000672	http://www.circbase.org/cgi-bin/singlerecord.cgi?id=hsa_circ_0000672
hsa_circ:chr16:11114050-11220003	CLEC16A	10.0918	43.8952	28.1288	0	-0.938542	0.722998	hsa_circ_0007846	http://www.circbase.org/cgi-bin/singlerecord.cgi?id=hsa_circ_0007846
hsa_circ:chr16:11214472-11217803	CLEC16A	7.06429	0	6.78971	0	-0.0472871	0.991138	hsa_circ_0037852	http://www.circbase.org/cgi-bin/singlerecord.cgi?id=hsa_circ_0037852
hsa_circ:chr16:11214472-11220003	CLEC16A	13.1194	20.7504	18.4292	7.03422	-0.408482	0.772874	hsa_circ_0002988	http://www.circbase.org/cgi-bin/singlerecord.cgi?id=hsa_circ_0002988
hsa_circ:chr16:11217599-11217803	CLEC16A	0	2.39428	8.72963	0	1.8571	0.677527	hsa_circ_0037855	http://www.circbase.org/cgi-bin/singlerecord.cgi?id=hsa_circ_0037855
hsa_circ:chr16:11647389-11650591	LITAF	0	7.98094	0	0	-4.35014	0.36571	hsa_circ_0037858	http://www.circbase.org/cgi-bin/singlerecord.cgi?id=hsa_circ_0037858
hsa_circ:chr16:11815433-11830089	TXNDC11	0	22.3466	14.5494	0	-0.618425	0.892776	hsa_circ_0009128	http://www.circbase.org/cgi-bin/singlerecord.cgi?id=hsa_circ_0009128
hsa_circ:chr16:11824501-11830089	TXNDC11	6.05511	0	0	0	-3.94312	0.413042	hsa_circ_0006559	http://www.circbase.org/cgi-bin/singlerecord.cgi?id=hsa_circ_0006559
hsa_circ:chr16:11857334-11859541	ZC3H7A	5.04592	0	0	0	-3.67914	0.445627	hsa_circ_0003769	http://www.circbase.org/cgi-bin/singlerecord.cgi?id=hsa_circ_0003769
hsa_circ:chr16:11873022-11876244	ZC3H7A	0	0	0	23.4474	6.14873	0.199699	hsa_circ_0005420	http://www.circbase.org/cgi-bin/singlerecord.cgi?id=hsa_circ_0005420
hsa_circ:chr16:11935552-11935857	RSL1D1	0	0	2.90988	0	3.1489	0.517345	hsa_circ_0037887	http://www.circbase.org/cgi-bin/singlerecord.cgi?id=hsa_circ_0037887
hsa_circ:chr16:11935552-11941663	RSL1D1	0	4.78856	0	0	-3.61557	0.453691	NA	NA
hsa_circ:chr16:11940358-11940700	RSL1D1	20.1837	16.76	32.0086	21.1027	0.527501	0.604217	hsa_circ_0000673	http://www.circbase.org/cgi-bin/singlerecord.cgi?id=hsa_circ_0000673
hsa_circ:chr16:11940358-11941663	RSL1D1	23.2112	27.9333	20.3691	0	-1.32296	0.568955	hsa_circ_0006979	http://www.circbase.org/cgi-bin/singlerecord.cgi?id=hsa_circ_0006979
hsa_circ:chr16:11988811-11990639	GSPT1	0	7.98094	13.5794	0	0.765192	0.868043	hsa_circ_0037910	http://www.circbase.org/cgi-bin/singlerecord.cgi?id=hsa_circ_0037910
hsa_circ:chr16:12145704-12146079	SNX29	0	0	0	9.37896	4.82502	0.315758	NA	NA
hsa_circ:chr16:1364021-1370518	ENSG00000261505.1,UBE2I	0	11.1733	0	0	-4.8345	0.314073	hsa_circ_0000665	http://www.circbase.org/cgi-bin/singlerecord.cgi?id=hsa_circ_0000665
hsa_circ:chr16:138697-150507	NPRL3	0	0	0	15.2408	5.5266	0.249579	NA	NA
hsa_circ:chr16:1420131-1421612	UNKL	9.08266	0	0	0	-4.52967	0.345973	NA	NA
hsa_circ:chr16:1447179-1453345	UNKL	12.1102	0	0	0	-4.94551	0.30296	hsa_circ_0002445	http://www.circbase.org/cgi-bin/singlerecord.cgi?id=hsa_circ_0002445
hsa_circ:chr16:14687158-14698083	PARN	16.147	20.7504	0	23.4474	-0.658662	0.789723	hsa_circ_0005627	http://www.circbase.org/cgi-bin/singlerecord.cgi?id=hsa_circ_0005627
hsa_circ:chr16:14738131-14738466	BFAR	16.147	24.7409	15.5193	0	-1.39054	0.531365	hsa_circ_0009065	http://www.circbase.org/cgi-bin/singlerecord.cgi?id=hsa_circ_0009065
hsa_circ:chr16:14738131-14749067	BFAR	0	0	0	3.51711	3.40518	0.482694	NA	NA
hsa_circ:chr16:148143-150507	NPRL3	22.2021	10.3752	11.6395	16.4132	-0.213862	0.876461	hsa_circ_0037130	http://www.circbase.org/cgi-bin/singlerecord.cgi?id=hsa_circ_0037130
hsa_circ:chr16:15091610-15092262	PDXDC1	0	38.3085	0	0	-6.61017	0.167577	hsa_circ_0038005	http://www.circbase.org/cgi-bin/singlerecord.cgi?id=hsa_circ_0038005
hsa_circ:chr16:15100251-15103616	PDXDC1	0	0	3.87984	0	3.56175	0.462171	hsa_circ_0038008	http://www.circbase.org/cgi-bin/singlerecord.cgi?id=hsa_circ_0038008
hsa_circ:chr16:1552048-1552762	TELO2	15.1378	0	0	0	-5.26792	0.272203	NA	NA
hsa_circ:chr16:1555411-1557717	TELO2	0	3.19238	6.78971	0	1.08359	0.809984	NA	NA
hsa_circ:chr16:15714308-15715768	KIAA0430	2.01837	0	0	0	-2.34908	0.630393	hsa_circ_0038047	http://www.circbase.org/cgi-bin/singlerecord.cgi?id=hsa_circ_0038047
hsa_circ:chr16:15758593-15761296	NDE1	18.1653	0	0	0	-5.53127	0.24874	hsa_circ_0038054	http://www.circbase.org/cgi-bin/singlerecord.cgi?id=hsa_circ_0038054
hsa_circ:chr16:15785001-15790717	NDE1	6.05511	19.1543	15.5193	0	-0.694716	0.75258	hsa_circ_0038062	http://www.circbase.org/cgi-bin/singlerecord.cgi?id=hsa_circ_0038062
hsa_circ:chr16:15788022-15790717	NDE1	0	14.3657	0	10.5513	-0.449971	0.922066	hsa_circ_0038063	http://www.circbase.org/cgi-bin/singlerecord.cgi?id=hsa_circ_0038063
hsa_circ:chr16:15973661-15978062	FOPNL	14.1286	0	0	0	-5.16819	0.275043	hsa_circ_0003349	http://www.circbase.org/cgi-bin/singlerecord.cgi?id=hsa_circ_0003349
hsa_circ:chr16:16108348-16110478	ABCC1	0	7.18284	10.6695	12.8961	1.70037	0.501005	hsa_circ_0038085	http://www.circbase.org/cgi-bin/singlerecord.cgi?id=hsa_circ_0038085
hsa_circ:chr16:16110353-16130460	ABCC1	6.05511	0	0	3.51711	-0.786859	0.862596	hsa_circ_0038091	http://www.circbase.org/cgi-bin/singlerecord.cgi?id=hsa_circ_0038091
hsa_circ:chr16:16126966-16150152	ABCC1	0	0	7.75967	0	4.55829	0.343757	hsa_circ_0038095	http://www.circbase.org/cgi-bin/singlerecord.cgi?id=hsa_circ_0038095
hsa_circ:chr16:16146581-16150152	ABCC1	11.101	23.1447	13.5794	44.5501	0.753019	0.485883	hsa_circ_0038111	http://www.circbase.org/cgi-bin/singlerecord.cgi?id=hsa_circ_0038111
hsa_circ:chr16:16149949-16173335	ABCC1	0	4.78856	0	0	-3.61557	0.453691	NA	NA
hsa_circ:chr16:16165499-16173335	ABCC1	8.07348	12.7695	6.78971	0	-1.60714	0.547987	NA	NA
hsa_circ:chr16:16180681-16184445	ABCC1	0	15.1638	27.1588	23.4474	1.73086	0.44347	hsa_circ_0008120	http://www.circbase.org/cgi-bin/singlerecord.cgi?id=hsa_circ_0008120
hsa_circ:chr16:16180681-16196574	ABCC1	14.1286	15.1638	0	0	-6.22248	0.0347906	hsa_circ_0038132	http://www.circbase.org/cgi-bin/singlerecord.cgi?id=hsa_circ_0038132
hsa_circ:chr16:16200595-16205439	ABCC1	17.1561	14.3657	10.6695	0	-1.5501	0.460735	hsa_circ_0008255	http://www.circbase.org/cgi-bin/singlerecord.cgi?id=hsa_circ_0008255
hsa_circ:chr16:16205232-16205439	ABCC1	7.06429	0	0	0	-4.16619	0.386659	hsa_circ_0038138	http://www.circbase.org/cgi-bin/singlerecord.cgi?id=hsa_circ_0038138
hsa_circ:chr16:16208623-16208933	ABCC1	0	0	0	8.20659	4.63195	0.335868	NA	NA
hsa_circ:chr16:16215832-16219768	ABCC1	0	0	0	4.68948	3.8221	0.429169	hsa_circ_0000678	http://www.circbase.org/cgi-bin/singlerecord.cgi?id=hsa_circ_0000678
hsa_circ:chr16:16218646-16219768	ABCC1	16.147	31.1257	6.78971	0	-2.77552	0.116699	hsa_circ_0000679	http://www.circbase.org/cgi-bin/singlerecord.cgi?id=hsa_circ_0000679
hsa_circ:chr16:16225646-16228365	ABCC1	0	0	8.72963	0	4.72782	0.325779	NA	NA
hsa_circ:chr16:1675974-1682366	CRAMP1,ENSG00000226890.1	0	0	14.5494	0	5.46349	0.255095	hsa_circ_0005606	http://www.circbase.org/cgi-bin/singlerecord.cgi?id=hsa_circ_0005606
hsa_circ:chr16:1675974-1687908	CRAMP1,ENSG00000226890.1	0	9.57713	0	0	-4.61256	0.337098	NA	NA
hsa_circ:chr16:1675974-1691188	CRAMP1,ENSG00000226890.1	0	9.57713	9.69959	19.9303	1.61496	0.466736	hsa_circ_0003592	http://www.circbase.org/cgi-bin/singlerecord.cgi?id=hsa_circ_0003592
hsa_circ:chr16:1774558-1779579	MAPK8IP3	32.2939	38.3085	12.6095	30.4816	-0.720174	0.428883	hsa_circ_0008480	http://www.circbase.org/cgi-bin/singlerecord.cgi?id=hsa_circ_0008480
hsa_circ:chr16:1797030-1798721	MAPK8IP3	0	12.7695	6.78971	9.37896	0.332617	0.899975	hsa_circ_0000666	http://www.circbase.org/cgi-bin/singlerecord.cgi?id=hsa_circ_0000666
hsa_circ:chr16:1866894-1873038	HAGH	0	5.58666	0	0	-3.83712	0.425951	hsa_circ_0007865	http://www.circbase.org/cgi-bin/singlerecord.cgi?id=hsa_circ_0007865
hsa_circ:chr16:1872301-1873038	HAGH	18.1653	2.39428	8.72963	24.6198	0.703442	0.66599	hsa_circ_0037353	http://www.circbase.org/cgi-bin/singlerecord.cgi?id=hsa_circ_0037353
hsa_circ:chr16:18809247-18810156	ARL6IP1	86.7899	46.2894	58.1975	44.5501	-0.366882	0.539738	hsa_circ_0004833	http://www.circbase.org/cgi-bin/singlerecord.cgi?id=hsa_circ_0004833
hsa_circ:chr16:18826497-18830976	SMG1	0	0	0	8.20659	4.63195	0.335868	hsa_circ_0038241	http://www.circbase.org/cgi-bin/singlerecord.cgi?id=hsa_circ_0038241
hsa_circ:chr16:18851020-18851268	SMG1	0	0	3.87984	0	3.56175	0.462171	hsa_circ_0006976	http://www.circbase.org/cgi-bin/singlerecord.cgi?id=hsa_circ_0006976
hsa_circ:chr16:18851020-18853776	SMG1	0	7.98094	12.6095	0	0.658437	0.886274	hsa_circ_0008216	http://www.circbase.org/cgi-bin/singlerecord.cgi?id=hsa_circ_0008216
hsa_circ:chr16:18852887-18856973	SMG1	8.07348	0	0	0	-4.35935	0.364681	hsa_circ_0006434	http://www.circbase.org/cgi-bin/singlerecord.cgi?id=hsa_circ_0006434
hsa_circ:chr16:19049196-19051768	TMC7	0	2.39428	0	0	-2.6212	0.590064	hsa_circ_0038312	http://www.circbase.org/cgi-bin/singlerecord.cgi?id=hsa_circ_0038312
hsa_circ:chr16:19451282-19452148	TMC5	0	0	1.93992	0	2.56807	0.600374	NA	NA
hsa_circ:chr16:19474602-19475346	TMC5	0	4.78856	0	0	-3.61557	0.453691	NA	NA
hsa_circ:chr16:19477404-19481147	TMC5	0	6.38475	0	0	-4.02912	0.402745	NA	NA
hsa_circ:chr16:19488762-19492787	TMC5	0	0	11.6395	3.51711	5.522	0.176347	NA	NA
hsa_circ:chr16:19501717-19505688	TMC5	5.04592	0	0	0	-3.67914	0.445627	NA	NA
hsa_circ:chr16:19627436-19663412	C16orf62	0	0	7.75967	0	4.55829	0.343757	hsa_circ_0005699	http://www.circbase.org/cgi-bin/singlerecord.cgi?id=hsa_circ_0005699
hsa_circ:chr16:19639016-19640075	C16orf62	5.04592	0	0	0	-3.67914	0.445627	NA	NA
hsa_circ:chr16:19656208-19663412	C16orf62	21.1929	0	0	22.275	0.0720098	0.987463	hsa_circ_0003645	http://www.circbase.org/cgi-bin/singlerecord.cgi?id=hsa_circ_0003645
hsa_circ:chr16:19680482-19693712	C16orf62	0	0	2.90988	0	3.1489	0.517345	hsa_circ_0038370	http://www.circbase.org/cgi-bin/singlerecord.cgi?id=hsa_circ_0038370
hsa_circ:chr16:19745020-19746772	IQCK	0	5.58666	0	0	-3.83712	0.425951	hsa_circ_0038376	http://www.circbase.org/cgi-bin/singlerecord.cgi?id=hsa_circ_0038376
hsa_circ:chr16:19775170-19775434	IQCK	10.0918	0	0	0	-4.682	0.329779	hsa_circ_0004049	http://www.circbase.org/cgi-bin/singlerecord.cgi?id=hsa_circ_0004049
hsa_circ:chr16:2115520-2130378	TSC2	0	7.18284	0	0	-4.19854	0.382922	NA	NA
hsa_circ:chr16:2122985-2124141	TSC2	0	0	3.87984	0	3.56175	0.462171	NA	NA
hsa_circ:chr16:2125800-2130378	TSC2	22.2021	3.19238	10.6695	28.1369	0.61738	0.667758	NA	NA
hsa_circ:chr16:21809071-21812158	RRN3P1	0	7.18284	0	0	-4.19854	0.382922	NA	NA
hsa_circ:chr16:21973781-21983443	UQCRC2	0	7.18284	0	0	-4.19854	0.382922	hsa_circ_0038465	http://www.circbase.org/cgi-bin/singlerecord.cgi?id=hsa_circ_0038465
hsa_circ:chr16:21982846-21987564	UQCRC2	18.1653	0	0	0	-5.53127	0.24874	hsa_circ_0007040	http://www.circbase.org/cgi-bin/singlerecord.cgi?id=hsa_circ_0007040
hsa_circ:chr16:22236975-22237296	EEF2K	59.5419	0	31.0387	38.6882	0.229029	0.935769	hsa_circ_0038487	http://www.circbase.org/cgi-bin/singlerecord.cgi?id=hsa_circ_0038487
hsa_circ:chr16:22260076-22262643	EEF2K	23.2112	13.5676	32.9786	21.1027	0.562889	0.583195	hsa_circ_0008284	http://www.circbase.org/cgi-bin/singlerecord.cgi?id=hsa_circ_0008284
hsa_circ:chr16:22319469-22320831	POLR3E	0	0	7.75967	0	4.55829	0.343757	hsa_circ_0038508	http://www.circbase.org/cgi-bin/singlerecord.cgi?id=hsa_circ_0038508
hsa_circ:chr16:22360600-22361170	CDR2	20.1837	19.1543	21.3391	18.7579	0.0287342	0.9791	hsa_circ_0004682	http://www.circbase.org/cgi-bin/singlerecord.cgi?id=hsa_circ_0004682
hsa_circ:chr16:23091267-23093878	USP31	26.2388	6.38475	11.6395	0	-1.47518	0.523935	hsa_circ_0003704	http://www.circbase.org/cgi-bin/singlerecord.cgi?id=hsa_circ_0003704
hsa_circ:chr16:23113640-23119504	USP31	0	7.98094	4.84979	0	-0.716321	0.868959	hsa_circ_0008498	http://www.circbase.org/cgi-bin/singlerecord.cgi?id=hsa_circ_0008498
hsa_circ:chr16:2312279-2313288	RNPS1	12.1102	27.1352	24.249	0	-0.691535	0.7793	hsa_circ_0007275	http://www.circbase.org/cgi-bin/singlerecord.cgi?id=hsa_circ_0007275
hsa_circ:chr16:23424769-23428442	COG7	7.06429	4.78856	2.90988	28.1369	1.38748	0.467291	hsa_circ_0002902	http://www.circbase.org/cgi-bin/singlerecord.cgi?id=hsa_circ_0002902
hsa_circ:chr16:23428288-23430148	COG7	0	0	4.84979	0	3.88232	0.42174	NA	NA
hsa_circ:chr16:23494244-23498111	GGA2	15.1378	0	17.4593	0	0.209508	0.963591	hsa_circ_0003840	http://www.circbase.org/cgi-bin/singlerecord.cgi?id=hsa_circ_0003840
hsa_circ:chr16:23540823-23541218	EARS2	0	16.76	0	0	-5.41857	0.2586	hsa_circ_0038608	http://www.circbase.org/cgi-bin/singlerecord.cgi?id=hsa_circ_0038608
hsa_circ:chr16:23543978-23563625	EARS2	7.06429	0	14.5494	0	1.04853	0.819994	hsa_circ_0038610	http://www.circbase.org/cgi-bin/singlerecord.cgi?id=hsa_circ_0038610
hsa_circ:chr16:23632683-23634451	PALB2	8.07348	5.58666	0	0	-5.12124	0.22565	hsa_circ_0005582	http://www.circbase.org/cgi-bin/singlerecord.cgi?id=hsa_circ_0005582
hsa_circ:chr16:23632683-23637718	PALB2	5.04592	6.38475	0	0	-4.86508	0.269322	NA	NA
hsa_circ:chr16:23654276-23672602	DCTN5	0	7.18284	0	0	-4.19854	0.382922	hsa_circ_0008867	http://www.circbase.org/cgi-bin/singlerecord.cgi?id=hsa_circ_0008867
hsa_circ:chr16:242926-249237	LUC7L	0	10.3752	0	0	-4.72779	0.325009	NA	NA
hsa_circ:chr16:24788254-24788679	TNRC6A	0	4.78856	0	22.275	2.21034	0.63202	hsa_circ_0038673	http://www.circbase.org/cgi-bin/singlerecord.cgi?id=hsa_circ_0038673
hsa_circ:chr16:2489354-2493801	CCNF	12.1102	13.5676	22.3091	22.275	0.795066	0.509141	hsa_circ_0004603	http://www.circbase.org/cgi-bin/singlerecord.cgi?id=hsa_circ_0004603
hsa_circ:chr16:2489354-2495623	CCNF	0	9.57713	0	0	-4.61256	0.337098	hsa_circ_0037527	http://www.circbase.org/cgi-bin/singlerecord.cgi?id=hsa_circ_0037527
hsa_circ:chr16:249061-258187	LUC7L	14.1286	0	12.6095	7.03422	0.484333	0.8441	hsa_circ_0005648	http://www.circbase.org/cgi-bin/singlerecord.cgi?id=hsa_circ_0005648
hsa_circ:chr16:249061-270746	LUC7L	0	6.38475	0	0	-4.02912	0.402745	hsa_circ_0006663	http://www.circbase.org/cgi-bin/singlerecord.cgi?id=hsa_circ_0006663
hsa_circ:chr16:24953308-24966051	ARHGAP17	3.02755	7.98094	0	0	-4.81186	0.278744	NA	NA
hsa_circ:chr16:24979672-24981901	ARHGAP17	0	2.39428	0	0	-2.6212	0.590064	hsa_circ_0004260	http://www.circbase.org/cgi-bin/singlerecord.cgi?id=hsa_circ_0004260
hsa_circ:chr16:2498856-2499916	CCNF	20.1837	7.98094	6.78971	9.37896	-0.799347	0.649879	hsa_circ_0037533	http://www.circbase.org/cgi-bin/singlerecord.cgi?id=hsa_circ_0037533
hsa_circ:chr16:25264267-25266713	ZKSCAN2	8.07348	0	0	10.5513	0.387161	0.933079	hsa_circ_0038702	http://www.circbase.org/cgi-bin/singlerecord.cgi?id=hsa_circ_0038702
hsa_circ:chr16:256003-270746	LUC7L	3.02755	0	0	14.0684	2.2243	0.619402	NA	NA
hsa_circ:chr16:2627426-2636894	PDPK1	0	0	6.78971	0	4.36615	0.364903	NA	NA
hsa_circ:chr16:27224906-27226329	ENSG00000259940.1,KDM8	0	8.77903	11.6395	9.37896	1.24944	0.628218	hsa_circ_0038704	http://www.circbase.org/cgi-bin/singlerecord.cgi?id=hsa_circ_0038704
hsa_circ:chr16:27351507-27357939	IL4R	2.01837	0	0	0	-2.34908	0.630393	NA	NA
hsa_circ:chr16:27544612-27556844	GTF3C1	0	3.19238	0	0	-3.03348	0.531288	hsa_circ_0038758	http://www.circbase.org/cgi-bin/singlerecord.cgi?id=hsa_circ_0038758
hsa_circ:chr16:27712910-27720241	KIAA0556	10.0918	0	0	0	-4.682	0.329779	hsa_circ_0008052	http://www.circbase.org/cgi-bin/singlerecord.cgi?id=hsa_circ_0008052
hsa_circ:chr16:27760905-27761627	KIAA0556	0	0	5.81975	0	4.14443	0.390315	NA	NA
hsa_circ:chr16:27760905-27763245	KIAA0556	0	0	6.78971	0	4.36615	0.364903	NA	NA
hsa_circ:chr16:2806335-2807946	SRRM2	6.05511	3.99047	0	0	-4.67764	0.295931	hsa_circ_0037558	http://www.circbase.org/cgi-bin/singlerecord.cgi?id=hsa_circ_0037558
hsa_circ:chr16:2807473-2807946	SRRM2	3.02755	0	16.4893	12.8961	3.31168	0.180897	hsa_circ_0037561	http://www.circbase.org/cgi-bin/singlerecord.cgi?id=hsa_circ_0037561
hsa_circ:chr16:2807473-2810500	SRRM2	0	0	0	5.86185	4.14518	0.390227	hsa_circ_0037563	http://www.circbase.org/cgi-bin/singlerecord.cgi?id=hsa_circ_0037563
hsa_circ:chr16:28112779-28113266	XPO6	19.1745	48.6837	36.8584	21.1027	-0.229117	0.794149	hsa_circ_0038773	http://www.circbase.org/cgi-bin/singlerecord.cgi?id=hsa_circ_0038773
hsa_circ:chr16:28123138-28137169	XPO6	6.05511	11.9714	0	0	-5.5229	0.1392	hsa_circ_0006012	http://www.circbase.org/cgi-bin/singlerecord.cgi?id=hsa_circ_0006012
hsa_circ:chr16:28137010-28157524	XPO6	3.02755	0	0	0	-2.93848	0.544567	hsa_circ_0038807	http://www.circbase.org/cgi-bin/singlerecord.cgi?id=hsa_circ_0038807
hsa_circ:chr16:28143655-28167848	XPO6	0	2.39428	0	0	-2.6212	0.590064	hsa_circ_0038810	http://www.circbase.org/cgi-bin/singlerecord.cgi?id=hsa_circ_0038810
hsa_circ:chr16:28163980-28167848	XPO6	0	0	3.87984	11.7237	5.5611	0.167273	hsa_circ_0007807	http://www.circbase.org/cgi-bin/singlerecord.cgi?id=hsa_circ_0007807
hsa_circ:chr16:28177829-28181230	XPO6	10.0918	10.3752	0	8.20659	-1.32898	0.614393	hsa_circ_0008223	http://www.circbase.org/cgi-bin/singlerecord.cgi?id=hsa_circ_0008223
hsa_circ:chr16:28498777-28500707	CLN3	10.0918	8.77903	0	0	-5.58777	0.124803	hsa_circ_0004510	http://www.circbase.org/cgi-bin/singlerecord.cgi?id=hsa_circ_0004510
hsa_circ:chr16:28970038-28970421	NFATC2IP	13.1194	4.78856	11.6395	5.86185	-0.0265196	0.98972	hsa_circ_0038883	http://www.circbase.org/cgi-bin/singlerecord.cgi?id=hsa_circ_0038883
hsa_circ:chr16:28990476-28993866	ENSG00000261067.2,SPNS1	0	7.18284	0	0	-4.19854	0.382922	hsa_circ_0004523	http://www.circbase.org/cgi-bin/singlerecord.cgi?id=hsa_circ_0004523
hsa_circ:chr16:29576672-29580649	SMG1P2	12.1102	0	0	0	-4.94551	0.30296	hsa_circ_0038916	http://www.circbase.org/cgi-bin/singlerecord.cgi?id=hsa_circ_0038916
hsa_circ:chr16:29820861-29821085	MAZ	68.6246	34.318	36.8584	98.4791	0.394718	0.628403	NA	NA
hsa_circ:chr16:29845054-29845387	MVP	0	24.7409	20.3691	22.275	0.781181	0.75163	hsa_circ_0000688	http://www.circbase.org/cgi-bin/singlerecord.cgi?id=hsa_circ_0000688
hsa_circ:chr16:29845054-29847119	MVP	0	3.19238	4.84979	0	0.599937	0.895653	hsa_circ_0003864	http://www.circbase.org/cgi-bin/singlerecord.cgi?id=hsa_circ_0003864
hsa_circ:chr16:29847025-29848279	MVP	6.05511	0	0	0	-3.94312	0.413042	hsa_circ_0007258	http://www.circbase.org/cgi-bin/singlerecord.cgi?id=hsa_circ_0007258
hsa_circ:chr16:29906580-29907181	SEZ6L2	17.1561	0	31.0387	11.7237	1.32446	0.598462	hsa_circ_0008535	http://www.circbase.org/cgi-bin/singlerecord.cgi?id=hsa_circ_0008535
hsa_circ:chr16:30676036-30676722	FBRS	0	0	0	4.68948	3.8221	0.429169	NA	NA
hsa_circ:chr16:30715385-30715636	SRCAP	64.5878	64.6456	54.3177	63.308	-0.137086	0.80198	hsa_circ_0039076	http://www.circbase.org/cgi-bin/singlerecord.cgi?id=hsa_circ_0039076
hsa_circ:chr16:30718504-30719033	SRCAP	0	0	6.78971	8.20659	5.50494	0.177256	NA	NA
hsa_circ:chr16:30727387-30727800	SRCAP	0	0	12.6095	0	5.25734	0.273709	NA	NA
hsa_circ:chr16:30740287-30740893	SRCAP	122.111	114.127	109.605	78.5488	-0.324945	0.445201	hsa_circ_0006127	http://www.circbase.org/cgi-bin/singlerecord.cgi?id=hsa_circ_0006127
hsa_circ:chr16:30740287-30745329	SRCAP	0	0	0	10.5513	4.99527	0.298708	hsa_circ_0004236	http://www.circbase.org/cgi-bin/singlerecord.cgi?id=hsa_circ_0004236
hsa_circ:chr16:30744601-30745329	SRCAP	0	0	9.69959	8.20659	5.7613	0.123752	hsa_circ_0039107	http://www.circbase.org/cgi-bin/singlerecord.cgi?id=hsa_circ_0039107
hsa_circ:chr16:30767503-30767841	PHKG2	0	0	9.69959	0	4.8795	0.310232	NA	NA
hsa_circ:chr16:30783154-30783511	RNF40	0	0	0	14.0684	5.41091	0.253109	NA	NA
hsa_circ:chr16:30980626-30981010	SETD1A	0	0	0	7.03422	4.409	0.360117	NA	NA
hsa_circ:chr16:31308835-31309275	ITGAM	5.04592	0	0	0	-3.67914	0.445627	hsa_circ_0000692	http://www.circbase.org/cgi-bin/singlerecord.cgi?id=hsa_circ_0000692
hsa_circ:chr16:31733947-31734674	ZNF720	55.5052	0	0	0	-7.14377	0.135718	hsa_circ_0007059	http://www.circbase.org/cgi-bin/singlerecord.cgi?id=hsa_circ_0007059
hsa_circ:chr16:343488-364683	AXIN1	0	0	2.90988	0	3.1489	0.517345	NA	NA
hsa_circ:chr16:347056-348251	AXIN1	13.1194	19.9523	21.3391	14.0684	0.0981597	0.936894	hsa_circ_0004947	http://www.circbase.org/cgi-bin/singlerecord.cgi?id=hsa_circ_0004947
hsa_circ:chr16:3526222-3529600	NAA60	10.0918	7.18284	0	0	-5.45998	0.151884	hsa_circ_0007763	http://www.circbase.org/cgi-bin/singlerecord.cgi?id=hsa_circ_0007763
hsa_circ:chr16:354304-364683	AXIN1	135.231	134.08	116.395	0	-1.20959	0.678062	hsa_circ_0037158	http://www.circbase.org/cgi-bin/singlerecord.cgi?id=hsa_circ_0037158
hsa_circ:chr16:354304-397106	AXIN1	16.147	9.57713	17.4593	0	-0.551433	0.810433	hsa_circ_0003617	http://www.circbase.org/cgi-bin/singlerecord.cgi?id=hsa_circ_0003617
hsa_circ:chr16:3554720-3562478	CLUAP1,ENSG00000263212.2	0	0	0	8.20659	4.63195	0.335868	hsa_circ_0037602	http://www.circbase.org/cgi-bin/singlerecord.cgi?id=hsa_circ_0037602
hsa_circ:chr16:3556331-3562478	CLUAP1,ENSG00000263212.2	0	2.39428	0	0	-2.6212	0.590064	hsa_circ_0008066	http://www.circbase.org/cgi-bin/singlerecord.cgi?id=hsa_circ_0008066
hsa_circ:chr16:3724340-3726146	TRAP1	0	0	0	17.5856	5.7333	0.232111	hsa_circ_0037641	http://www.circbase.org/cgi-bin/singlerecord.cgi?id=hsa_circ_0037641
hsa_circ:chr16:3729720-3740986	TRAP1	0	0	9.69959	0	4.8795	0.310232	NA	NA
hsa_circ:chr16:3735997-3740986	TRAP1	0	0	0	14.0684	5.41091	0.253109	hsa_circ_0037650	http://www.circbase.org/cgi-bin/singlerecord.cgi?id=hsa_circ_0037650
hsa_circ:chr16:3786037-3795355	CREBBP	0	12.7695	0	0	-5.02682	0.294991	NA	NA
hsa_circ:chr16:3789579-3795355	CREBBP	14.1286	7.98094	15.5193	0	-0.50173	0.826663	hsa_circ_0037654	http://www.circbase.org/cgi-bin/singlerecord.cgi?id=hsa_circ_0037654
hsa_circ:chr16:3841982-3843627	CREBBP	8.07348	9.57713	0	0	-5.49178	0.144927	NA	NA
hsa_circ:chr16:3900298-3901010	CREBBP	250.278	262.573	235.7	216.889	-0.180055	0.543887	hsa_circ_0007637	http://www.circbase.org/cgi-bin/singlerecord.cgi?id=hsa_circ_0007637
hsa_circ:chr16:396148-397106	AXIN1	17.1561	15.1638	12.6095	17.5856	-0.0992979	0.940063	hsa_circ_0005838	http://www.circbase.org/cgi-bin/singlerecord.cgi?id=hsa_circ_0005838
hsa_circ:chr16:4029117-4033441	ADCY9	31.2847	22.3466	32.9786	38.6882	0.420129	0.609347	hsa_circ_0007586	http://www.circbase.org/cgi-bin/singlerecord.cgi?id=hsa_circ_0007586
hsa_circ:chr16:425133-426812	TMEM8A	0	6.38475	3.87984	7.03422	0.763736	0.823167	hsa_circ_0037173	http://www.circbase.org/cgi-bin/singlerecord.cgi?id=hsa_circ_0037173
hsa_circ:chr16:4311780-4312702	TFAP4	37.3398	56.6647	41.7082	72.687	0.276244	0.664099	hsa_circ_0002439	http://www.circbase.org/cgi-bin/singlerecord.cgi?id=hsa_circ_0002439
hsa_circ:chr16:4382216-4383520	GLIS2	47.4317	54.2704	15.5193	31.654	-1.1162	0.146791	hsa_circ_0005692	http://www.circbase.org/cgi-bin/singlerecord.cgi?id=hsa_circ_0005692
hsa_circ:chr16:4455492-4463405	CORO7,CORO7-PAM16	4.03674	0	0	0	-3.35581	0.487497	hsa_circ_0002066	http://www.circbase.org/cgi-bin/singlerecord.cgi?id=hsa_circ_0002066
hsa_circ:chr16:4457502-4458252	CORO7,CORO7-PAM16	10.0918	0	0	0	-4.682	0.329779	hsa_circ_0037708	http://www.circbase.org/cgi-bin/singlerecord.cgi?id=hsa_circ_0037708
hsa_circ:chr16:4491376-4493165	DNAJA3	0	0	4.84979	0	3.88232	0.42174	hsa_circ_0037713	http://www.circbase.org/cgi-bin/singlerecord.cgi?id=hsa_circ_0037713
hsa_circ:chr16:4516154-4519466	NMRAL1	98.9001	109.339	116.395	77.3765	-0.101494	0.818502	hsa_circ_0007788	http://www.circbase.org/cgi-bin/singlerecord.cgi?id=hsa_circ_0007788
hsa_circ:chr16:4519228-4519466	NMRAL1	0	0	9.69959	0	4.8795	0.310232	NA	NA
hsa_circ:chr16:4555485-4557013	HMOX2	5.04592	0	8.72963	0	0.801546	0.850934	NA	NA
hsa_circ:chr16:47001425-47002076	DNAJA2	0	0	8.72963	0	4.72782	0.325779	hsa_circ_0000696	http://www.circbase.org/cgi-bin/singlerecord.cgi?id=hsa_circ_0000696
hsa_circ:chr16:4700366-4702825	MGRN1	0	0	0	18.7579	5.82651	0.224528	NA	NA
hsa_circ:chr16:4700366-4707364	MGRN1	4.03674	33.5199	47.528	8.20659	0.567386	0.722823	hsa_circ_0007032	http://www.circbase.org/cgi-bin/singlerecord.cgi?id=hsa_circ_0007032
hsa_circ:chr16:4701964-4702825	MGRN1	0	0	10.6695	0	5.01674	0.296603	hsa_circ_0037736	http://www.circbase.org/cgi-bin/singlerecord.cgi?id=hsa_circ_0037736
hsa_circ:chr16:4721392-4723658	MGRN1	11.101	0	0	0	-4.81976	0.315569	hsa_circ_0037743	http://www.circbase.org/cgi-bin/singlerecord.cgi?id=hsa_circ_0037743
hsa_circ:chr16:47252779-47294606	ITFG1	0	7.18284	0	0	-4.19854	0.382922	NA	NA
hsa_circ:chr16:4731551-4733933	MGRN1	15.1378	0	0	0	-5.26792	0.272203	hsa_circ_0002119	http://www.circbase.org/cgi-bin/singlerecord.cgi?id=hsa_circ_0002119
hsa_circ:chr16:4750971-4774832	ANKS3	11.101	0	0	4.68948	-1.24656	0.783653	NA	NA
hsa_circ:chr16:47531310-47537001	PHKB	0	3.19238	0	0	-3.03348	0.531288	hsa_circ_0039261	http://www.circbase.org/cgi-bin/singlerecord.cgi?id=hsa_circ_0039261
hsa_circ:chr16:47531310-47549512	PHKB	34.3123	0	38.7984	14.0684	0.626797	0.819901	hsa_circ_0000698	http://www.circbase.org/cgi-bin/singlerecord.cgi?id=hsa_circ_0000698
hsa_circ:chr16:47531310-47581459	PHKB	0	8.77903	17.4593	14.0684	1.83021	0.397851	hsa_circ_0004791	http://www.circbase.org/cgi-bin/singlerecord.cgi?id=hsa_circ_0004791
hsa_circ:chr16:48290521-48311390	LONP2	0	4.78856	0	0	-3.61557	0.453691	NA	NA
hsa_circ:chr16:48311249-48337216	LONP2	3.02755	10.3752	0	0	-5.09591	0.23313	hsa_circ_0008558	http://www.circbase.org/cgi-bin/singlerecord.cgi?id=hsa_circ_0008558
hsa_circ:chr16:48381418-48382201	LONP2	6.05511	37.5104	0	0	-6.79757	0.00629647	hsa_circ_0005813	http://www.circbase.org/cgi-bin/singlerecord.cgi?id=hsa_circ_0005813
hsa_circ:chr16:4861171-4862249	GLYR1	14.1286	12.7695	18.4292	0	-0.539076	0.813868	hsa_circ_0037753	http://www.circbase.org/cgi-bin/singlerecord.cgi?id=hsa_circ_0037753
hsa_circ:chr16:4864538-4882913	GLYR1	0	10.3752	0	0	-4.72779	0.325009	NA	NA
hsa_circ:chr16:4867599-4882913	GLYR1	0	9.57713	0	0	-4.61256	0.337098	hsa_circ_0002241	http://www.circbase.org/cgi-bin/singlerecord.cgi?id=hsa_circ_0002241
hsa_circ:chr16:4881980-4882913	GLYR1	0	5.58666	0	3.51711	-0.681397	0.880934	hsa_circ_0037764	http://www.circbase.org/cgi-bin/singlerecord.cgi?id=hsa_circ_0037764
hsa_circ:chr16:4950831-4951090	PPL	6.05511	26.3371	13.5794	0	-1.24879	0.602434	NA	NA
hsa_circ:chr16:4952407-4954041	PPL	10.0918	2.39428	0	11.7237	-0.0932394	0.974711	NA	NA
hsa_circ:chr16:4952407-4960950	PPL	6.05511	9.57713	2.90988	0	-2.40844	0.4638	NA	NA
hsa_circ:chr16:4953887-4960950	PPL	6.05511	0	11.6395	0	0.950328	0.835175	NA	NA
hsa_circ:chr16:50321823-50322261	ADCY7	14.1286	0	40.7383	70.3422	2.98262	0.20555	hsa_circ_0000699	http://www.circbase.org/cgi-bin/singlerecord.cgi?id=hsa_circ_0000699
hsa_circ:chr16:5077136-5078186	NAGPA	21.1929	7.98094	0	17.5856	-0.734327	0.764753	hsa_circ_0007146	http://www.circbase.org/cgi-bin/singlerecord.cgi?id=hsa_circ_0007146
hsa_circ:chr16:511404-539000	RAB11FIP3	13.1194	0	0	0	-5.06117	0.291667	NA	NA
hsa_circ:chr16:521295-539000	RAB11FIP3	13.1194	0	0	0	-5.06117	0.291667	NA	NA
hsa_circ:chr16:532525-546859	RAB11FIP3	0	7.98094	0	0	-4.35014	0.36571	hsa_circ_0002774	http://www.circbase.org/cgi-bin/singlerecord.cgi?id=hsa_circ_0002774
hsa_circ:chr16:53907698-53913899	FTO	0	5.58666	0	0	-3.83712	0.425951	hsa_circ_0003232	http://www.circbase.org/cgi-bin/singlerecord.cgi?id=hsa_circ_0003232
hsa_circ:chr16:53907698-53922863	FTO	50.4592	55.8666	60.1375	25.7922	-0.30192	0.655798	hsa_circ_0005941	http://www.circbase.org/cgi-bin/singlerecord.cgi?id=hsa_circ_0005941
hsa_circ:chr16:53907698-53968021	FTO	4.03674	0	0	0	-3.35581	0.487497	hsa_circ_0039400	http://www.circbase.org/cgi-bin/singlerecord.cgi?id=hsa_circ_0039400
hsa_circ:chr16:53913756-53922863	FTO	0	18.3562	0	0	-5.54965	0.247158	hsa_circ_0039402	http://www.circbase.org/cgi-bin/singlerecord.cgi?id=hsa_circ_0039402
hsa_circ:chr16:56419831-56423287	AMFR	41.3766	19.1543	19.3992	16.4132	-0.751854	0.452113	hsa_circ_0000704	http://www.circbase.org/cgi-bin/singlerecord.cgi?id=hsa_circ_0000704
hsa_circ:chr16:56419831-56448256	AMFR	0	0	7.75967	0	4.55829	0.343757	hsa_circ_0004120	http://www.circbase.org/cgi-bin/singlerecord.cgi?id=hsa_circ_0004120
hsa_circ:chr16:57197913-57207781	FAM192A	16.147	24.7409	47.528	23.4474	0.795356	0.384457	hsa_circ_0006886	http://www.circbase.org/cgi-bin/singlerecord.cgi?id=hsa_circ_0006886
hsa_circ:chr16:57484952-57490558	COQ9	5.04592	0	0	0	-3.67914	0.445627	NA	NA
hsa_circ:chr16:583946-586142	CAPN15	0	19.1543	0	0	-5.61098	0.241929	hsa_circ_0008883	http://www.circbase.org/cgi-bin/singlerecord.cgi?id=hsa_circ_0008883
hsa_circ:chr16:58608513-58633415	CNOT1	0	0	7.75967	0	4.55829	0.343757	hsa_circ_0039692	http://www.circbase.org/cgi-bin/singlerecord.cgi?id=hsa_circ_0039692
hsa_circ:chr16:58616697-58617086	CNOT1	11.101	15.9619	7.75967	0	-1.78963	0.447566	hsa_circ_0039697	http://www.circbase.org/cgi-bin/singlerecord.cgi?id=hsa_circ_0039697
hsa_circ:chr16:58704017-58706147	SLC38A7	0	9.57713	4.84979	0	-0.978458	0.815246	hsa_circ_0007436	http://www.circbase.org/cgi-bin/singlerecord.cgi?id=hsa_circ_0007436
hsa_circ:chr16:58709844-58710250	SLC38A7	0	7.18284	2.90988	0	-1.29807	0.773602	hsa_circ_0004541	http://www.circbase.org/cgi-bin/singlerecord.cgi?id=hsa_circ_0004541
hsa_circ:chr16:58749918-58750717	GOT2	6.05511	0	0	0	-3.94312	0.413042	hsa_circ_0008890	http://www.circbase.org/cgi-bin/singlerecord.cgi?id=hsa_circ_0008890
hsa_circ:chr16:58749918-58753159	GOT2	0	0	17.4593	0	5.72619	0.232696	hsa_circ_0005943	http://www.circbase.org/cgi-bin/singlerecord.cgi?id=hsa_circ_0005943
hsa_circ:chr16:58752100-58753159	GOT2	10.0918	0	0	0	-4.682	0.329779	hsa_circ_0039714	http://www.circbase.org/cgi-bin/singlerecord.cgi?id=hsa_circ_0039714
hsa_circ:chr16:58756054-58757806	GOT2	0	10.3752	0	0	-4.72779	0.325009	NA	NA
hsa_circ:chr16:66759731-66763002	DYNC1LI2	31.2847	22.3466	10.6695	22.275	-0.706826	0.507763	hsa_circ_0008242	http://www.circbase.org/cgi-bin/singlerecord.cgi?id=hsa_circ_0008242
hsa_circ:chr16:66761591-66763002	DYNC1LI2	11.101	0	0	0	-4.81976	0.315569	hsa_circ_0008222	http://www.circbase.org/cgi-bin/singlerecord.cgi?id=hsa_circ_0008222
hsa_circ:chr16:66769978-66776571	DYNC1LI2	14.1286	0	0	0	-5.16819	0.275043	NA	NA
hsa_circ:chr16:66839680-66839929	NAE1	21.1929	0	6.78971	12.8961	-0.103278	0.967867	hsa_circ_0002604	http://www.circbase.org/cgi-bin/singlerecord.cgi?id=hsa_circ_0002604
hsa_circ:chr16:66971940-66973261	CES2	19.1745	6.38475	9.69959	0	-1.38484	0.559283	hsa_circ_0008716	http://www.circbase.org/cgi-bin/singlerecord.cgi?id=hsa_circ_0008716
hsa_circ:chr16:67070542-67100701	CBFB	7.06429	17.5581	13.5794	0	-0.852239	0.707617	hsa_circ_0039783	http://www.circbase.org/cgi-bin/singlerecord.cgi?id=hsa_circ_0039783
hsa_circ:chr16:67070542-67116211	CBFB	54.496	36.7123	51.4078	18.7579	-0.369369	0.630203	hsa_circ_0006482	http://www.circbase.org/cgi-bin/singlerecord.cgi?id=hsa_circ_0006482
hsa_circ:chr16:67070542-67116242	CBFB	37.3398	19.9523	42.6782	35.1711	0.448726	0.576142	hsa_circ_0000707	http://www.circbase.org/cgi-bin/singlerecord.cgi?id=hsa_circ_0000707
hsa_circ:chr16:67320903-67321917	PLEKHG4	0	7.18284	0	0	-4.19854	0.382922	NA	NA
hsa_circ:chr16:67578202-67578733	FAM65A	7.06429	3.99047	0	0	-4.81556	0.276992	NA	NA
hsa_circ:chr16:67644727-67646024	CTCF	0	11.9714	6.78971	22.275	1.26656	0.562816	hsa_circ_0002122	http://www.circbase.org/cgi-bin/singlerecord.cgi?id=hsa_circ_0002122
hsa_circ:chr16:67660458-67663436	CTCF	0	3.19238	7.75967	0	1.27561	0.775158	hsa_circ_0000709	http://www.circbase.org/cgi-bin/singlerecord.cgi?id=hsa_circ_0000709
hsa_circ:chr16:67662273-67663436	CTCF	40.3674	23.9428	47.528	26.9645	0.219504	0.783806	hsa_circ_0008272	http://www.circbase.org/cgi-bin/singlerecord.cgi?id=hsa_circ_0008272
hsa_circ:chr16:67719360-67719705	GFOD2	15.1378	19.9523	28.1288	18.7579	0.418234	0.699654	NA	NA
hsa_circ:chr16:68071909-68088520	DUS2	0	3.19238	0	0	-3.03348	0.531288	hsa_circ_0039912	http://www.circbase.org/cgi-bin/singlerecord.cgi?id=hsa_circ_0039912
hsa_circ:chr16:68155890-68157024	ENSG00000261864.1,NFATC3	37.3398	81.4056	98.9358	64.4804	0.457107	0.424025	hsa_circ_0005615	http://www.circbase.org/cgi-bin/singlerecord.cgi?id=hsa_circ_0005615
hsa_circ:chr16:68155890-68160513	ENSG00000261864.1,NFATC3	50.4592	189.148	81.4765	140.684	-0.111621	0.905494	hsa_circ_0000711	http://www.circbase.org/cgi-bin/singlerecord.cgi?id=hsa_circ_0000711
hsa_circ:chr16:68191772-68200918	NFATC3	0	5.58666	0	0	-3.83712	0.425951	NA	NA
hsa_circ:chr16:68200746-68217269	NFATC3	5.04592	0	0	0	-3.67914	0.445627	NA	NA
hsa_circ:chr16:68208277-68217269	NFATC3	10.0918	0	0	4.68948	-1.10935	0.790338	hsa_circ_0039933	http://www.circbase.org/cgi-bin/singlerecord.cgi?id=hsa_circ_0039933
hsa_circ:chr16:68224671-68225678	NFATC3	0	0	0	10.5513	4.99527	0.298708	hsa_circ_0000713	http://www.circbase.org/cgi-bin/singlerecord.cgi?id=hsa_circ_0000713
hsa_circ:chr16:68300496-68309152	SLC7A6	12.1102	21.5485	12.6095	12.8961	-0.403074	0.771797	hsa_circ_0005623	http://www.circbase.org/cgi-bin/singlerecord.cgi?id=hsa_circ_0005623
hsa_circ:chr16:68308594-68309152	SLC7A6	14.1286	0	16.4893	7.03422	0.74574	0.748312	hsa_circ_0007669	http://www.circbase.org/cgi-bin/singlerecord.cgi?id=hsa_circ_0007669
hsa_circ:chr16:68845587-68849662	CDH1	0	0	7.75967	0	4.55829	0.343757	hsa_circ_0039992	http://www.circbase.org/cgi-bin/singlerecord.cgi?id=hsa_circ_0039992
hsa_circ:chr16:68847216-68849662	CDH1	0	0	12.6095	0	5.25734	0.273709	hsa_circ_0039994	http://www.circbase.org/cgi-bin/singlerecord.cgi?id=hsa_circ_0039994
hsa_circ:chr16:68893787-68896964	TANGO6	10.0918	0	0	0	-4.682	0.329779	hsa_circ_0003220	http://www.circbase.org/cgi-bin/singlerecord.cgi?id=hsa_circ_0003220
hsa_circ:chr16:68912021-68914533	TANGO6	0	0	3.87984	0	3.56175	0.462171	hsa_circ_0040002	http://www.circbase.org/cgi-bin/singlerecord.cgi?id=hsa_circ_0040002
hsa_circ:chr16:69170599-69177292	UTP4	0	11.9714	6.78971	0	-0.816418	0.857075	hsa_circ_0008700	http://www.circbase.org/cgi-bin/singlerecord.cgi?id=hsa_circ_0008700
hsa_circ:chr16:69173728-69177292	UTP4	0	10.3752	0	0	-4.72779	0.325009	hsa_circ_0040016	http://www.circbase.org/cgi-bin/singlerecord.cgi?id=hsa_circ_0040016
hsa_circ:chr16:69184440-69184807	UTP4	0	0	11.6395	0	5.14205	0.284521	hsa_circ_0040021	http://www.circbase.org/cgi-bin/singlerecord.cgi?id=hsa_circ_0040021
hsa_circ:chr16:69189774-69201088	UTP4	0	5.58666	0	0	-3.83712	0.425951	hsa_circ_0007018	http://www.circbase.org/cgi-bin/singlerecord.cgi?id=hsa_circ_0007018
hsa_circ:chr16:69279505-69294163	SNTB2	4.03674	5.58666	0	0	-4.61699	0.303974	NA	NA
hsa_circ:chr16:69293953-69304188	SNTB2	0	0	0	3.51711	3.40518	0.482694	NA	NA
hsa_circ:chr16:69317951-69318147	SNTB2	14.1286	16.76	0	0	-6.2992	0.0283409	hsa_circ_0004354	http://www.circbase.org/cgi-bin/singlerecord.cgi?id=hsa_circ_0004354
hsa_circ:chr16:69404386-69406258	TERF2	87.7991	55.0685	88.2663	107.858	0.460055	0.34407	NA	NA
hsa_circ:chr16:69729039-69729282	NFAT5	19.1745	26.3371	22.3091	28.1369	0.144723	0.881778	hsa_circ_0006845	http://www.circbase.org/cgi-bin/singlerecord.cgi?id=hsa_circ_0006845
hsa_circ:chr16:69748867-69752437	NQO1	4.03674	0	0	0	-3.35581	0.487497	hsa_circ_0040084	http://www.circbase.org/cgi-bin/singlerecord.cgi?id=hsa_circ_0040084
hsa_circ:chr16:69752026-69752437	NQO1	17.1561	23.1447	42.6782	43.3777	1.09101	0.183163	hsa_circ_0004983	http://www.circbase.org/cgi-bin/singlerecord.cgi?id=hsa_circ_0004983
hsa_circ:chr16:69810092-69833198	WWP2	7.06429	0	0	0	-4.16619	0.386659	NA	NA
hsa_circ:chr16:69874029-69876023	WWP2	0	0	8.72963	0	4.72782	0.325779	hsa_circ_0040097	http://www.circbase.org/cgi-bin/singlerecord.cgi?id=hsa_circ_0040097
[truncated: 5,589 more rows]
